# Supplementary material
Source: publisher figshare collection journal article supplement (https://karger.figshare.com/ndownloader/files/17922929)
Supplement: Supplementary file 1 [file 17922929]

**Supplementary Files**

**Supplementary Methods 1.** Search strategies

**Supplementary Methods 2.** QUADAS-2 Coding manual for primary studies included in the present study

**Supplementary Figure 1.** Flow diagram of study selection process

**Supplementary Figure 2a-2af.** Forest plots of sensitivity and specificity estimates for the original PHQ-9 diagnostic algorithm for each reference standard category, including participant subgroups based on age, sex, human development index and care setting (Note that some confidence intervals are very wide due to small numbers of cases/non-cases in certain subgroups)

**Supplementary Figure 3a-3af.** Forest plots of sensitivity and specificity estimates for the modified PHQ-9 diagnostic algorithm for each reference standard category, including participant subgroups based on age, sex, human development index and care setting (Note that some confidence intervals are very wide due to small numbers of cases/non-cases in certain subgroups)

**Supplementary Figure 4a-b.** Nomograms of a) positive predictive value and b) negative predictive value for the original PHQ-9 diagnostic algorithm for major depression prevalence values of 5 to 25% for semi-structured diagnostic interviews, fully structured diagnostic interviews, and the MINI.

**Supplementary Figure 5a-b.** Nomograms of a) positive predictive value and b) negative predictive value for the modified PHQ-9 diagnostic algorithm for major depression prevalence values of 5 to 25% for semi-structured diagnostic interviews, fully structured diagnostic interviews, and the MINI.

**Supplementary Table 1**. Reasons for exclusion for all articles excluded at full-text level

**Supplementary Table 2a.** Characteristics of included primary studies

**Supplementary Table 2b**. Characteristics of eligible primary studies that did not contribute data for the present study

**Supplementary Table 3.** Estimates of heterogeneity for the PHQ-9 diagnostic algorithm

**Supplementary Table 4a.** Comparison of sensitivity and specificity estimates for the PHQ-9 diagnostic algorithm among all participants, among participants not currently diagnosed or receiving treatment for a mental health problem, and among participant subgroups based on age, sex, human development index, and care setting

**Supplementary Table 4b.** Comparison of sensitivity and specificity estimates for the modified PHQ-9 diagnostic algorithm among all participants, among participants not currently diagnosed or receiving treatment for a mental health problem, and among participant subgroups based on age, sex, human development index, and care setting

**Supplementary Table 4c**. Differences in sensitivity and specificity estimates for the PHQ-9 diagnostic algorithm among fully structured reference standards and MINI reference standards compared to semi-structured reference standards among all participants, among participants not currently diagnosed or receiving treatment for a mental health problem, and among participant subgroups based on age, sex, human development index, and care setting

**Supplementary Table 4d**. Differences in sensitivity and specificity estimates for the modified PHQ-9 diagnostic algorithm among fully structured reference standards and MINI reference standards compared to semi-structured reference standards among all participants, among participants not currently diagnosed or receiving treatment for a mental health problem, and among participant subgroups based on age, sex, human development index, and care setting

**Supplementary Table 5.** QUADAS-2 ratings for each primary study included in the present study

**Supplementary Methods 1.** Search strategies

**MEDLINE (OvidSP)**

1. PHQ*.af.

2. patient health questionnaire*.af.

3. 1 or 2

4. Mass Screening/

5. Psychiatric Status Rating Scales/

6. "Predictive Value of Tests"/

7. "Reproducibility of Results"/

8. exp "Sensitivity and Specificity"/

9. Psychometrics/

10. Prevalence/

11. Reference Values/

12.. Reference Standards/

13. exp Diagnostic Errors/

14. Mental Disorders/di, pc [Diagnosis, Prevention & Control]

15. Mood Disorders/di, pc [Diagnosis, Prevention & Control]

16. Depressive Disorder/di, pc [Diagnosis, Prevention & Control]

17. Depressive Disorder, Major/di, pc [Diagnosis, Prevention & Control]

18. Depression, Postpartum/di, pc [Diagnosis, Prevention & Control]

19. Depression/di, pc [Diagnosis, Prevention & Control]

20. validation studies.pt.

21. comparative study.pt.

22. screen*.af.

23. prevalence.af.

24. predictive value*.af.

25. detect*.ti.

26. sensitiv*.ti.

27. valid*.ti.

28. revalid*.ti.

29. predict*.ti.

30. accura*.ti.

31. psychometric*.ti.

32. identif*.ti.

33. specificit*.ab.

34. cut?off*.ab.

35. cut* score*.ab.

36. cut?point*.ab.

37. threshold score*.ab.

38. reference standard*.ab.

39. reference test*.ab.

40. index test*.ab.

41. gold standard.ab.

42. or/4-41

43. 3 and 42

44. limit 43 to yr=”2000-Current”

**PsycINFO (OvidSP)**

1. PHQ*.af.

2. patient health questionnaire*.af.

3. 1 or 2

4. Diagnosis/

5. Medical Diagnosis/

6. Psychodiagnosis/

7. Misdiagnosis/

8. Screening/

9. Health Screening/

10. Screening Tests/

11. Prediction/

12. Cutting Scores/

13. Psychometrics/

14. Test Validity/

15. screen*.af.

16. predictive value*.af.

17. detect*.ti.

18. sensitiv*.ti.

19. valid*.ti.

20. revalid*.ti.

21. accura*.ti.

22. psychometric*.ti.

23. specificit*.ab.

24. cut?off*.ab.

25. cut* score*.ab.

26. cut?point*.ab.

27. threshold score*.ab.

28. reference standard*.ab.

29. reference test*.ab.

30. index test*.ab.

31. gold standard.ab.

32. or/4-31

33. 3 and 32

38. Limit 33 to “2000 to current”

**Web of Science (Web of Knowledge)**

**#1:** TS=(PHQ* OR “Patient Health Questionnaire*”)

#2: TS= (screen* OR prevalence OR “predictive value*” OR detect* OR sensitiv* OR valid* OR revalid* OR predict* OR accura* OR psychometric* OR identif* OR specificit* OR cutoff* OR “cut off*” OR “cut* score*” OR cutpoint* OR “cut point*” OR “threshold score*” OR “reference standard*” OR “reference test*” OR “index test*” OR “gold standard”)

#1 AND #2

Indexes=SCI-EXPANDED, SSCI, A&HCI, CPCI-S, CPCI-SSH Timespan=2000-2014

**Supplementary Methods 2.** QUADAS-2 Coding manual for primary studies included in the present study

**Domain 1: Participant Selection**

1. **Signalling question 1 – Was a consecutive or random sample of patients enrolled?:** Code as “yes” if a consecutive or random sample of participants were recruited for the study and the percentage of eligible participants who participate is ≥75%. If the study indicates that consecutive or random participants were recruited, but does not give an indication of the total number of eligible participants and how many agreed to participate in the study, this should be rated “unclear”. If the percentage of eligible participants included in the study was between ≥50% and <75%, then this should also be marked as “unclear”. If a very low rate of eligible participants (<50%) were included in the study, this should be coded “no.” In “Notes”, please provide the relevant numbers and percentages used to make a determination. If a convenience sample of participants was recruited for the study or if the study was a case-control design, code as “no”.
2. **Signalling question 2 – Was a case-control design avoided?:** Code as “yes” if the study did not employ a case-control design. Code as “no” if the study used a case-control design.
3. **Signalling question 3 – Did the study avoid inappropriate exclusions?:** Inappropriate exclusions refer to situations where an important part of the screening population was excluded from the study based on characteristics that could be related to screening results. Code as “yes” if the study does not inappropriately exclude participants. Code as “no” if the study inappropriately excludes participants.
4. **Overall risk of bias**: Rate as “low”, “high”, or “unclear” as described in QUADAS-2. Please indicate factors in decision in “Notes”. NOTE: if signalling question 1 was coded “Unclear” the overall risk of bias is either a) Unclear, in cases where the denominator is not specified, or the percentage cannot be calculated, or method of participant selection is unclear OR b) Low, in cases where the percentage can be calculated, and is between 50-75%. If signalling question 1 is a “no” and signalling questions 2 and 3 are both “yes” then the risk of bias is coded “Unclear”.
5. **Applicability concerns:** Code as “low” if study excluded participants who were already diagnosed or treated for depression or if the study included these patients, but they can be excluded using the individual patient data. Also code as “low” if the study did not exclude participants already diagnosed with depression and the overall percentage of these participants is low (e.g., ≤ 2.0% of total participants), even if there is not a variable to exclude them. Code “unclear” if the study did not exclude participants already diagnosed or treated for depression and it is not known how many diagnosed and treated patients were included or if the percentage is moderate (e.g., >2.0% but ≤ 5.0%). Code “high” if already diagnosed and treated patients are included and make up > 5.0% of the total sample and there is not a variable to exclude them. Please see aggregated study information sheet to code this.

**Domain 2: Index Test**

1. **Signalling question 1 - Were the index test results interpreted without the knowledge of the results of the reference standard?:** Code this item as “N/A” for all studies, as the index test is scored and does not require interpretation.
2. **Signalling question 2 - If a threshold was used, was it pre-specified?:** Code this item as “N/A” for all studies, as individual participant data allows for testing at all thresholds/cut-offs.
3. **Overall risk of bias:** Rate this item as “low” for all studies since the interpretation of the index test is fully automated in scoring self-report depressive symptom questionnaires and the individual participant data allows for testing at all thresholds/cut-offs.
4. **Applicability concerns:** Code “low” if the standard language version of the index test was used or if a translated version was used with an appropriate translation and back-translation process, or a translated version is located online. Code “unclear” if a translated version was used and it is not clear what steps were taken to ensure the quality of the translation or if only forward translation was used.

**Domain 3: Reference Standard**

1. **Signalling question 1 – Is the reference standard likely to correctly classify the condition?:** This question will be coded as “yes” for all studies because the use of a validated semi- or fully-structured psychiatric interview to assess participants for a DSM or ICD diagnosis of MDD/MDE is an eligibility requirement.
2. **Signalling question 2 – Were the reference standard results interpreted without knowledge of the results of the index test?:** Code as “yes” if the person administering the diagnostic interview was blinded to the participant’s score on the index test, or if the diagnostic interview was administered before the index test. Code as “no” if the person administering the diagnostic interview was not blinded or was aware of the participant’s score on the index test. Code as “unclear” if the study does not indicate whether blinding occurred and we cannot ascertain whether blinding occurred.
3. **Study-specific Signalling question 3 – Did a qualified person administer the reference standard?:** For structured clinical interviews, this will typically be coded “yes” as no specific clinical training is required. For semi-structured interviews, this will be coded “yes” if a trained diagnostician administered the clinical interview (e.g., psychiatrist, psychologist, social worker). Code “no” if individuals without the required training administered the reference standard (e.g., students, research assistants). Code “unclear” if the characteristics of personnel who administered the diagnostic interview cannot be ascertained or if advanced trainees, such as doctoral students, administered the reference standard. If the name of the interviewer is provided in the article, but no credentials are listed, then code based on credentials retrieved online for the interviewer.
4. **Overall risk of bias:** The coding of this item should consider blinding of the person administering the diagnostic interview to the participant’s score on the index test and the qualifications of individuals administering the reference standard interview.
5. **Applicability concerns:** This item will be coded as “low” for most standard language studies, since the use of a validated semi- or fully-structured psychiatric interview to assess participants for a DSM or ICD diagnosis of MDD/MDE is an eligibility requirement. For translated versions of a validated reference standard, code “low” if a translated version was used with an appropriate translation and back-translation process, or a translated version is located online. Code “unclear” if a translated version was used and it is not clear what steps were taken to ensure the quality of the translation or if only forward translation was used.

**Domain 4: Flow and Timing**

1. **Signalling question 1 – Was there an appropriate interval between index test and reference standard?:** Only patient data with two weeks or less between the index text and reference standard are included. Thus, code “yes” if index test and reference standard were administered within a week of each other. Code “unclear” if the period was greater than one week (but less than two weeks) or if the timing cannot be ascertained beyond knowing that it was < 2 weeks. Note that this item may be coded differently for different patients from the same study. Please see aggregated study information sheet to code this.
2. **Signalling question 2 – Did all patients receive a reference standard?:** This will typically be coded “yes”. If a portion of positive and negative screens receive the reference standard, and the patients selected were chosen randomly, code “yes”. If non-random selection based on clinical factors or the index test determined whether or not patients received a reference standard, then code “unclear” or “no”. An example of all patients not receiving a reference standard would occur, for instance, if patients who endorsed suicidality on the index test were referred for evaluation and did not receive the reference standard interview.
3. **Signalling question 3 – Did all patients receive the same reference standard?:** This question will typically be coded as “yes” for all studies, since the reference standard is almost always consistent within each study.
4. **Signalling question 4 – Were all patients included in the analysis?:** When coding for this question, compare the number of participants who received the index test to the number of participants who received the reference standard. Code as “yes” if at least 90% of participants who received the index test also received the reference standard, or vice versa, and were included in analyses. Code as “unclear” if this difference is ≥ 80%, but < 90% or if it cannot be determined. Code as “no” if it is < 80%. If the study used randomly selected patients for either the index test or the reference standard, do not count the participants who did not receive the reference standard for that reason as missing. In “Notes”, please provide the relevant numbers and percentages used to make a determination.
5. **Overall risk of bias:** Rate as “low”, “high”, or “unclear” risk of bias. Given that questions 2 and 3 will typically be coded as "yes", use the following rules to code the overall risk of bias:

**SQ1 = UNCLEAR and SQ4 = YES:**code as UNCLEAR risk of bias **SQ1 = UNCLEAR and SQ4 = UNCLEAR:**code as UNCLEAR risk of bias **SQ1 = UNCLEAR and SQ4 = NO:**code as HIGH risk of bias if the % in SQ4 is <50% and code as UNCLEAR risk of bias if the % in SQ4 is >=50% **SQ1 = YES and SQ4 = UNCLEAR:**code as UNCLEAR risk of bias **SQ1 = YES and SQ4 = YES:** code as LOW risk of bias
**SQ1 = YES and SQ4 = NO:** code as HIGH risk of bias if the % in SQ4 is <50% and code as UNCLEAR risk of bias if the % in SQ4 is >=50%

**Note**: If “IPD” was selected for signalling question 1, and the overall risk of bias rating depends on the individual patient rating in signalling question 1, then rate as “IPD” and indicate which participants should receive which bias rating (for example, participants administered the reference standard within 1 week are rated as “low”, whereas those administered the reference standard within 1-2 weeks are rated as “unclear”).

Please indicate factors in decision in “Notes”.

**Supplementary Figure 1.** Flow diagram of study selection process

**Supplementary Figure 2a.** Forest plots of sensitivity and specificity estimates for the original diagnostic PHQ-9 algorithm, among studies that used a semi-structured diagnostic interview as the reference standard (N studies = 27; N participants = 6,331; N major depression = 787)

**
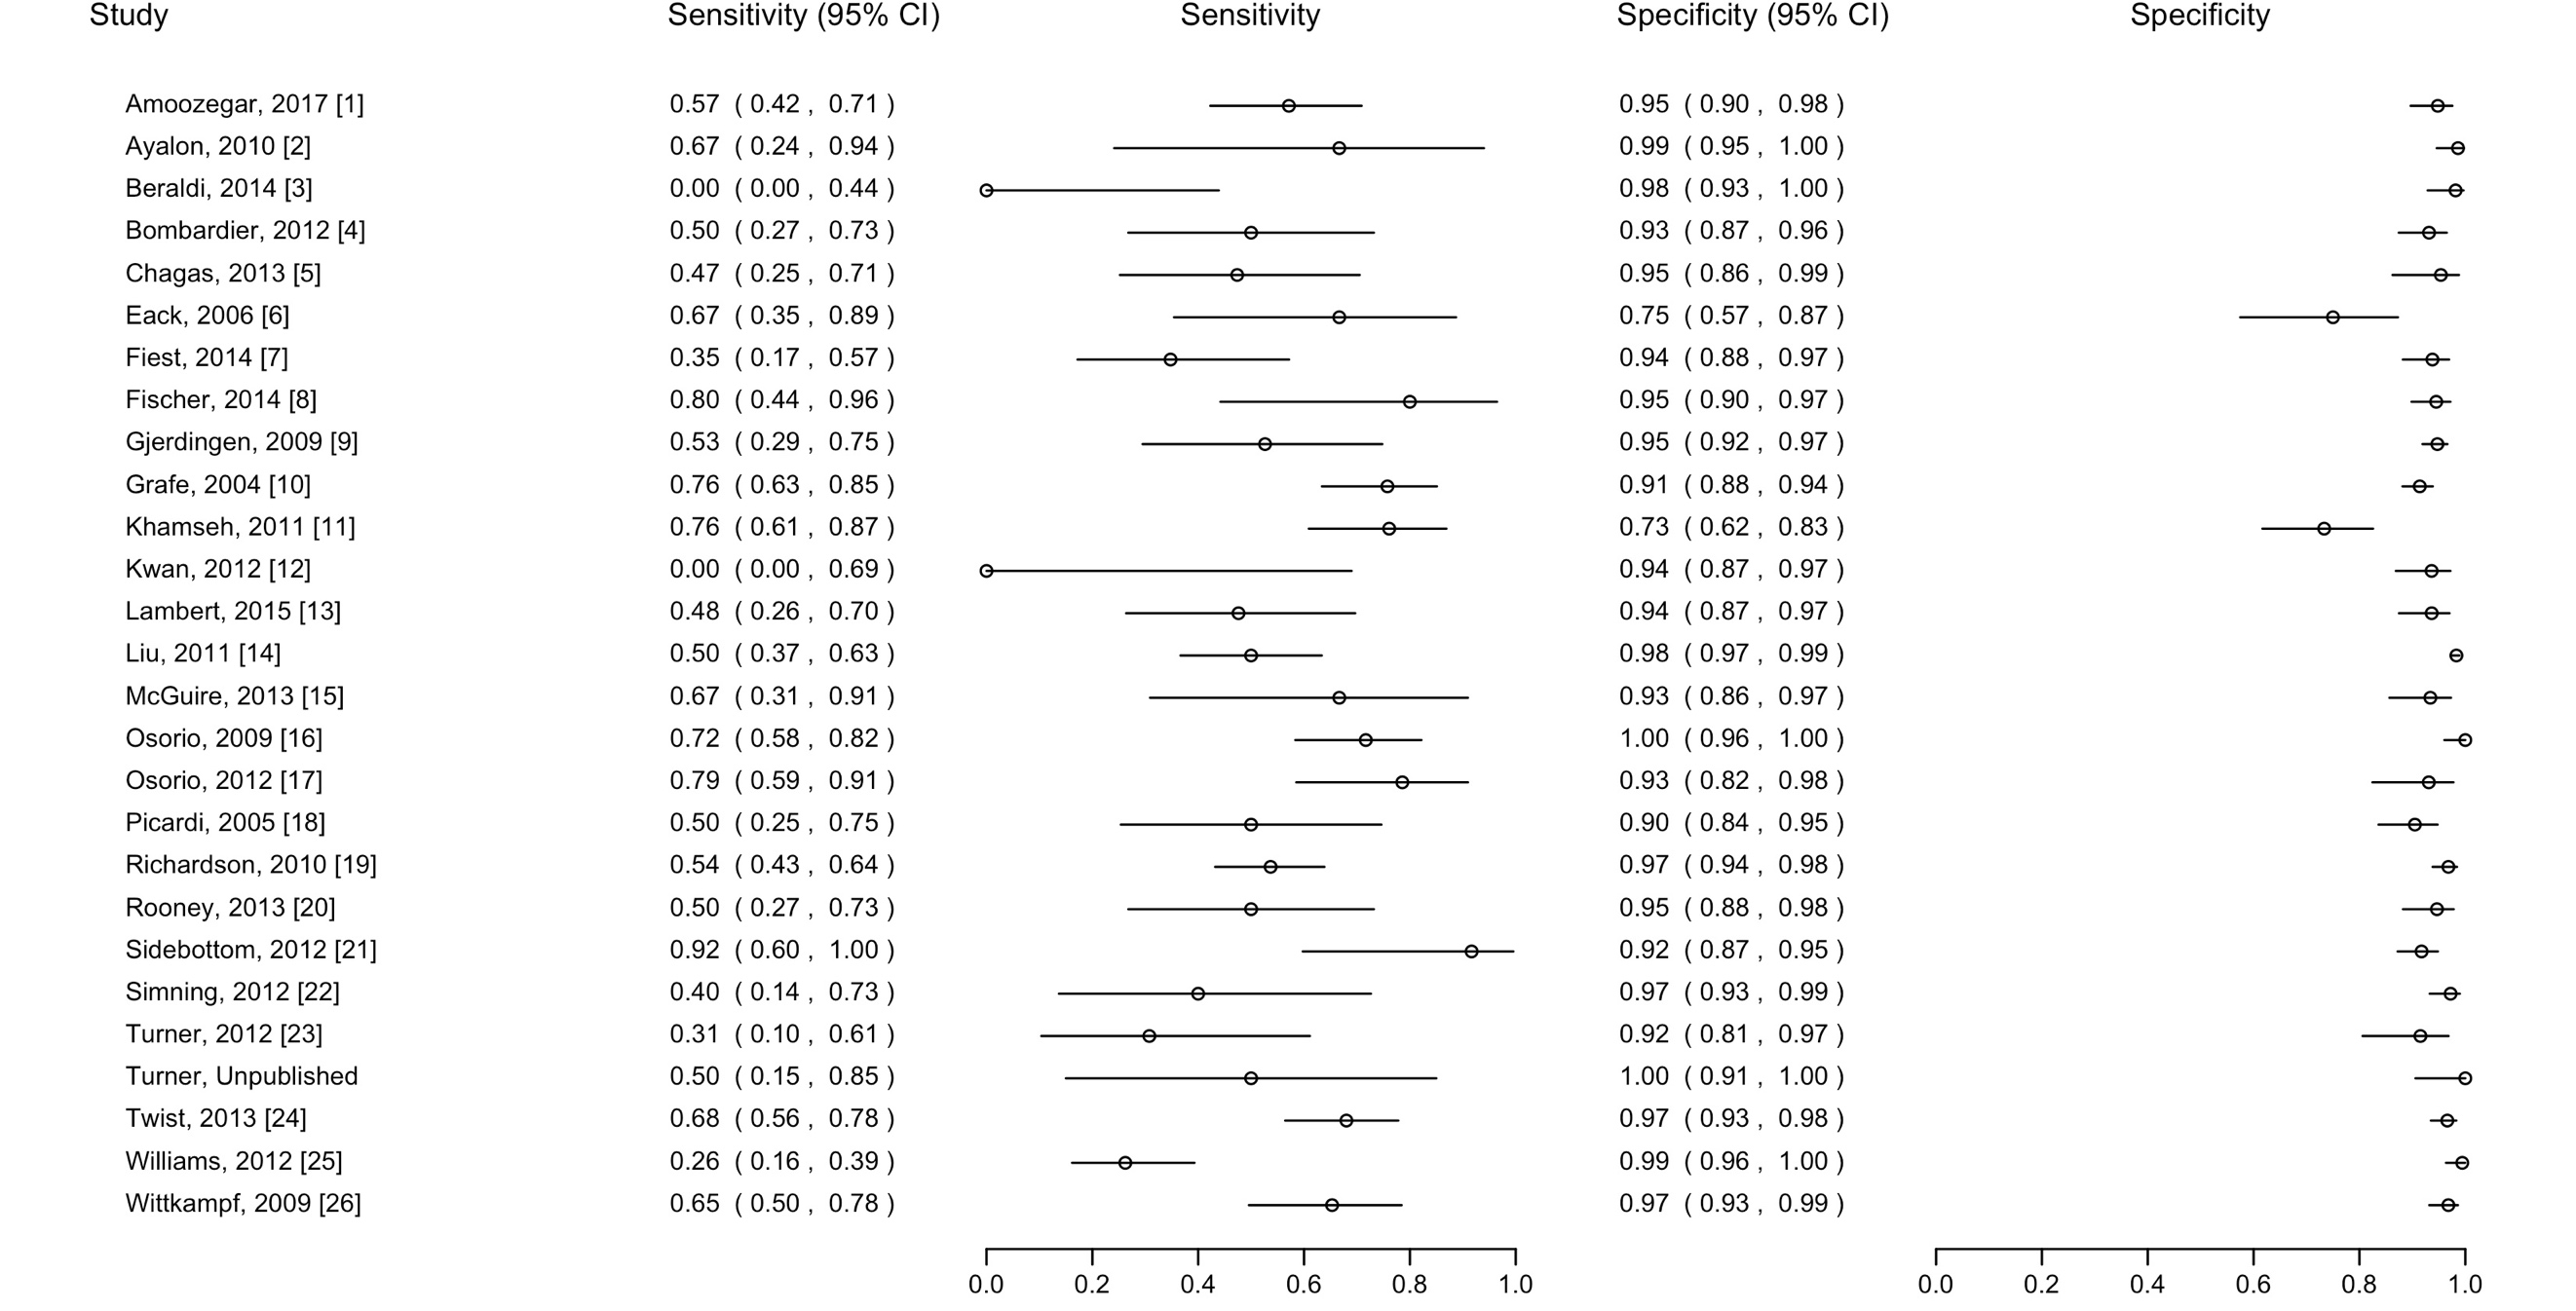
**

**Supplementary Figure 2b.** Forest plots of sensitivity and specificity estimates for the original diagnostic PHQ-9 algorithm among participants aged <60, among studies that used a semi-structured diagnostic interview as the reference standard (N studies = 24; N participants = 3,844; N major depression = 516)

**
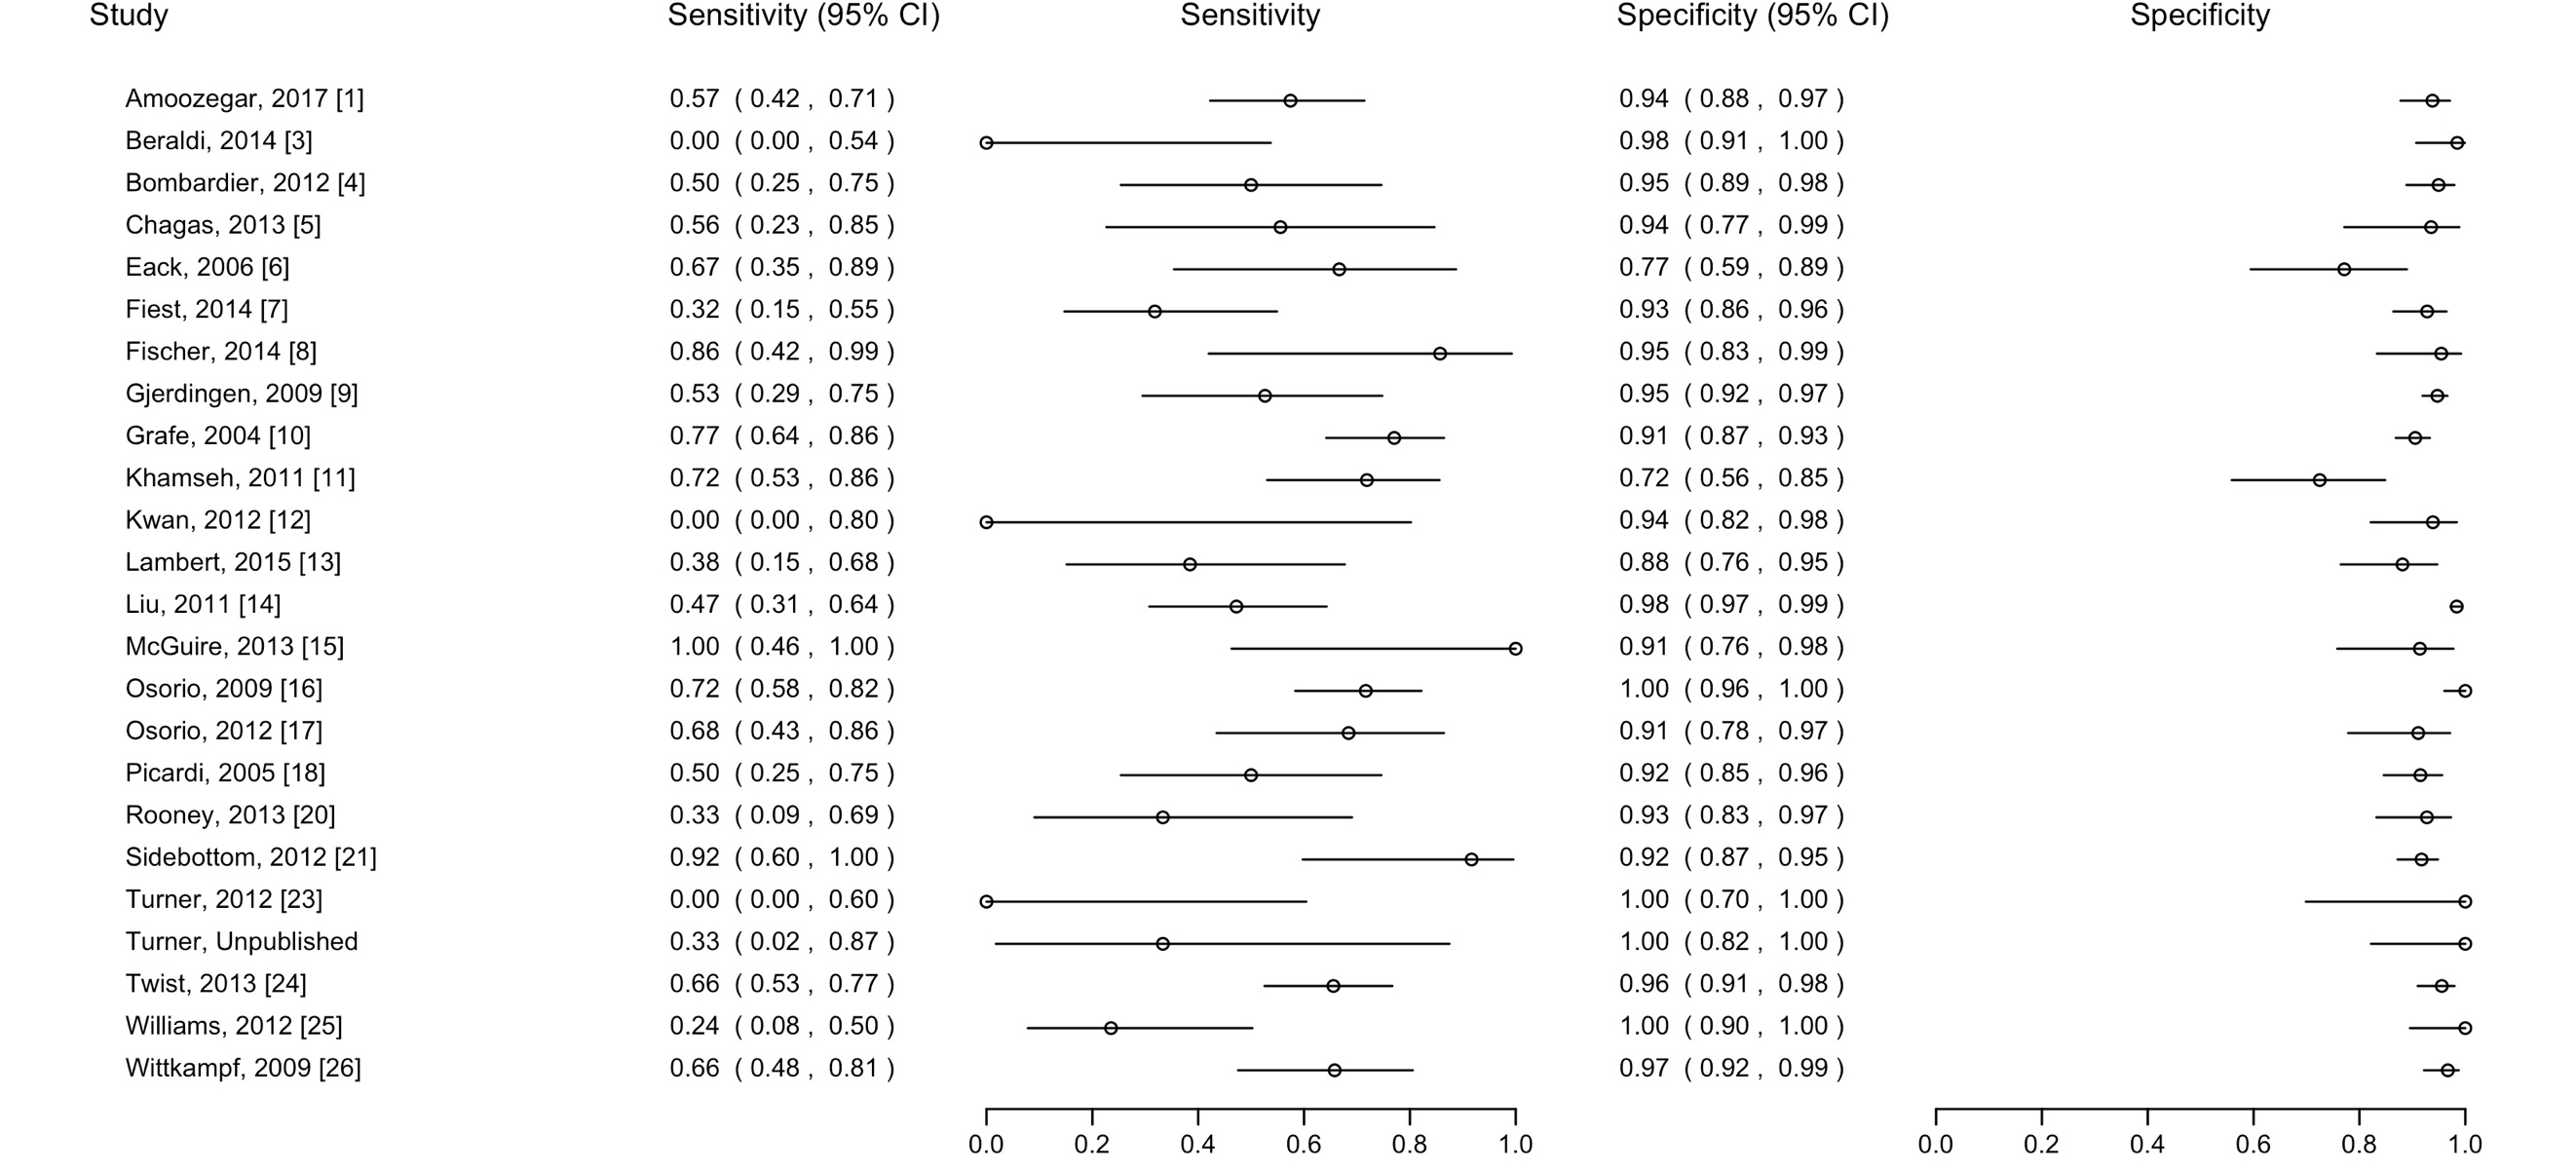
**

**Supplementary Figure 2c.** Forest plots of sensitivity and specificity estimates for the original diagnostic PHQ-9 algorithm among participants aged ≥60, among studies that used a semi-structured diagnostic interview as the reference standard (N studies = 24; N participants = 2,480; N major depression = 271)

**
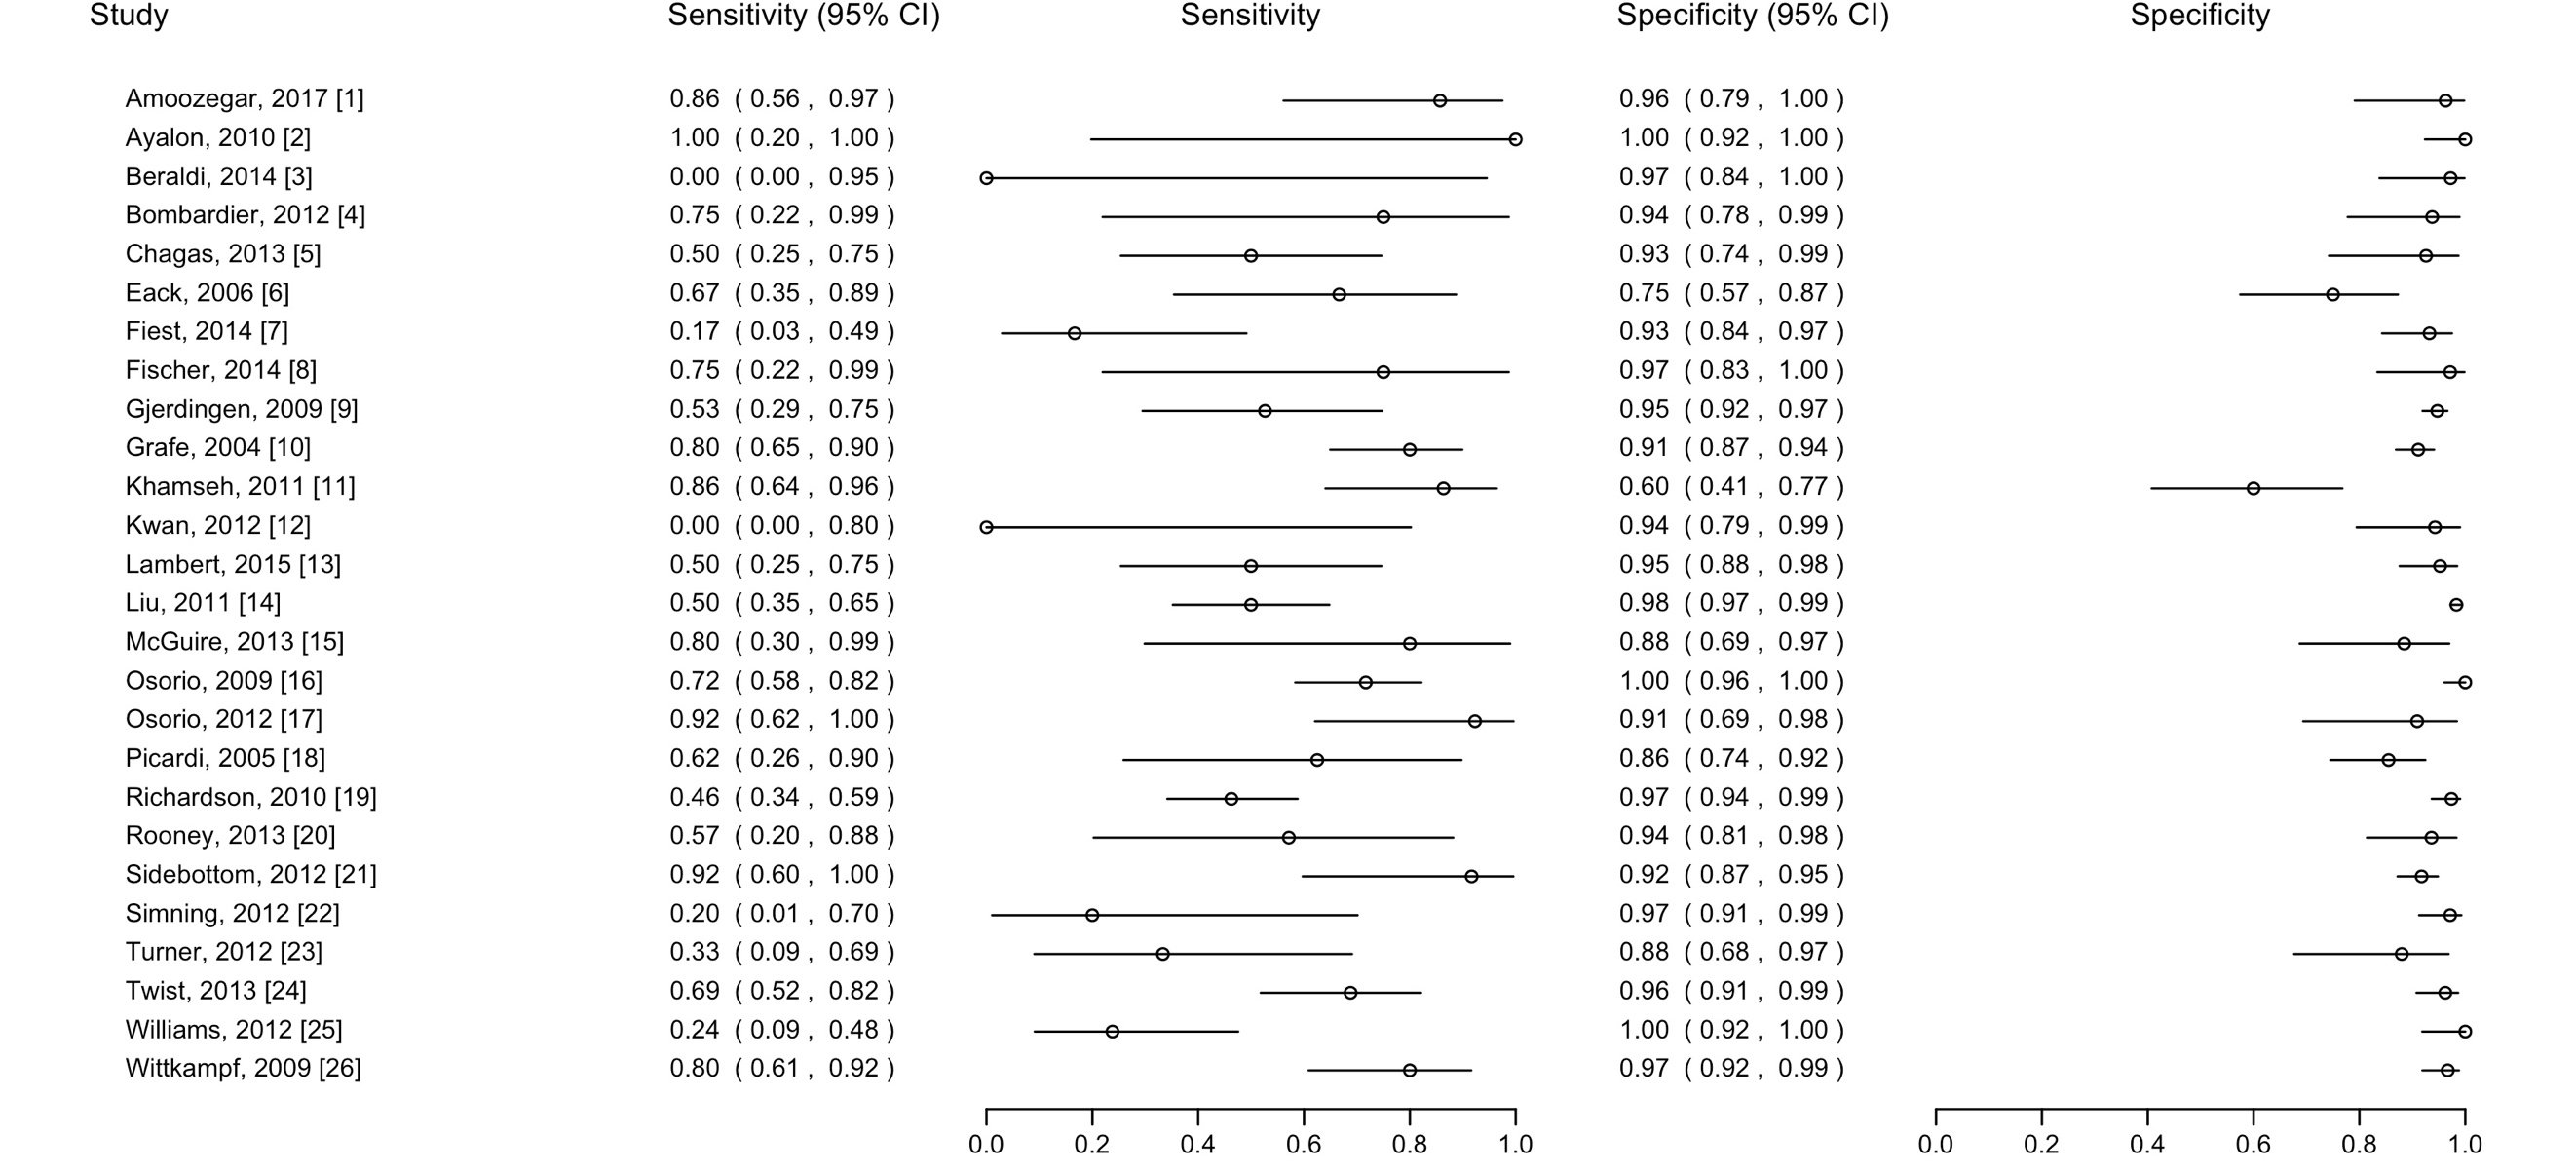
**

**Supplementary Figure 2d.** Forest plots of sensitivity and specificity estimates for the original diagnostic PHQ-9 algorithm among women, among studies that used a semi-structured diagnostic interview as the reference standard (N studies = 26; N participants = 3,671; N major depression = 477)

**
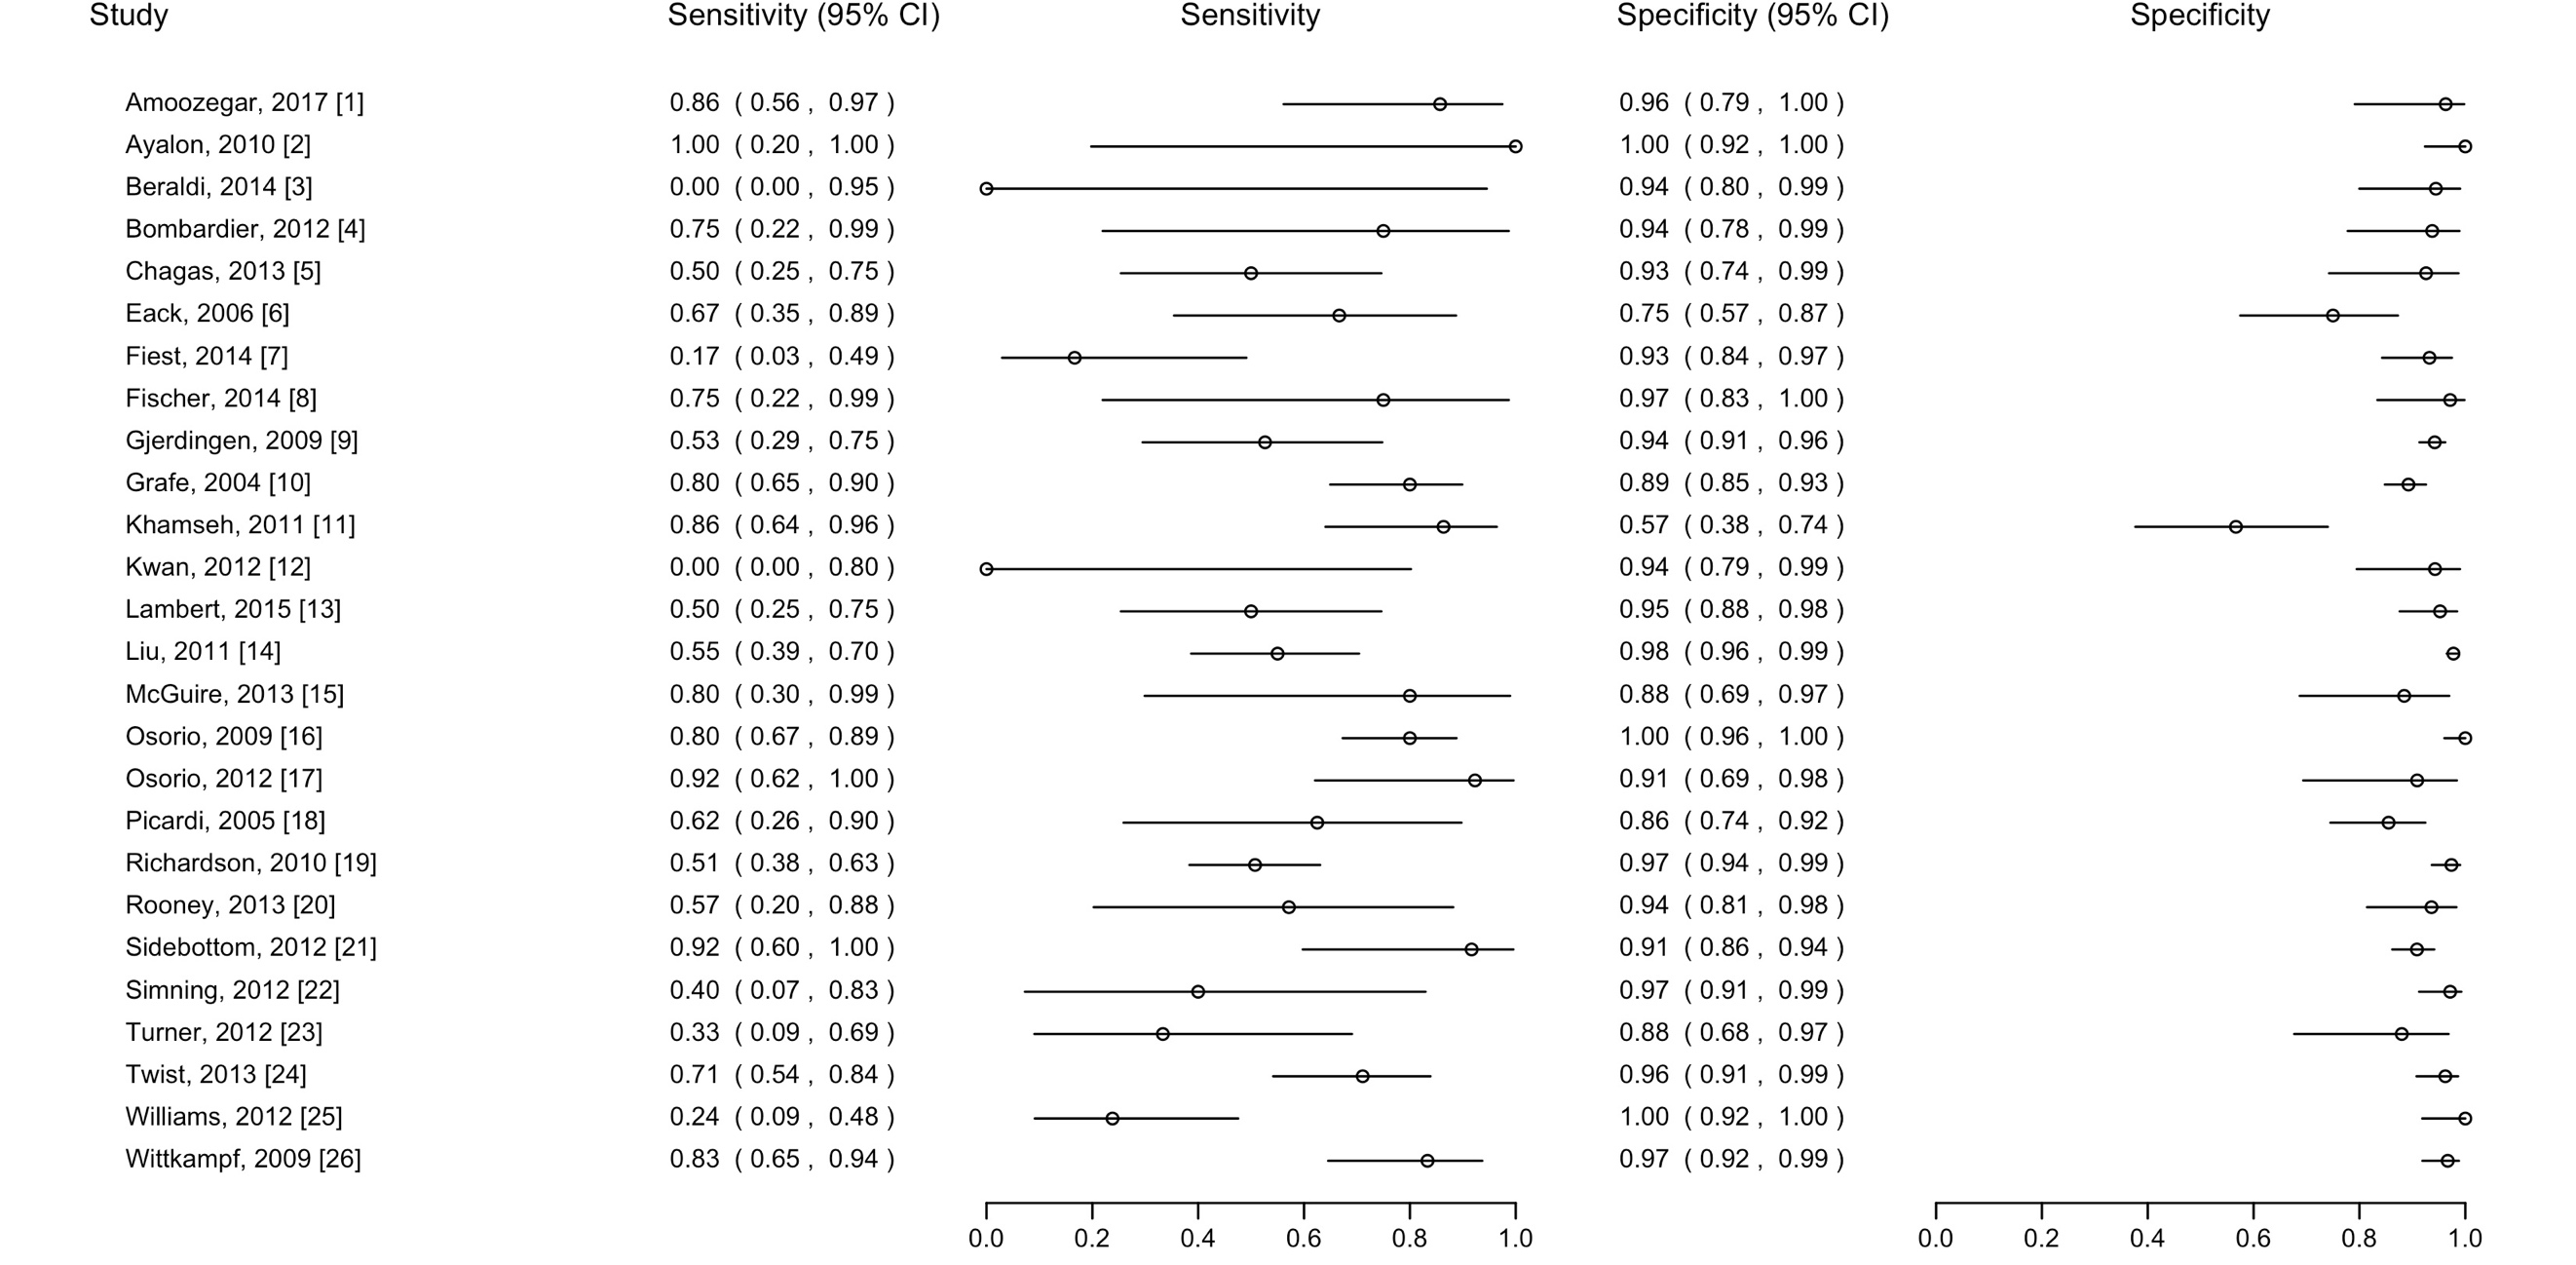
**

**Supplementary Figure 2e.** Forest plots of sensitivity and specificity estimates for the original diagnostic PHQ-9 algorithm among men, among studies that used a semi-structured diagnostic interview as the reference standard (N studies = 23; N participants = 2,653; N major depression = 310)


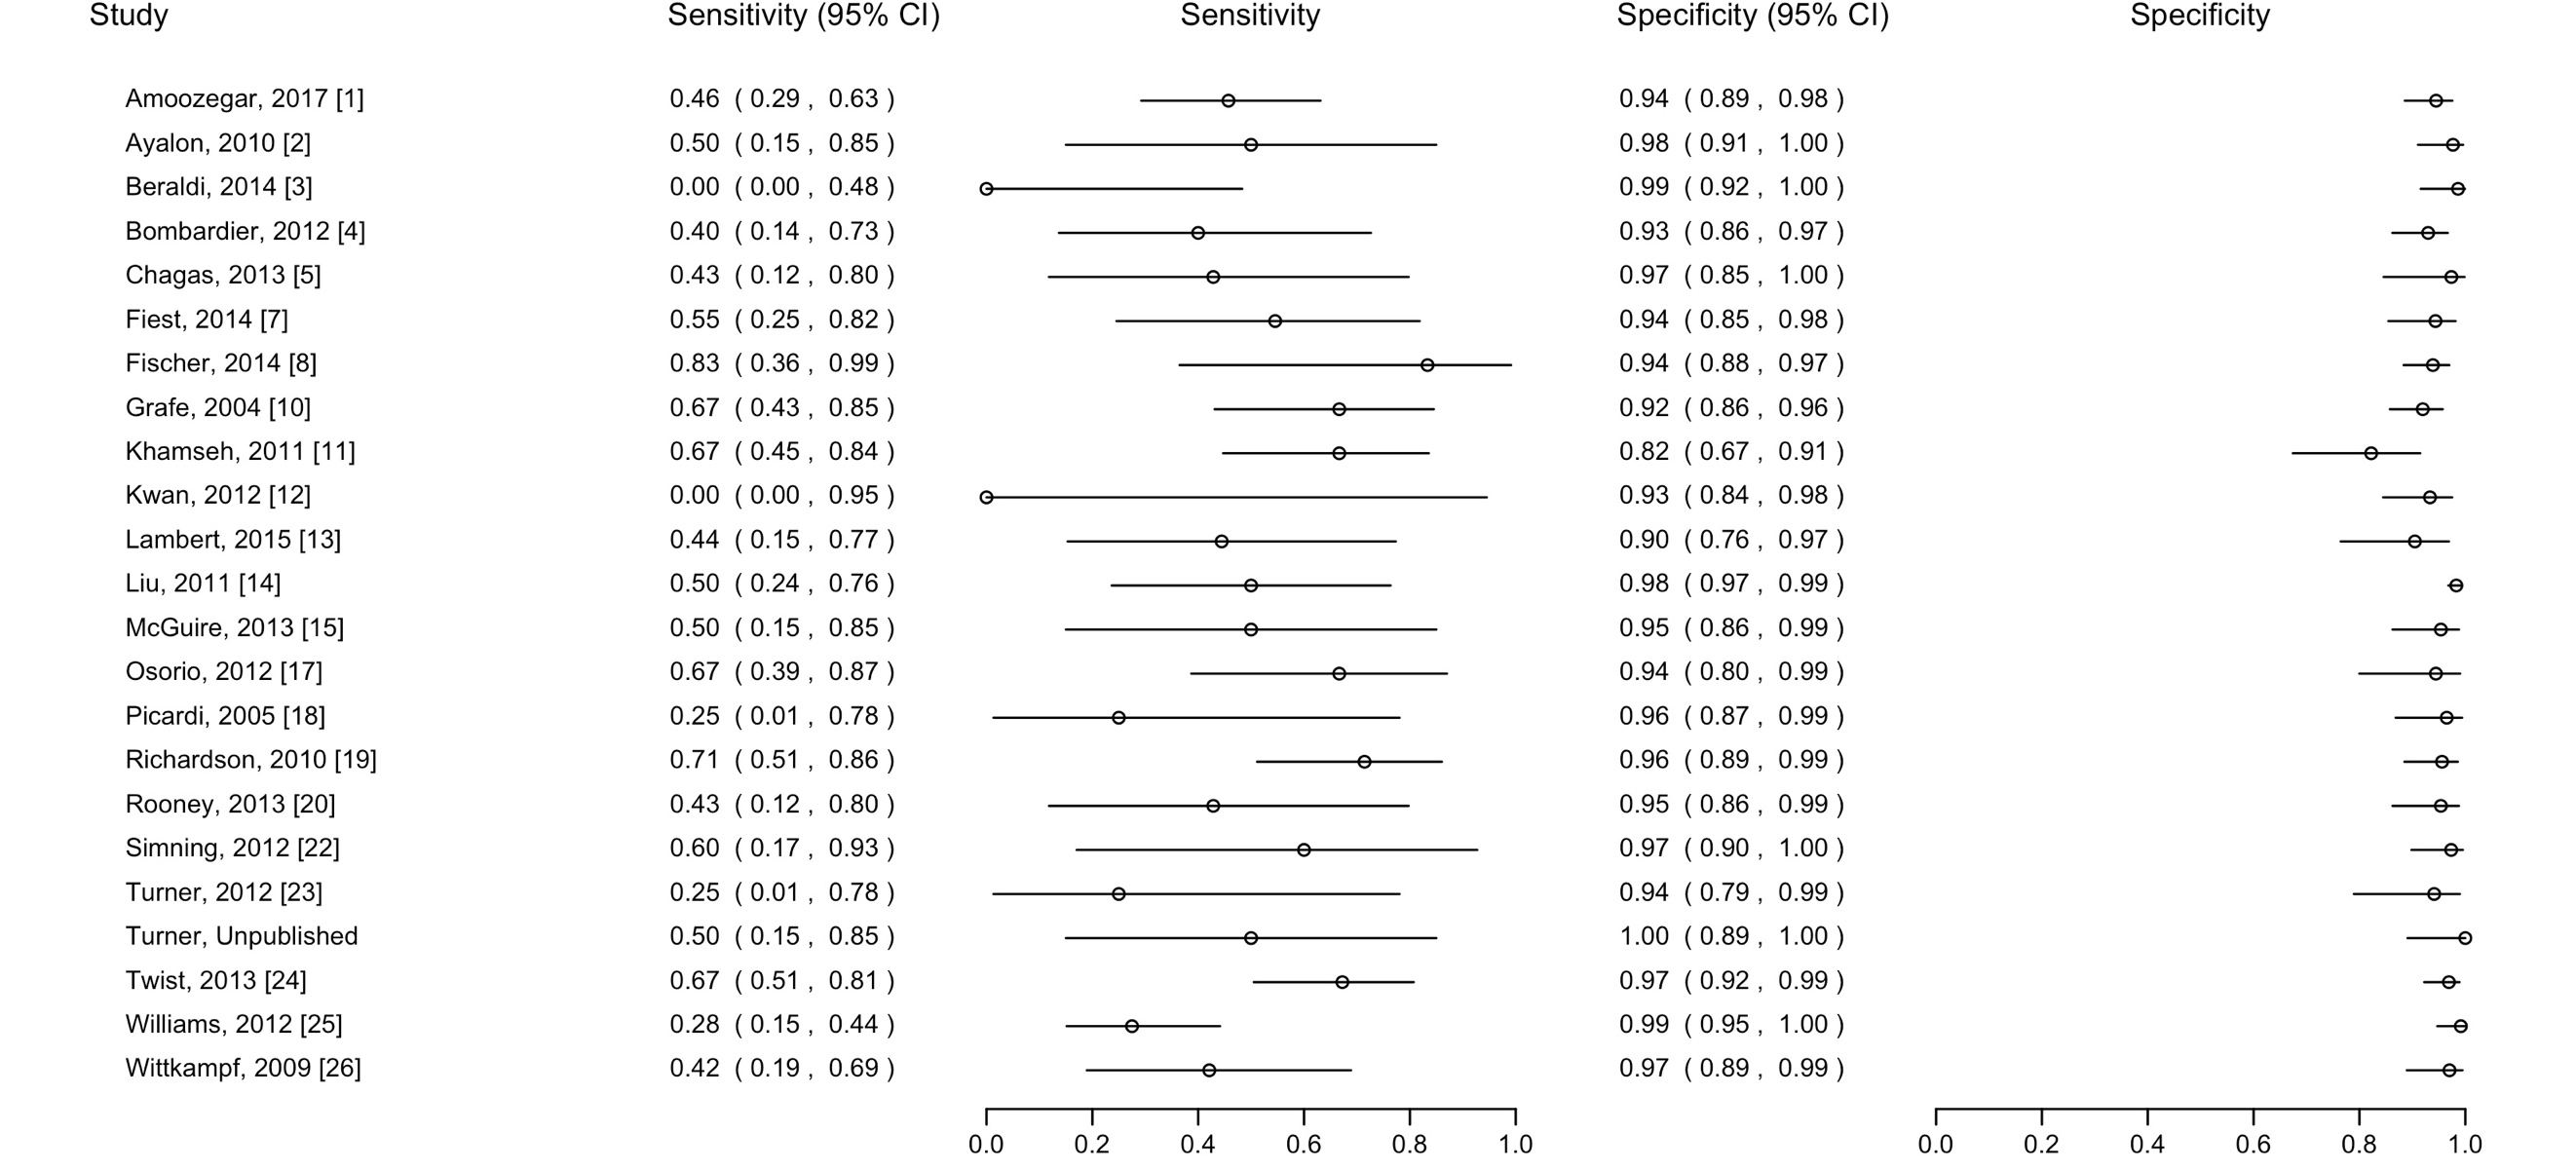


**Supplementary Figure 2f.** Forest plots of sensitivity and specificity estimates for the original diagnostic PHQ-9 algorithm among participants from a country with a very high human development index, among studies that used a semi-structured diagnostic interview as the reference standard (N studies = 23; N participants = 5,863; N major depression = 634)


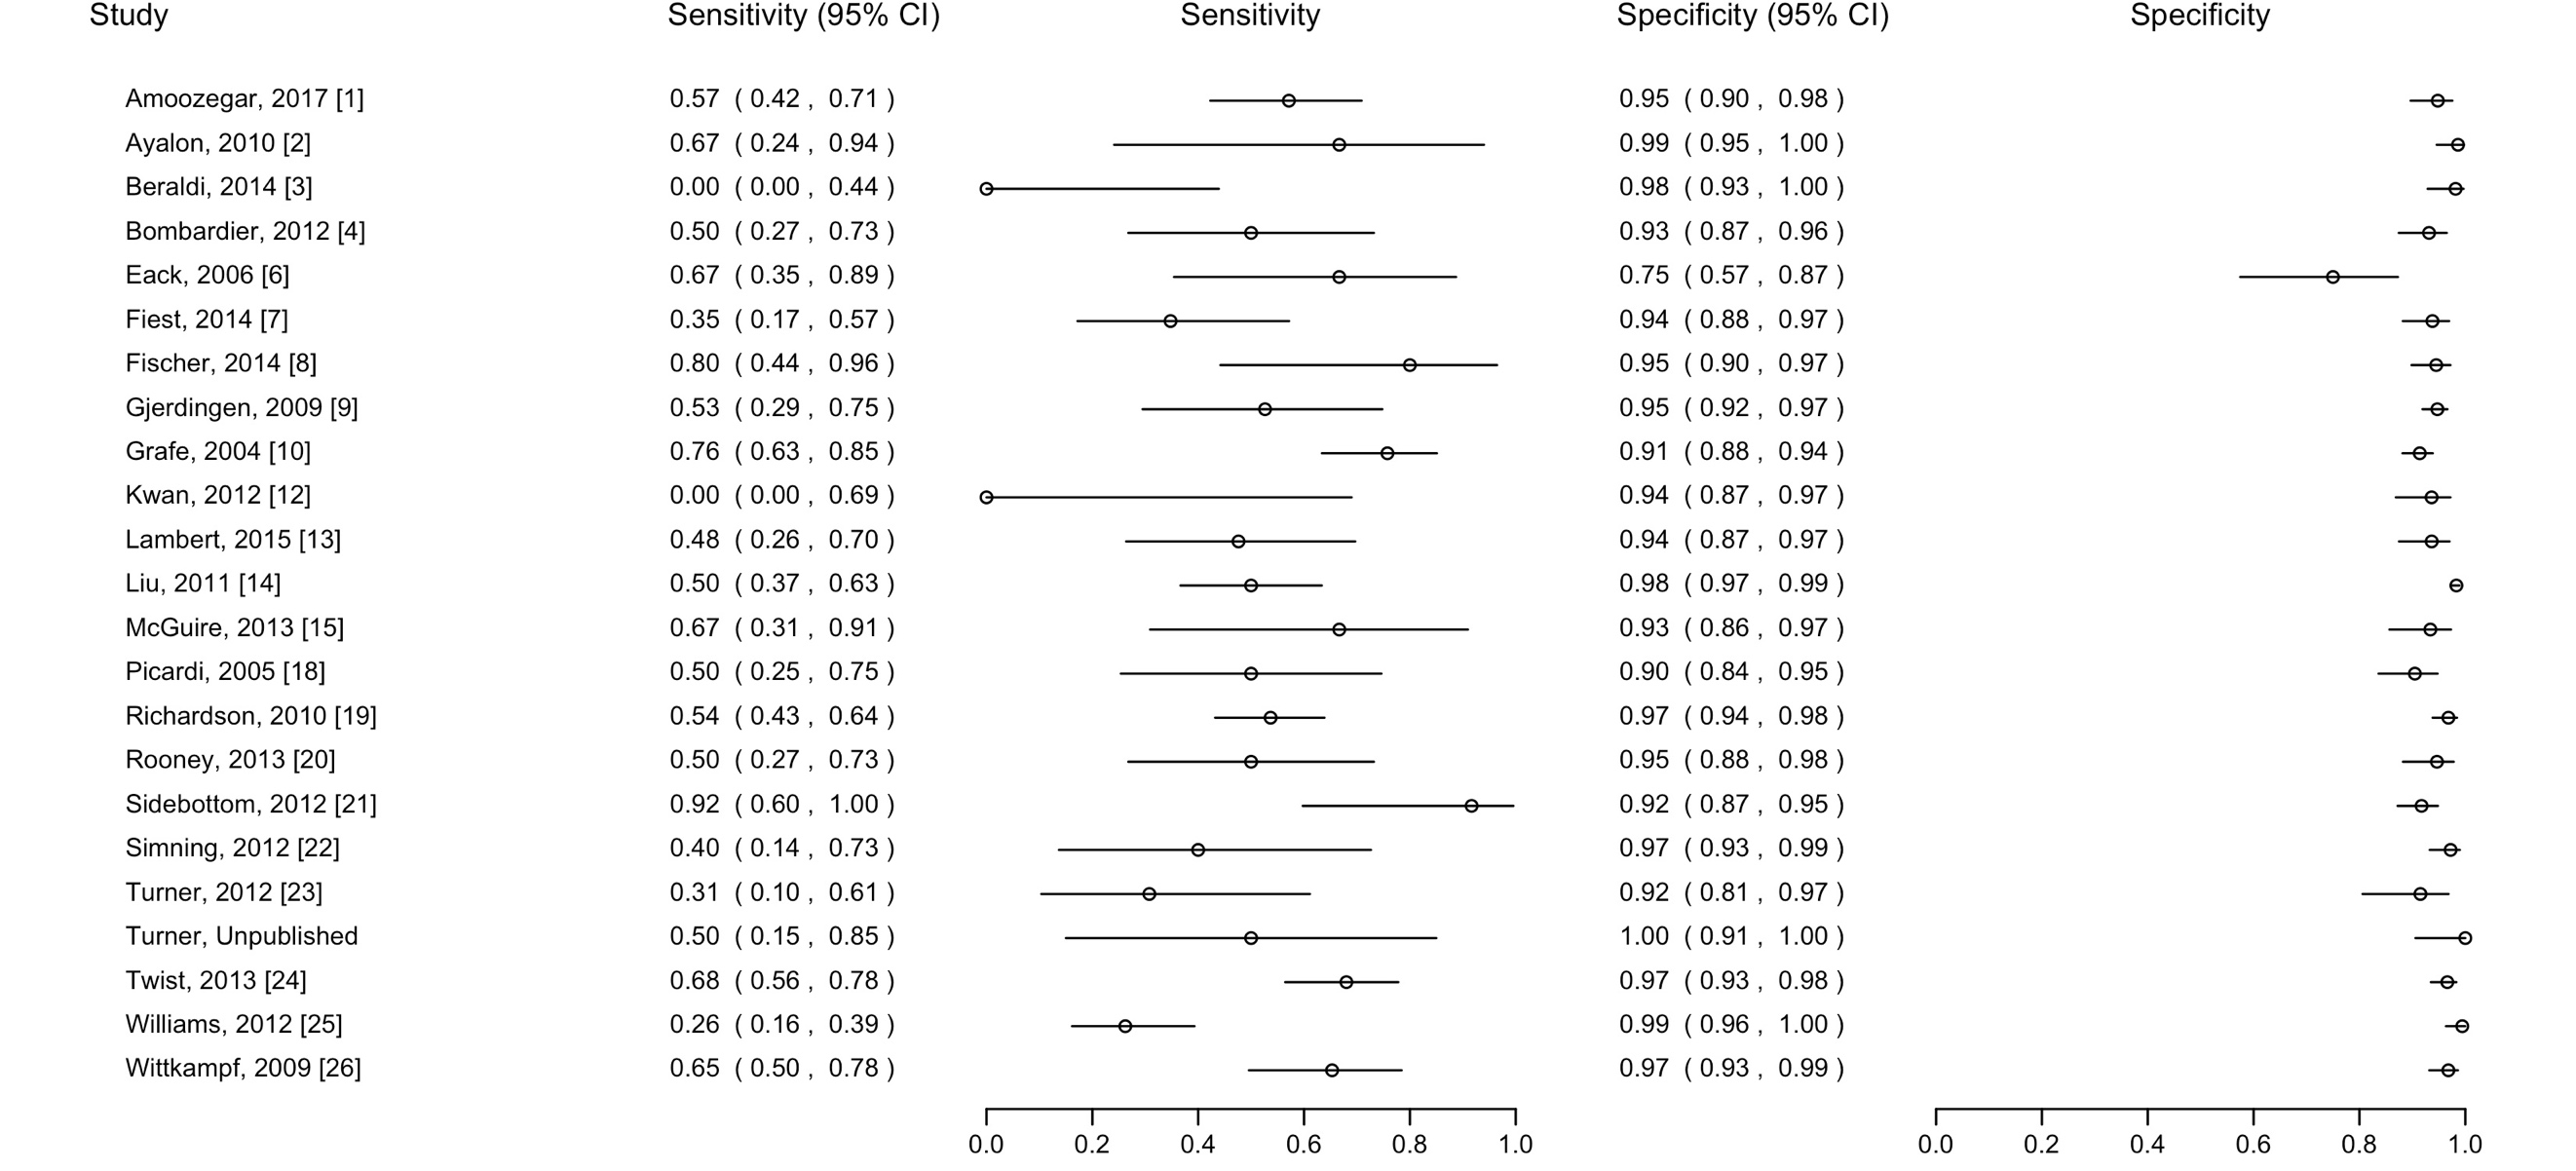


**Supplementary Figure 2g.** Forest plots of sensitivity and specificity estimates for the original diagnostic PHQ-9 algorithm among participants from a country with a low, medium or high-country human development index, among studies that used a semi-structured diagnostic interview as the reference standard (N studies = 4; N participants = 468; N major depression = 153)

**
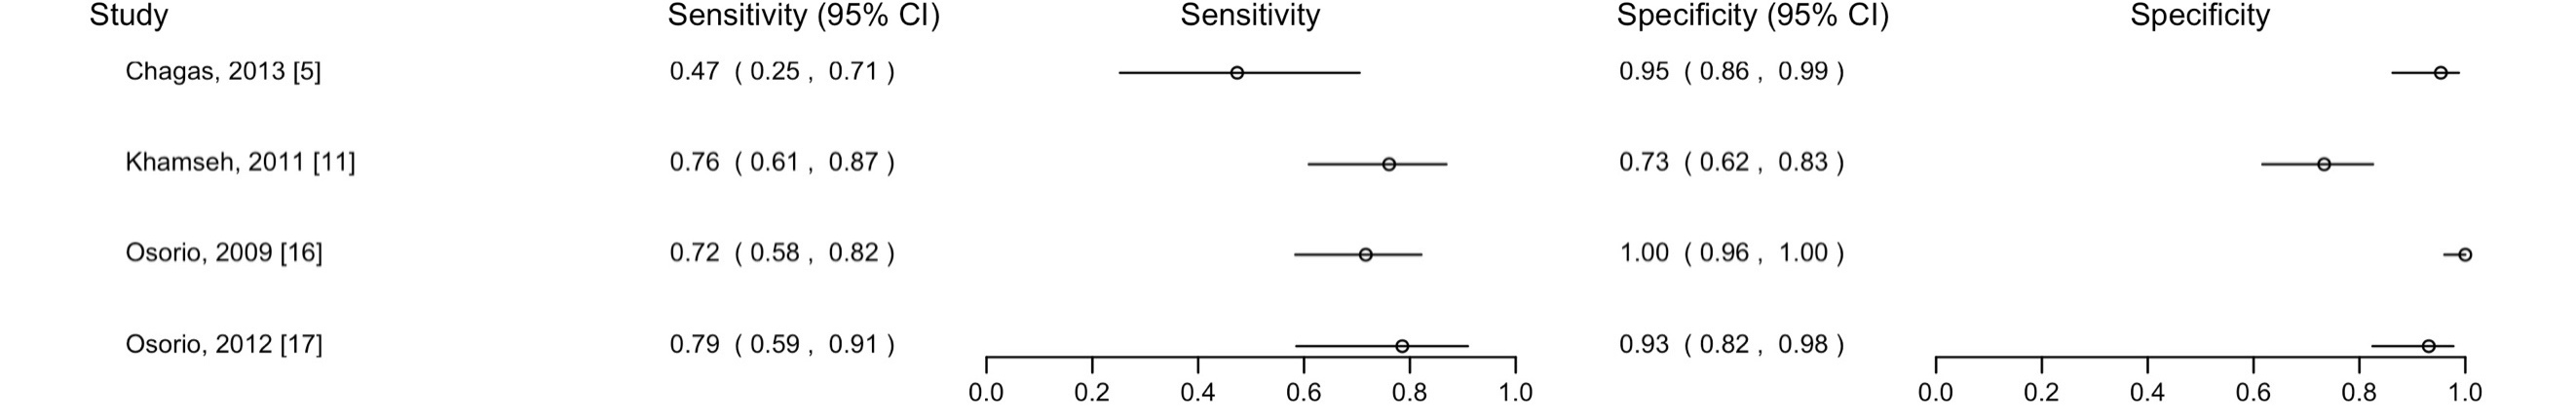
**

**Supplementary Figure 2h.** Forest plots of sensitivity and specificity estimates for the original diagnostic PHQ-9 algorithm among participants from a non-medical setting, among studies that used a semi-structured diagnostic interview as the reference standard (N studies = 2; N participants = 567; N major depression = 105)

**
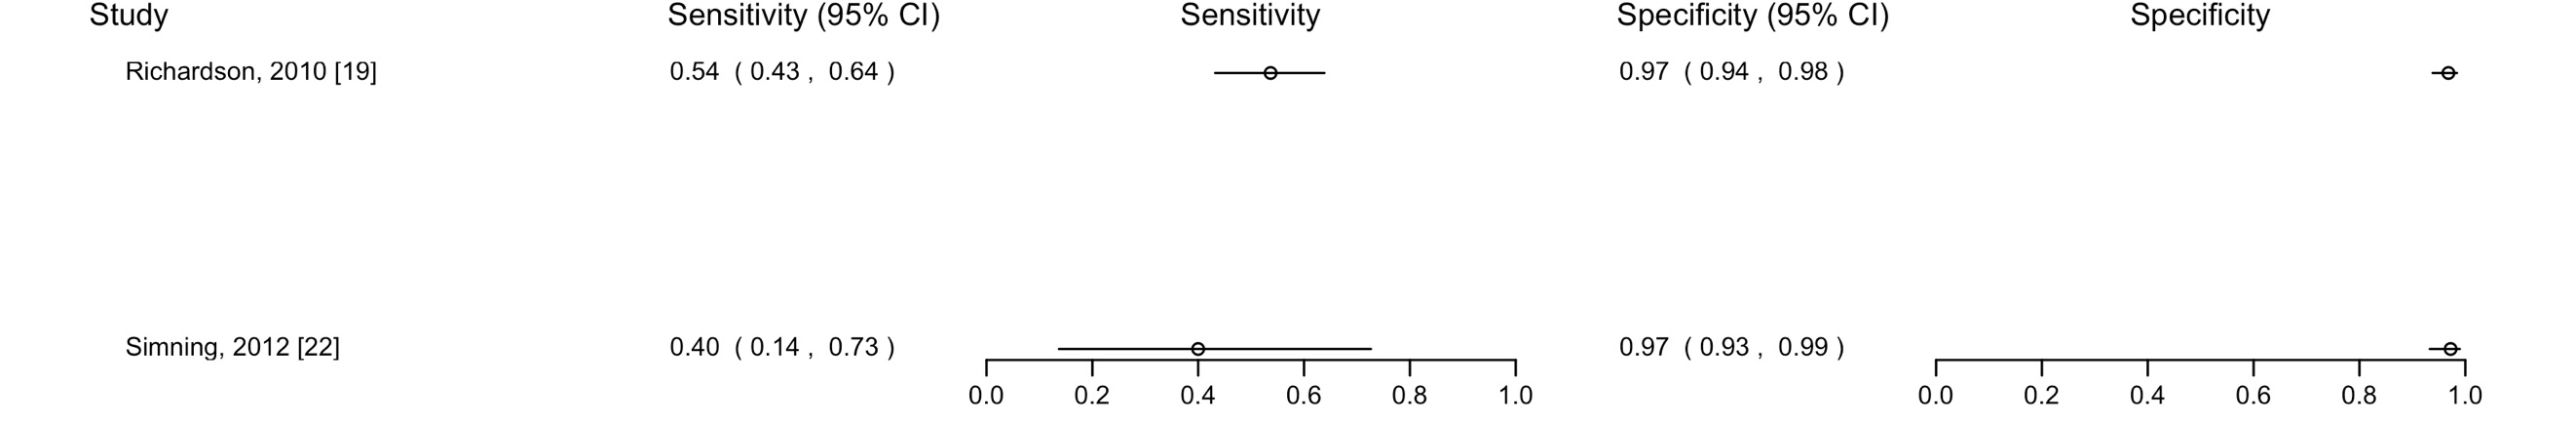
**

**Supplementary Figure 2i.** Forest plots of sensitivity and specificity estimates for the original diagnostic PHQ-9 algorithm among participants from a primary care setting, among studies that used a semi-structured diagnostic interview as the reference standard (N studies = 8; N participants = 2,965; N major depression = 317)

**
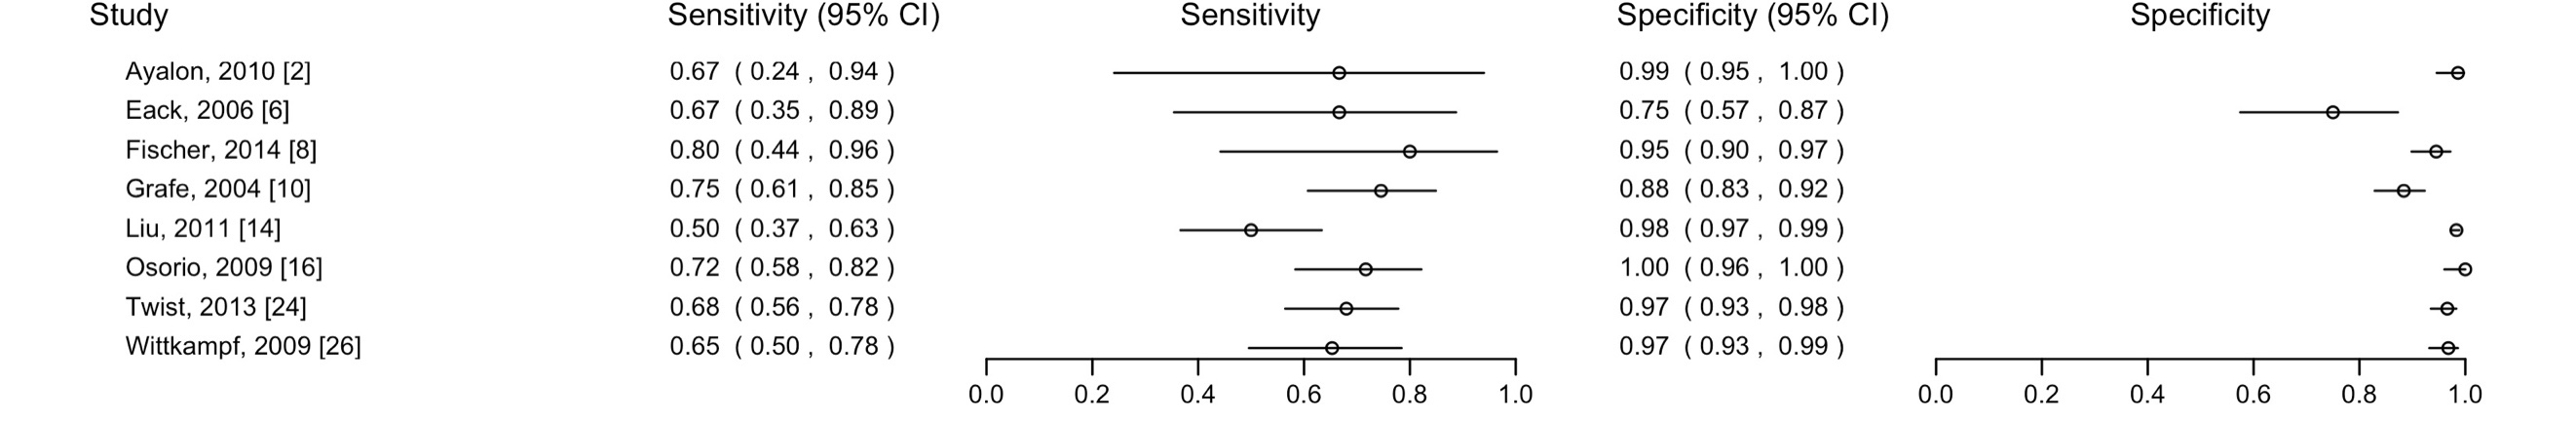
**

**Supplementary Figure 2j.** Forest plots of sensitivity and specificity estimates for the original diagnostic PHQ-9 algorithm among participants from an inpatient specialty care setting, among studies that used a semi-structured diagnostic interview as the reference standard (N studies = 7; N participants = 733; N major depression = 76)


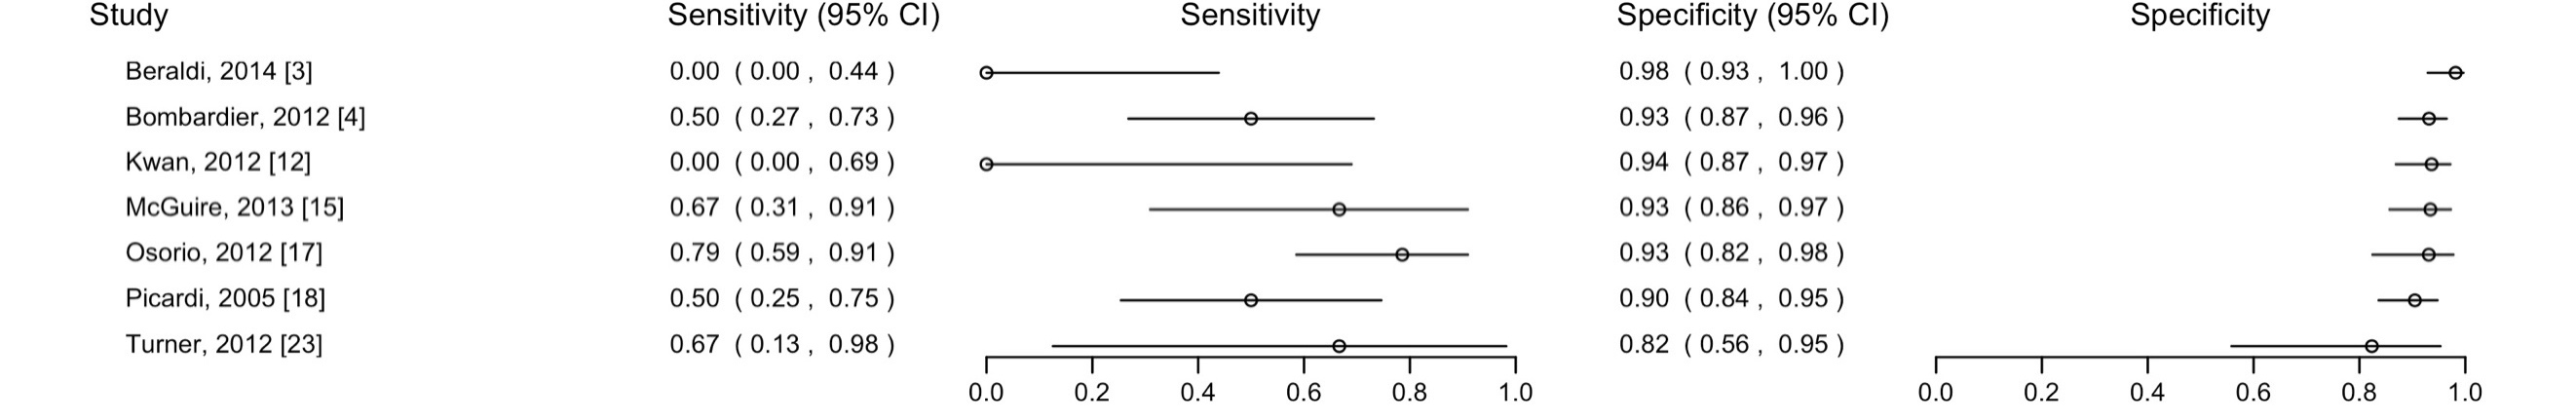


**Supplementary Figure 2k.** Forest plots of sensitivity and specificity estimates the original diagnostic PHQ-9 algorithm among participants from an outpatient specialty care setting, among studies that used a semi-structured diagnostic interview as the reference standard (N studies = 12; N participants = 2,066; N major depression = 289)


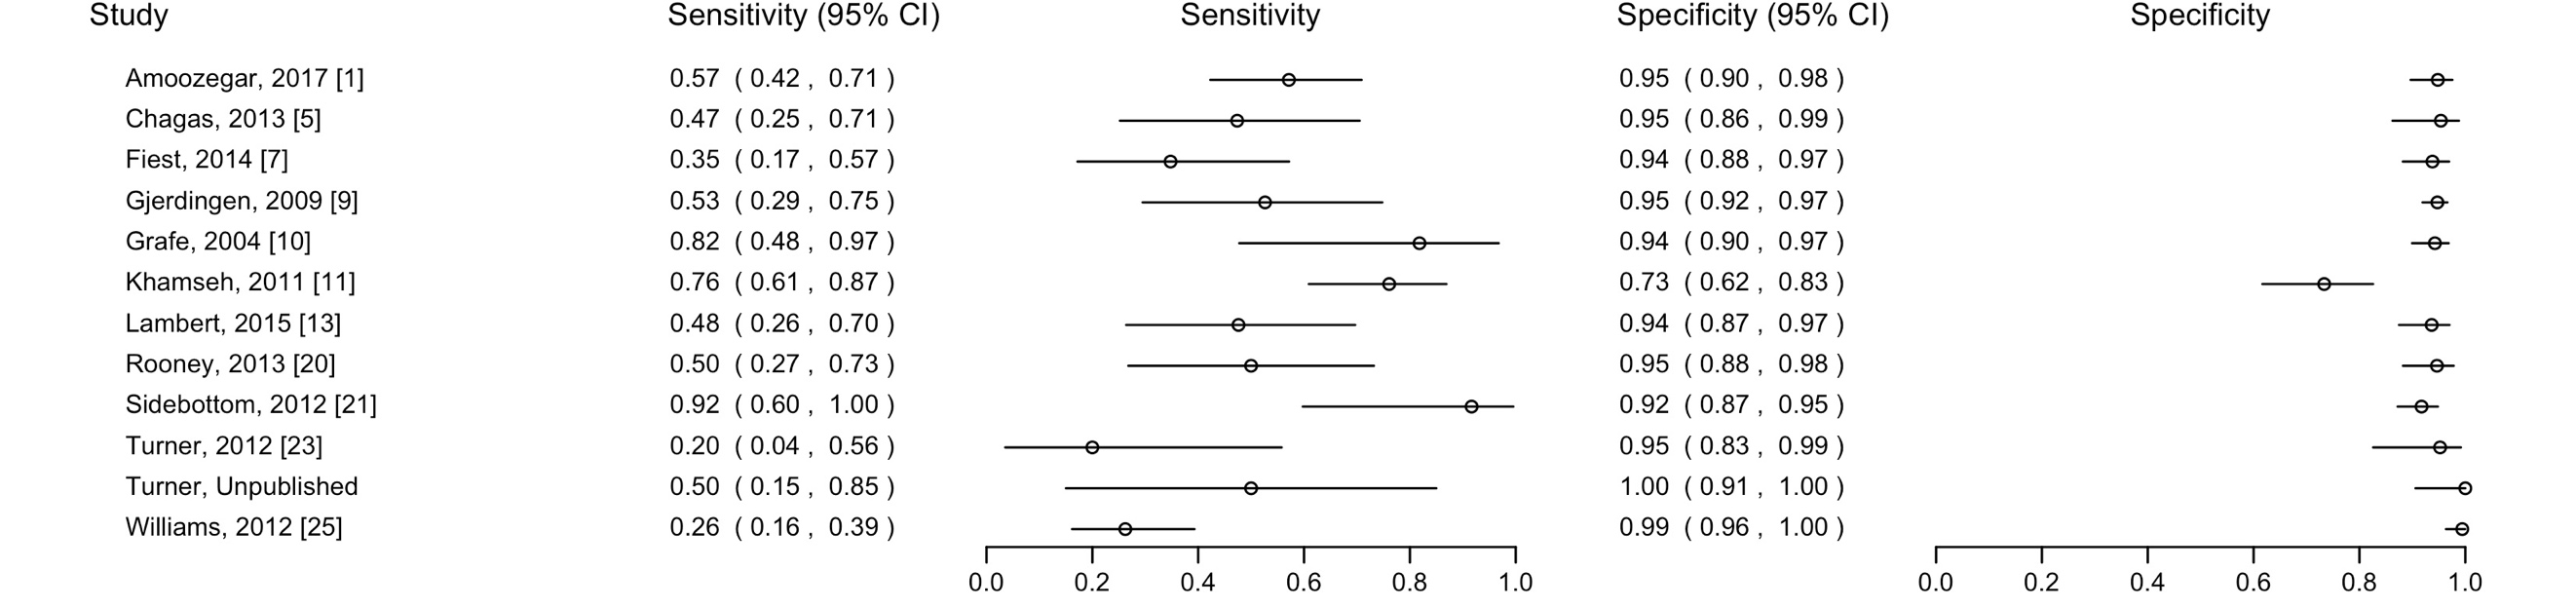


**Supplementary Figure 2l.** Forest plots of sensitivity and specificity estimates for the original diagnostic PHQ-9 algorithm, among studies that used a fully structured diagnostic interview as the reference standard (N studies = 13; N participants = 7,577; N major depression = 788)


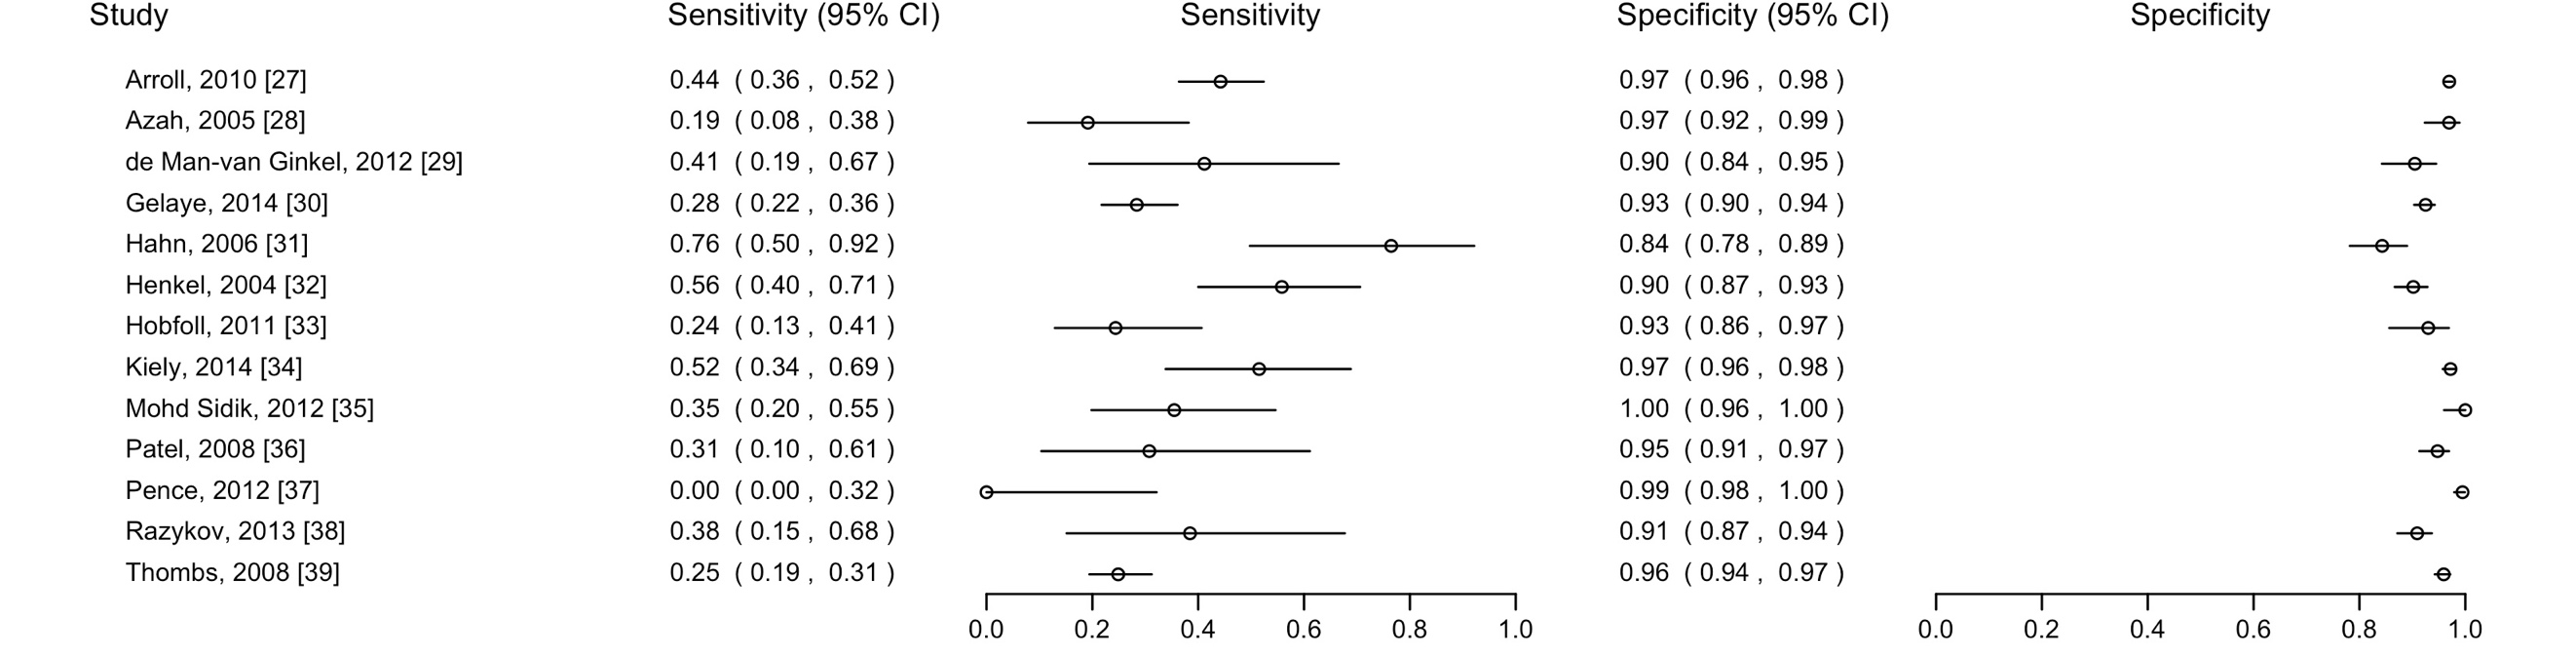


**Supplementary Figure 2m.** Forest plots of sensitivity and specificity estimates for the original diagnostic PHQ-9 algorithm among participants aged <60, among studies that used a fully structured diagnostic interview as the reference standard (N studies = 13; N participants = 5,401; N major depression = 594)

**
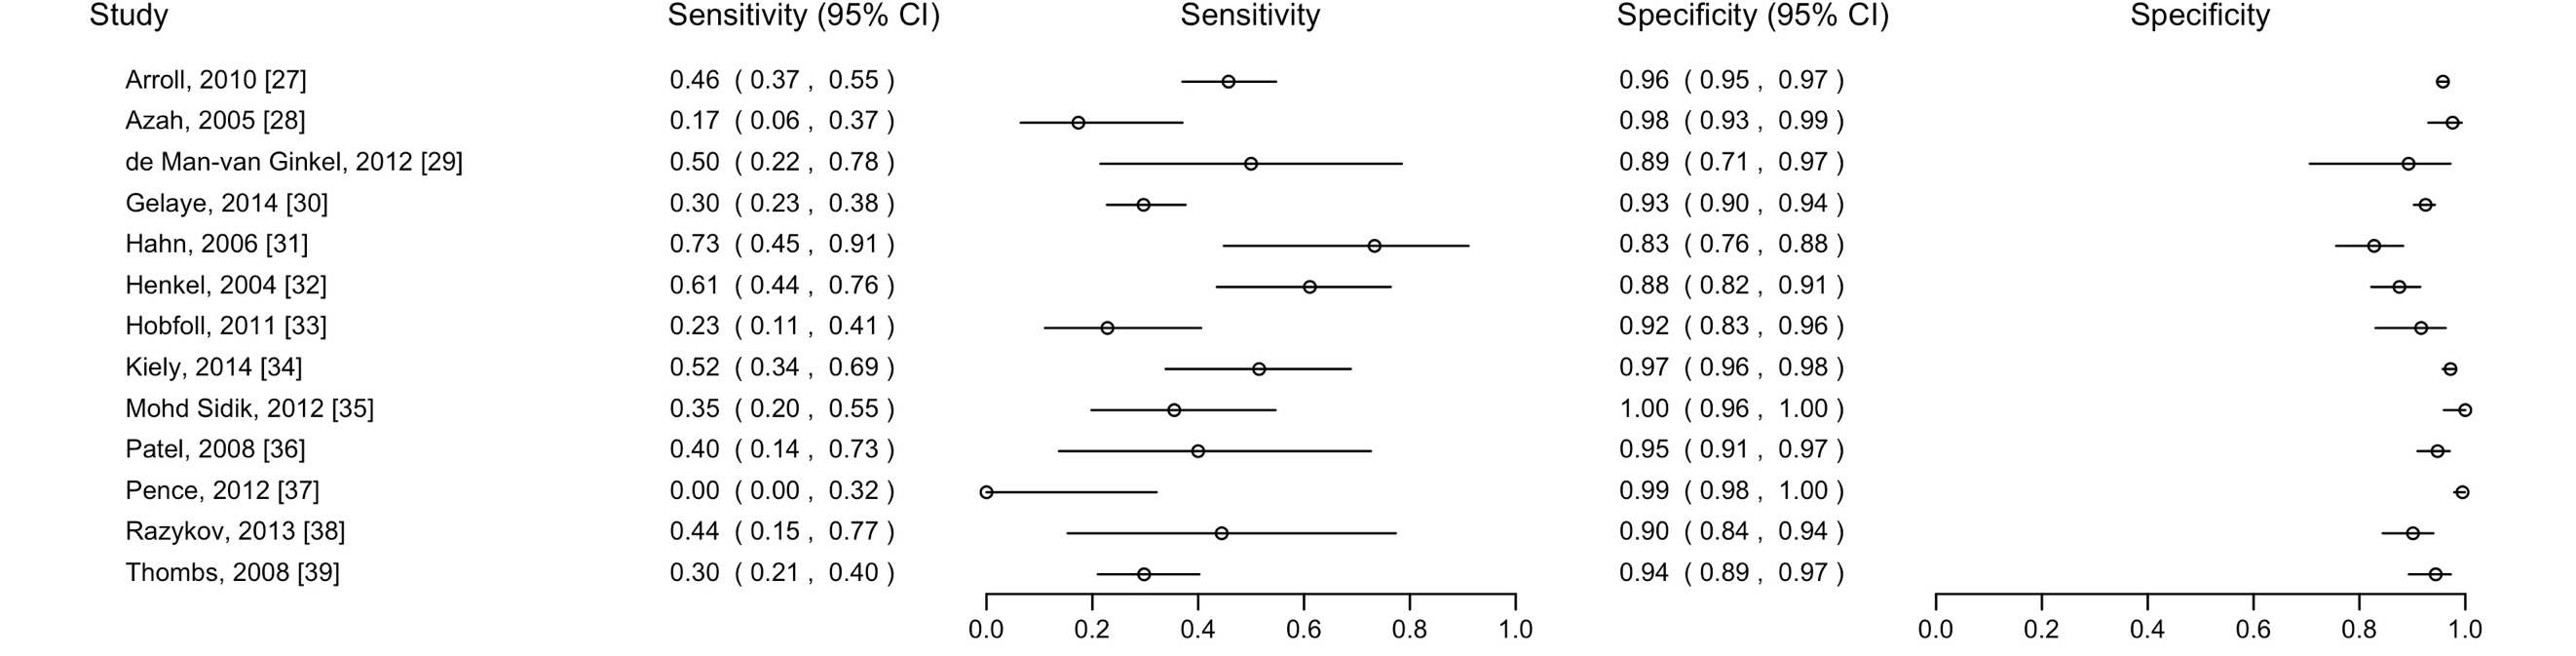
**

**Supplementary Figure 2n.** Forest plots of sensitivity and specificity estimates for the original diagnostic PHQ-9 algorithm among participants aged ≥60, among studies that used a fully structured diagnostic interview as the reference standard (N studies = 10; N participants = 2,175; N major depression = 194)

**
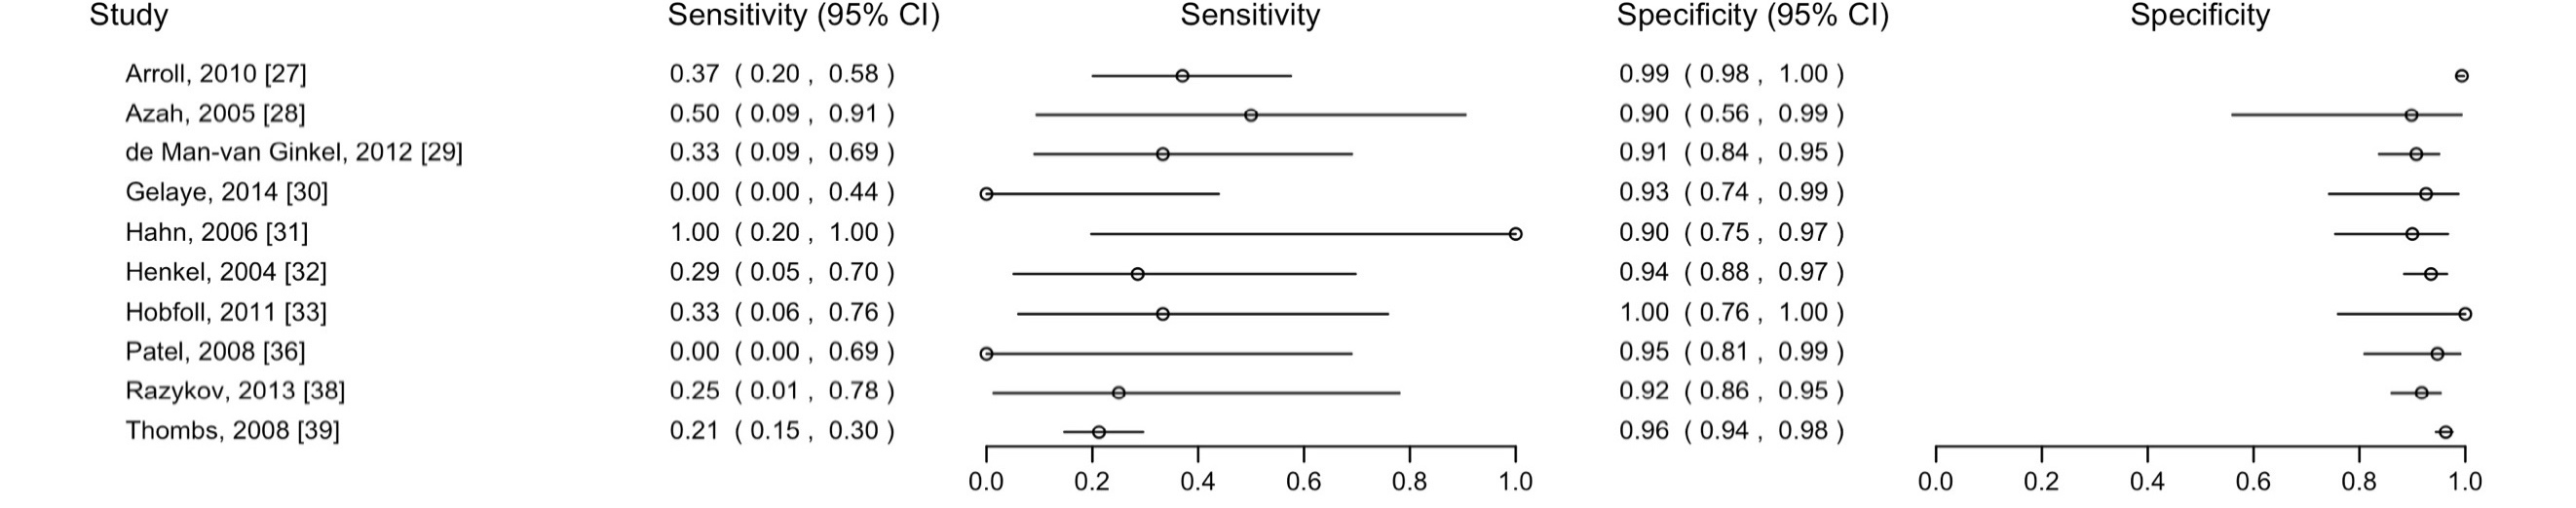
**

**Supplementary Figure 2o.** Forest plots of sensitivity and specificity estimates for the original diagnostic PHQ-9 algorithm among women, among studies that used a fully structured diagnostic interview as the reference standard (N studies = 13; N participants = 4,261; N major depression = 456)


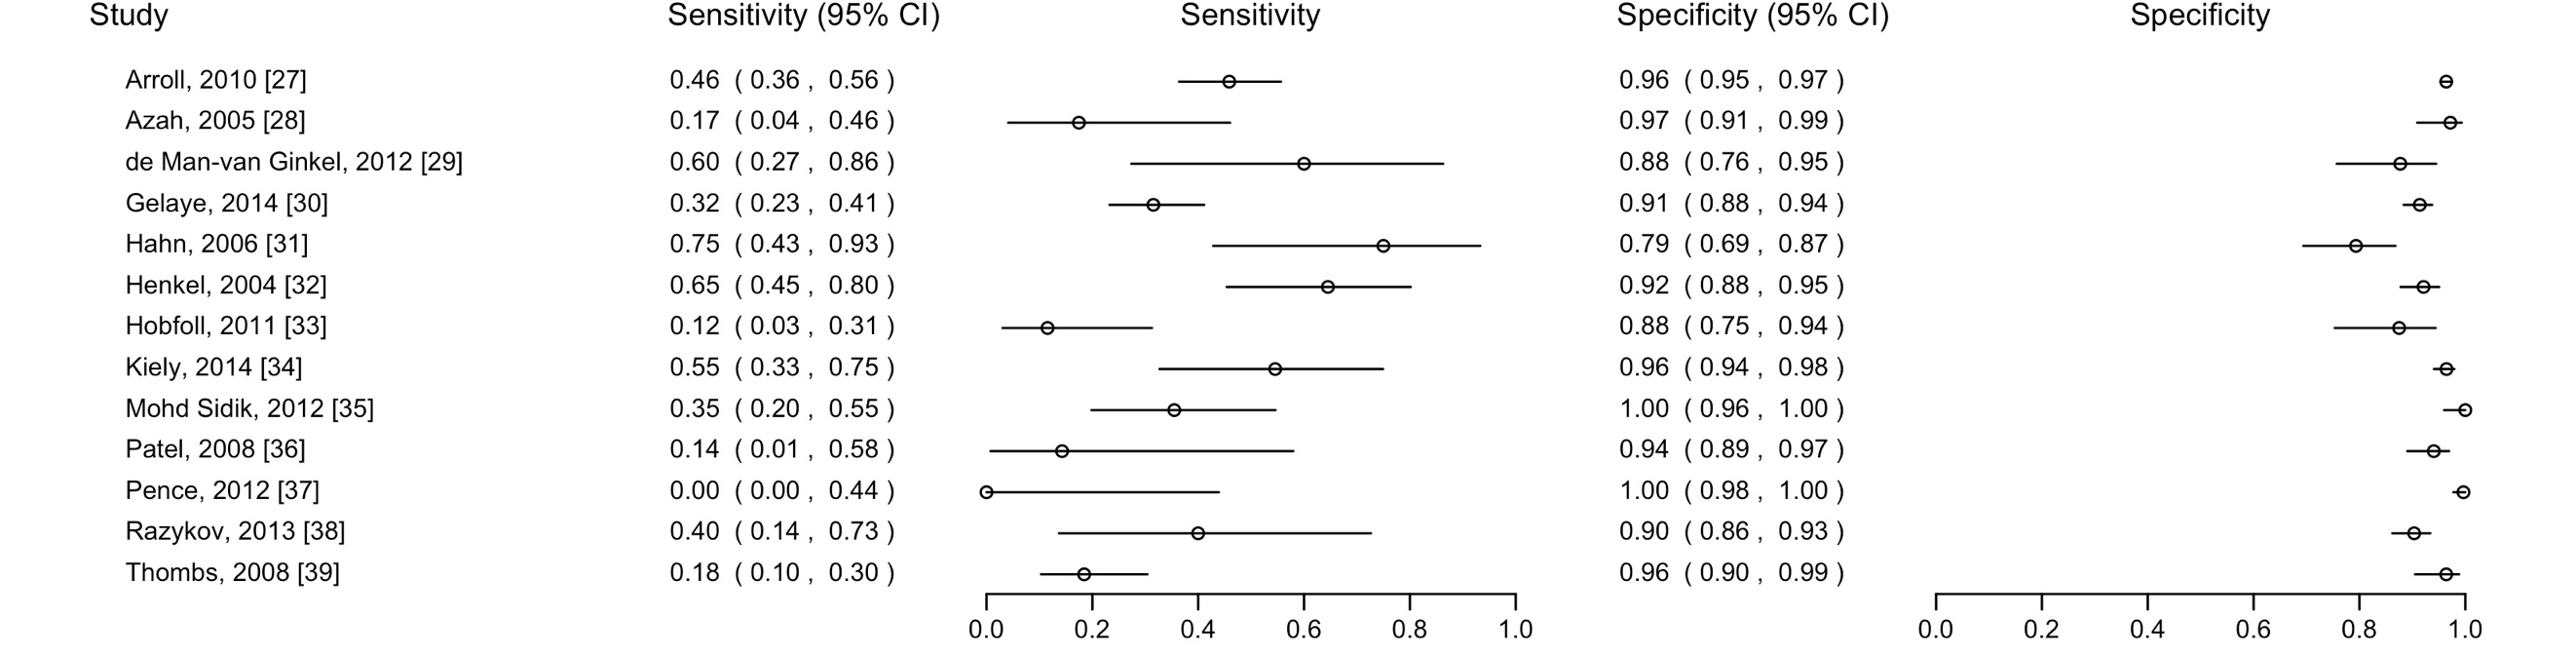


**Supplementary Figure 2p.** Forest plots of sensitivity and specificity estimates for the original diagnostic PHQ-9 algorithm among men, among studies that used a fully structured diagnostic interview as the reference standard (N studies = 12; N participants = 3,316; N major depression = 332)

**
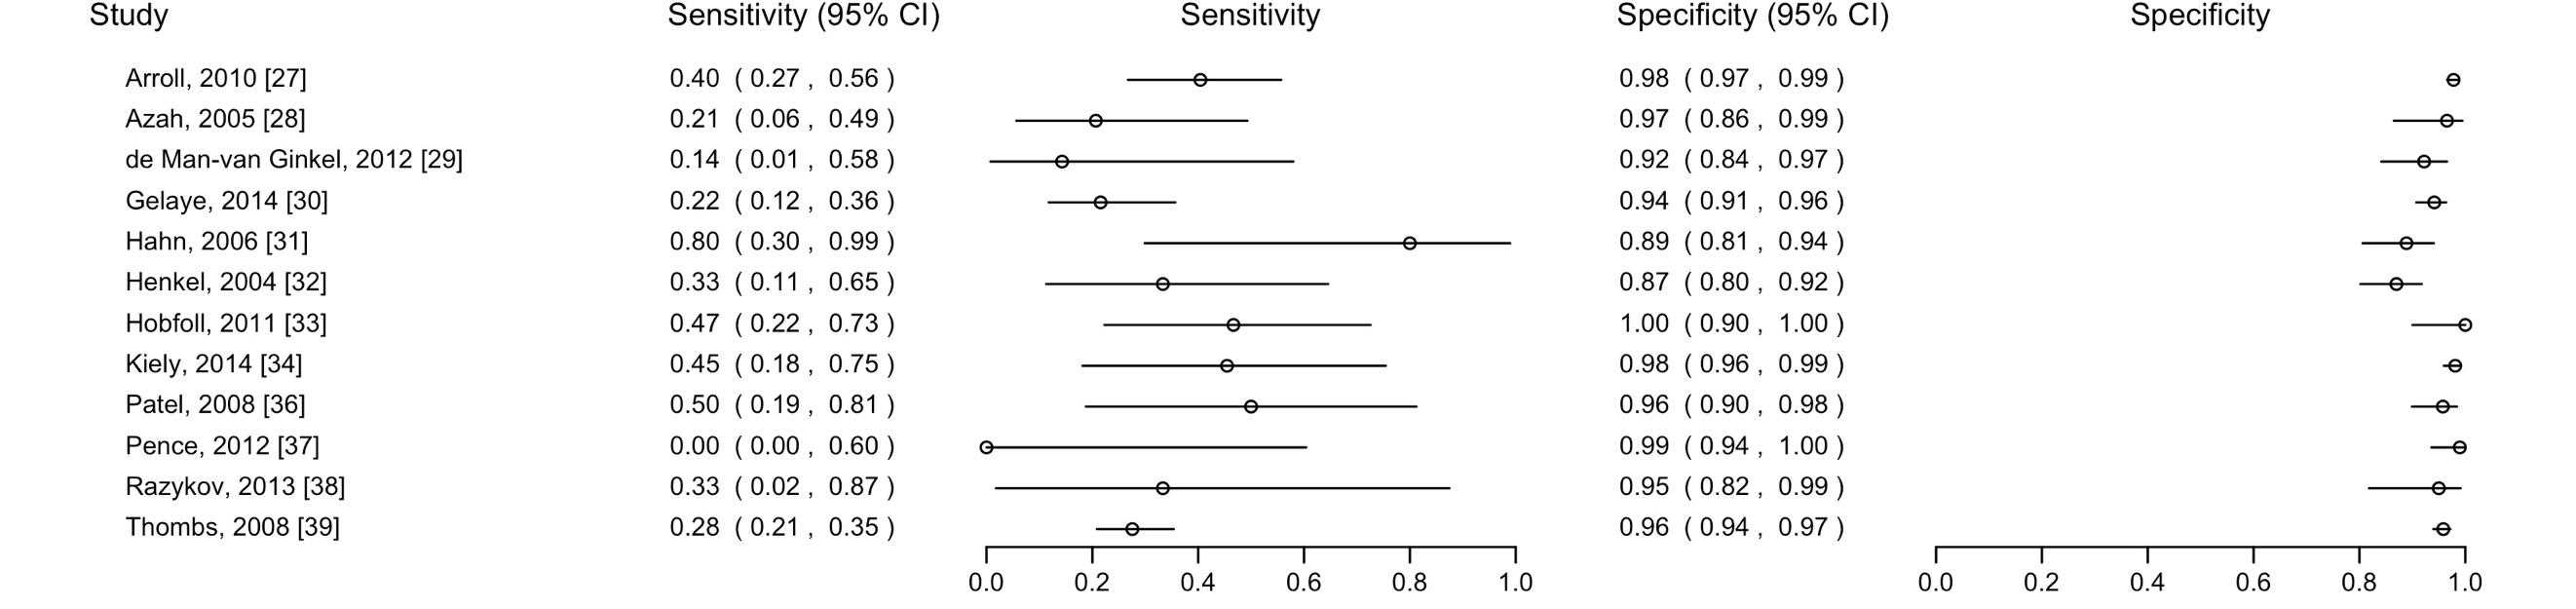
**

**Supplementary Figure 2q.** Forest plots of sensitivity and specificity estimates for the original diagnostic PHQ-9 algorithm among participants from a country with a very high human development index, among studies that used a fully structured diagnostic interview as the reference standard (N studies = 8; N participants = 5,637; N major depression = 541)

**
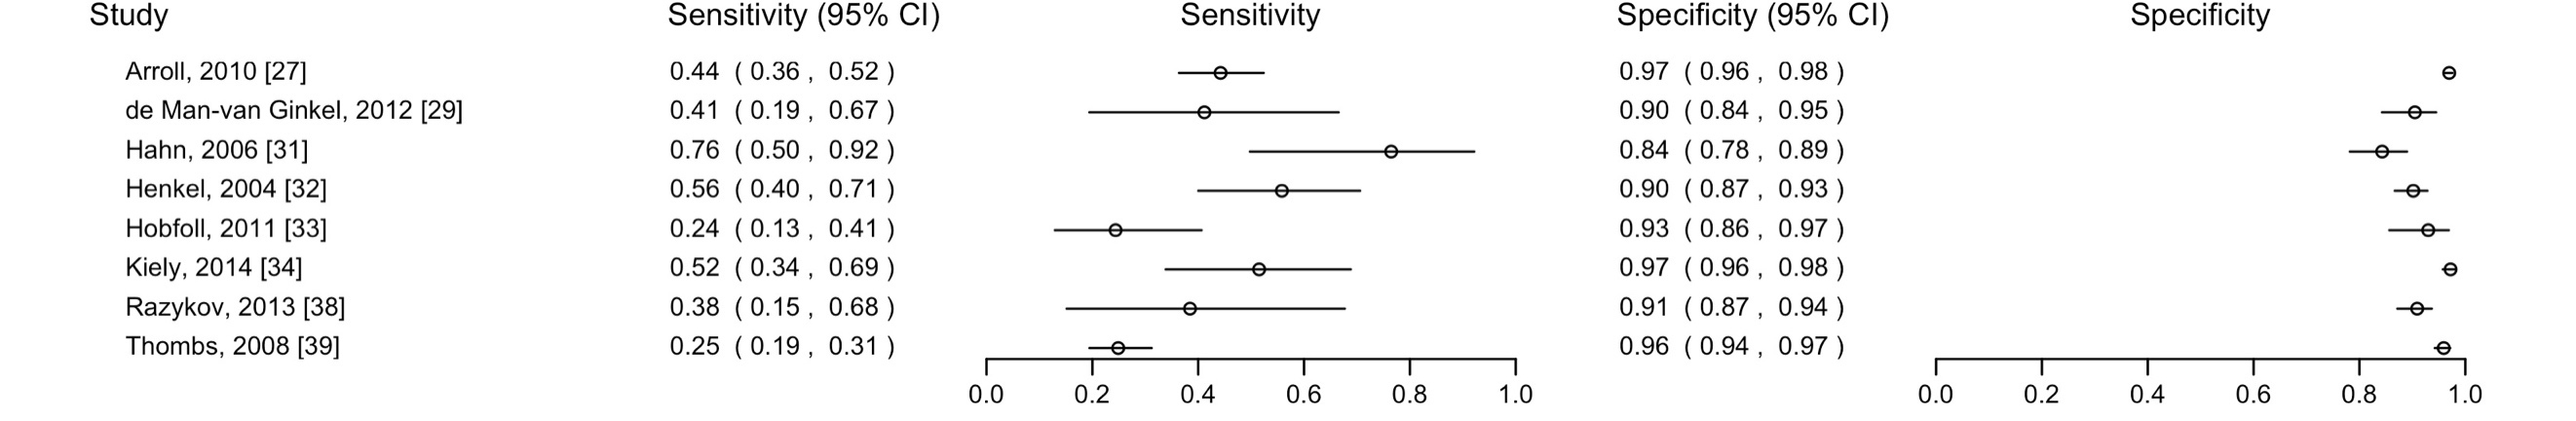
**

**Supplementary Figure 2r.** Forest plots of sensitivity and specificity estimates for the original diagnostic PHQ-9 algorithm among participants from a country with a low, medium or high-country human development index, among studies that used a fully structured diagnostic interview as the reference standard (N studies = 5; N participants = 1,940; N major depression = 247)


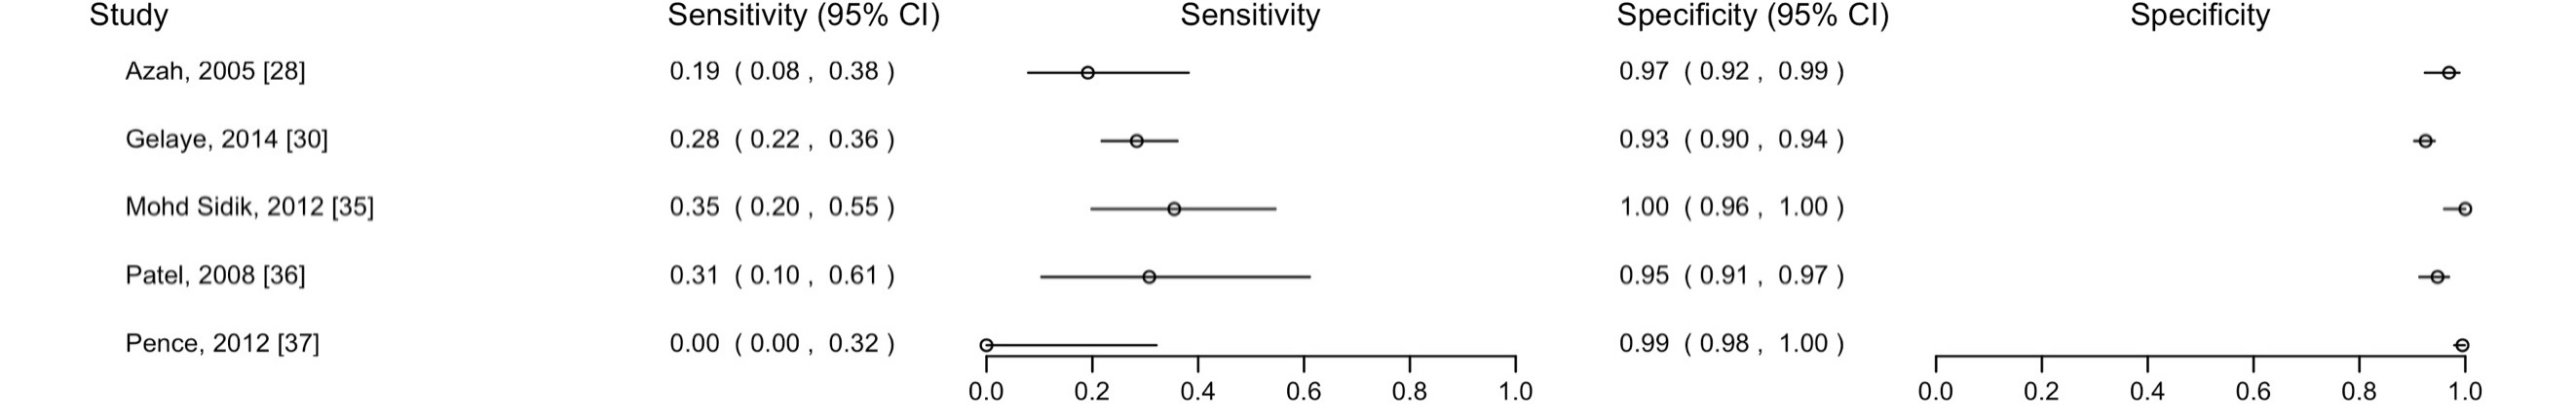


**Supplementary Figure 2s.** Forest plots of sensitivity and specificity estimates for the original diagnostic PHQ-9 algorithm among participants from a non-medical setting, among studies that used a fully structured diagnostic interview as the reference standard (N studies = 2; N participants = 963; N major depression = 74)


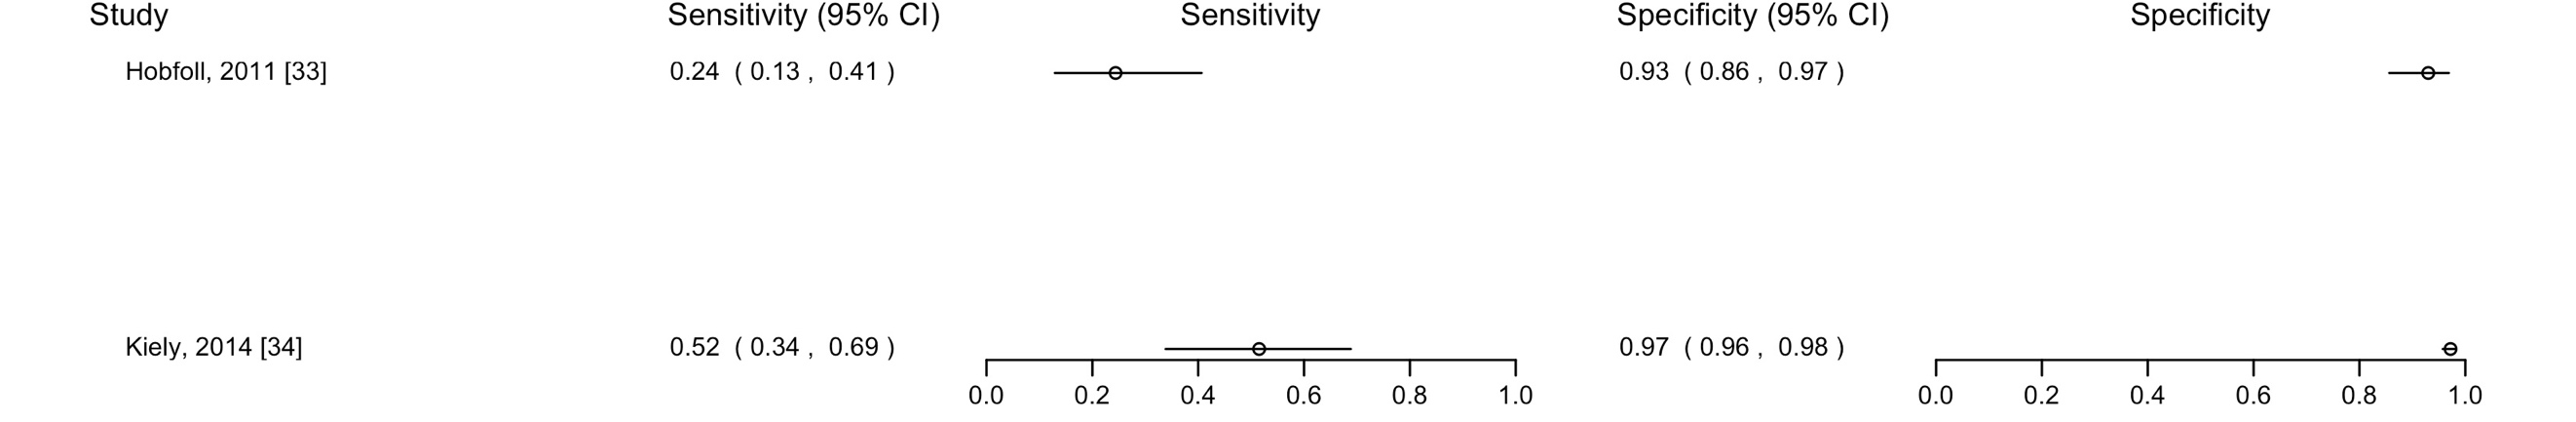


**Supplementary Figure 2t.** Forest plots of sensitivity and specificity estimates for the original diagnostic PHQ-9 algorithm among participants from a primary care setting, among studies that used a fully structured diagnostic interview as the reference standard (N studies = 5; N participants = 3,578; N major depression = 273)


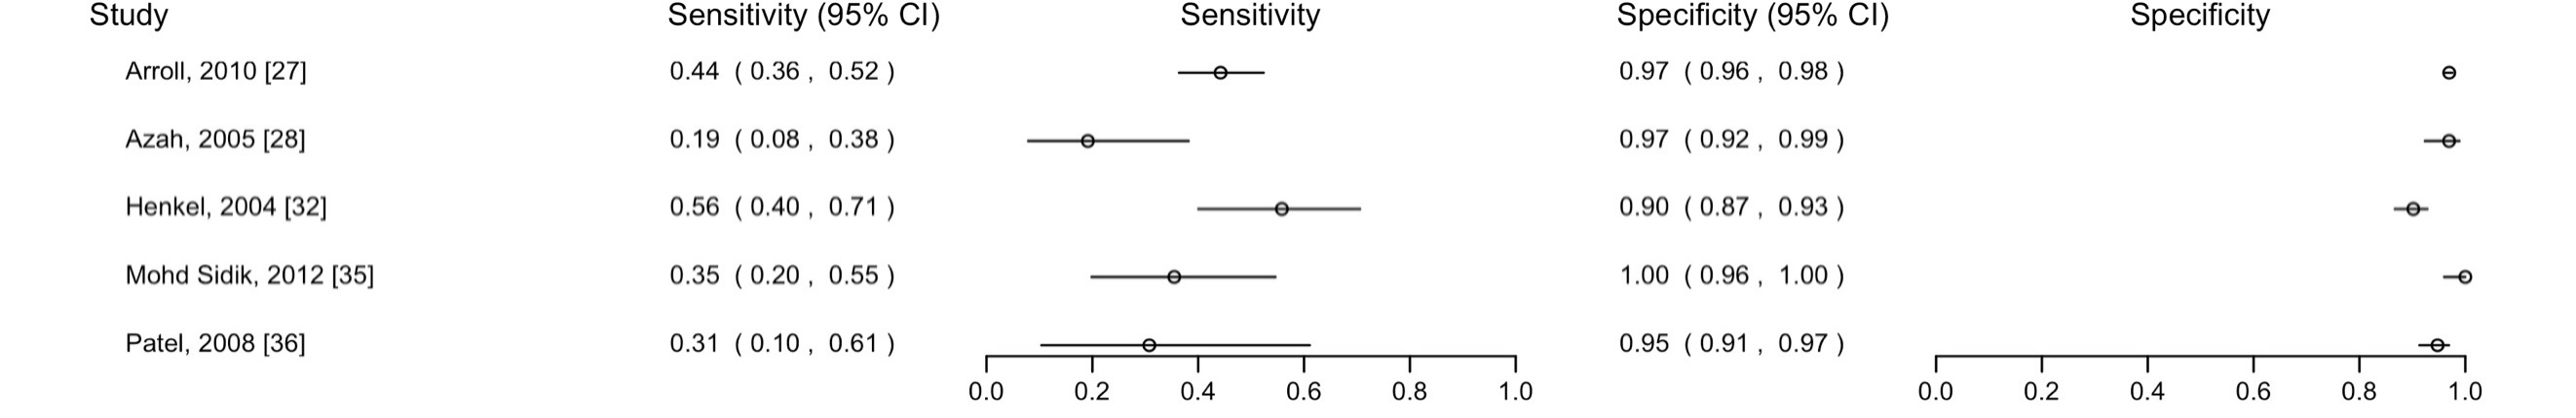


**Supplementary Figure 2u.** Forest plots of sensitivity and specificity estimates for the original diagnostic PHQ-9 algorithm among participants from an inpatient specialty care setting, among studies that used a fully structured diagnostic interview as the reference standard (N studies = 2; N participants = 372; N major depression = 34)

**
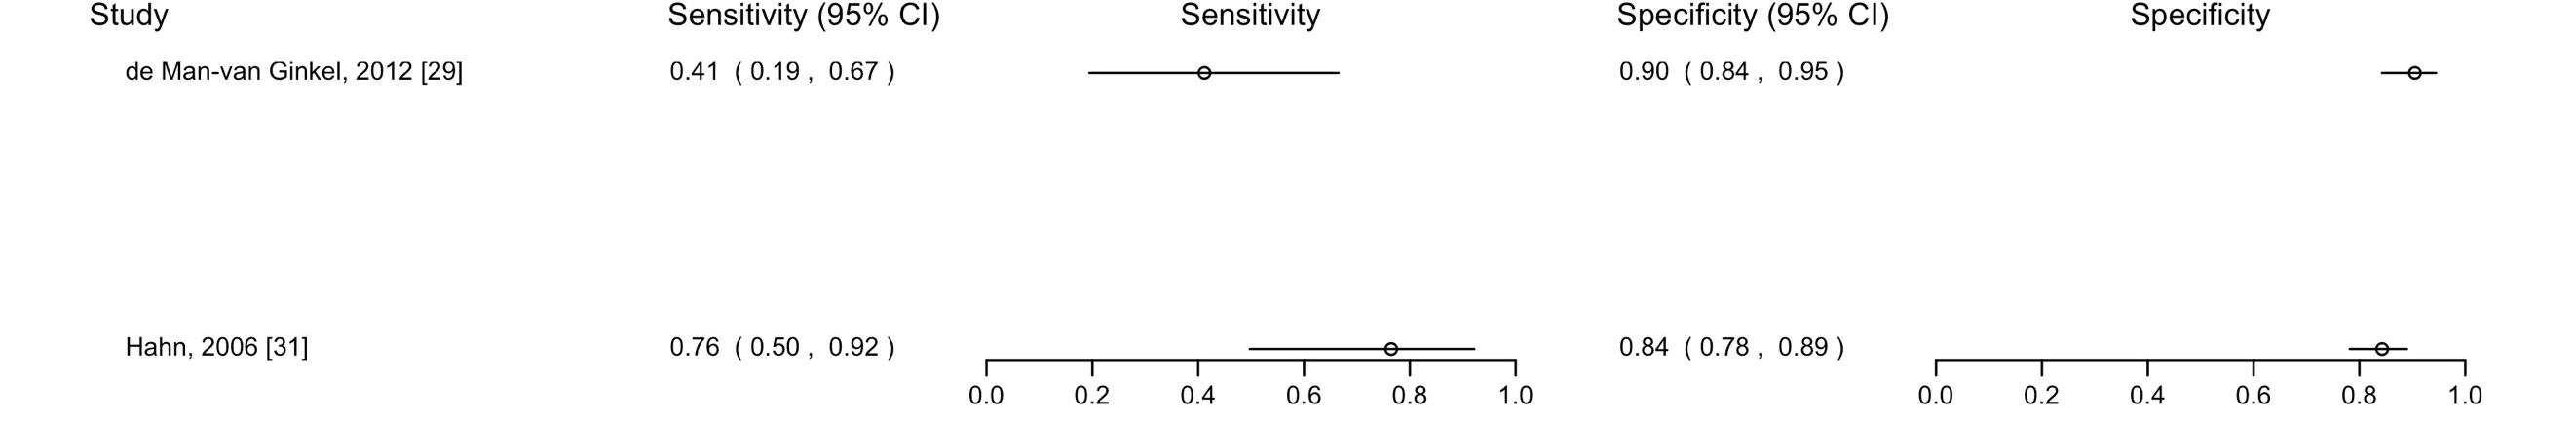
**

**Supplementary Figure 2v.** Forest plots of sensitivity and specificity estimates for the original diagnostic PHQ-9 algorithm among participants from an outpatient specialty care setting, among studies that used a fully structured diagnostic interview as the reference standard (N studies = 4; N participants = 2,664; N major depression = 407)

**
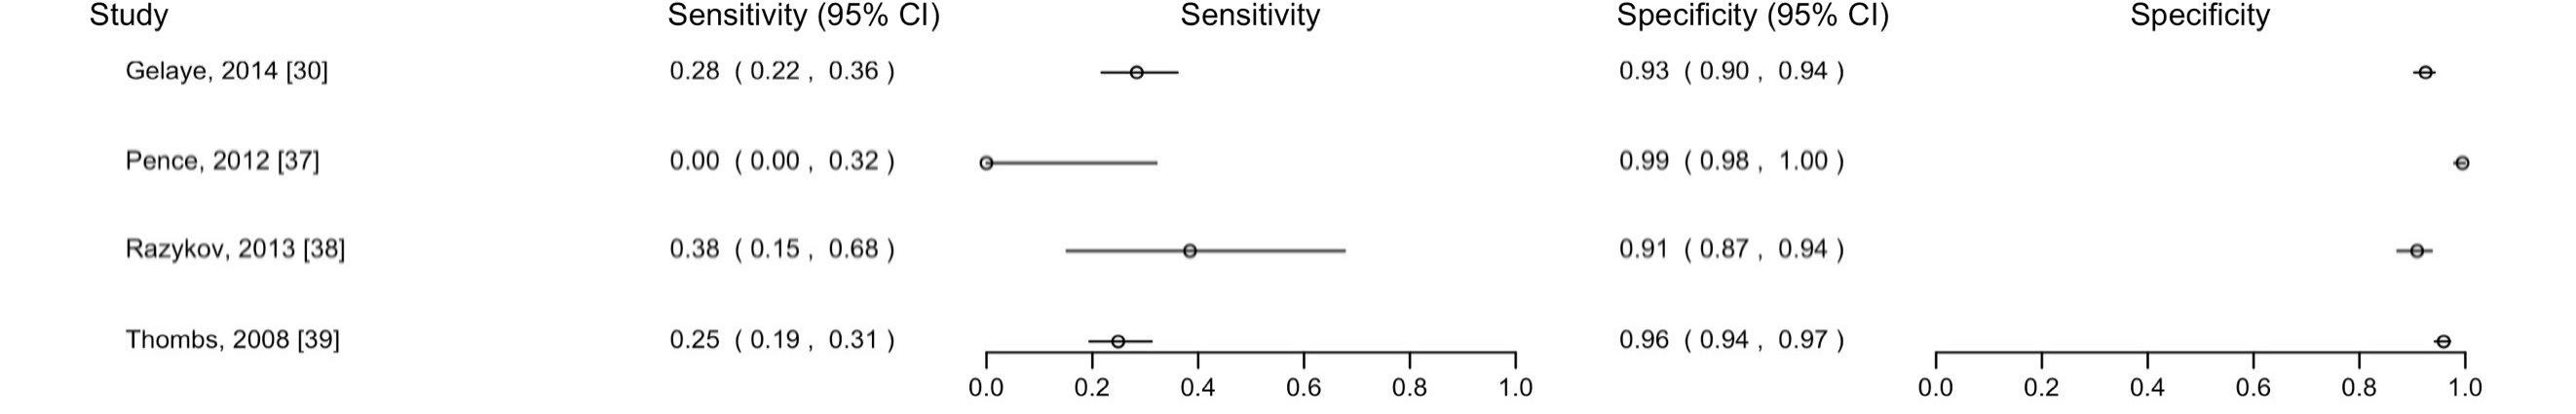
**

**Supplementary Figure 2w.** Forest plots of sensitivity and specificity estimates for the original diagnostic PHQ-9 algorithm, among studies that used the MINI as the reference standard (N studies = 14; N participants = 2,780; N major depression = 516)

**
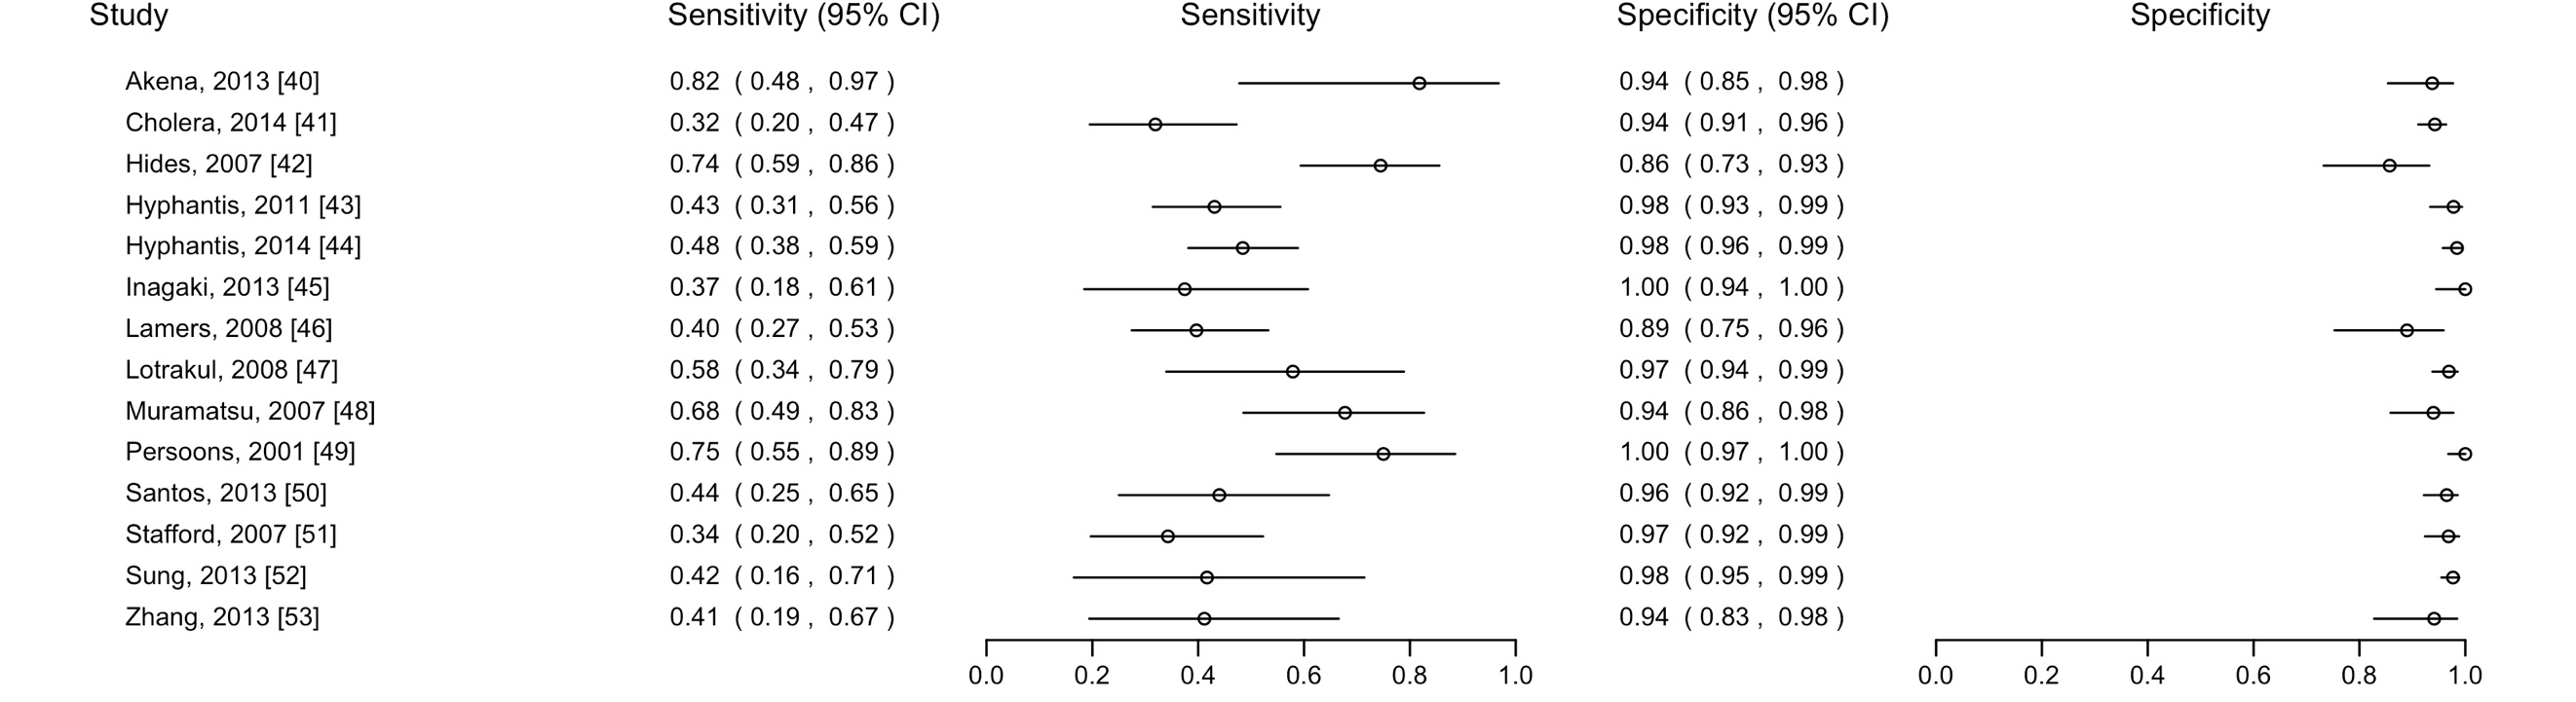
**

**Supplementary Figure 2x.** Forest plots of sensitivity and specificity estimates for the original diagnostic PHQ-9 algorithm among participants aged <60, among studies that used the MINI as the reference standard (N studies = 13; N participants = 1,885; N major depression = 290)


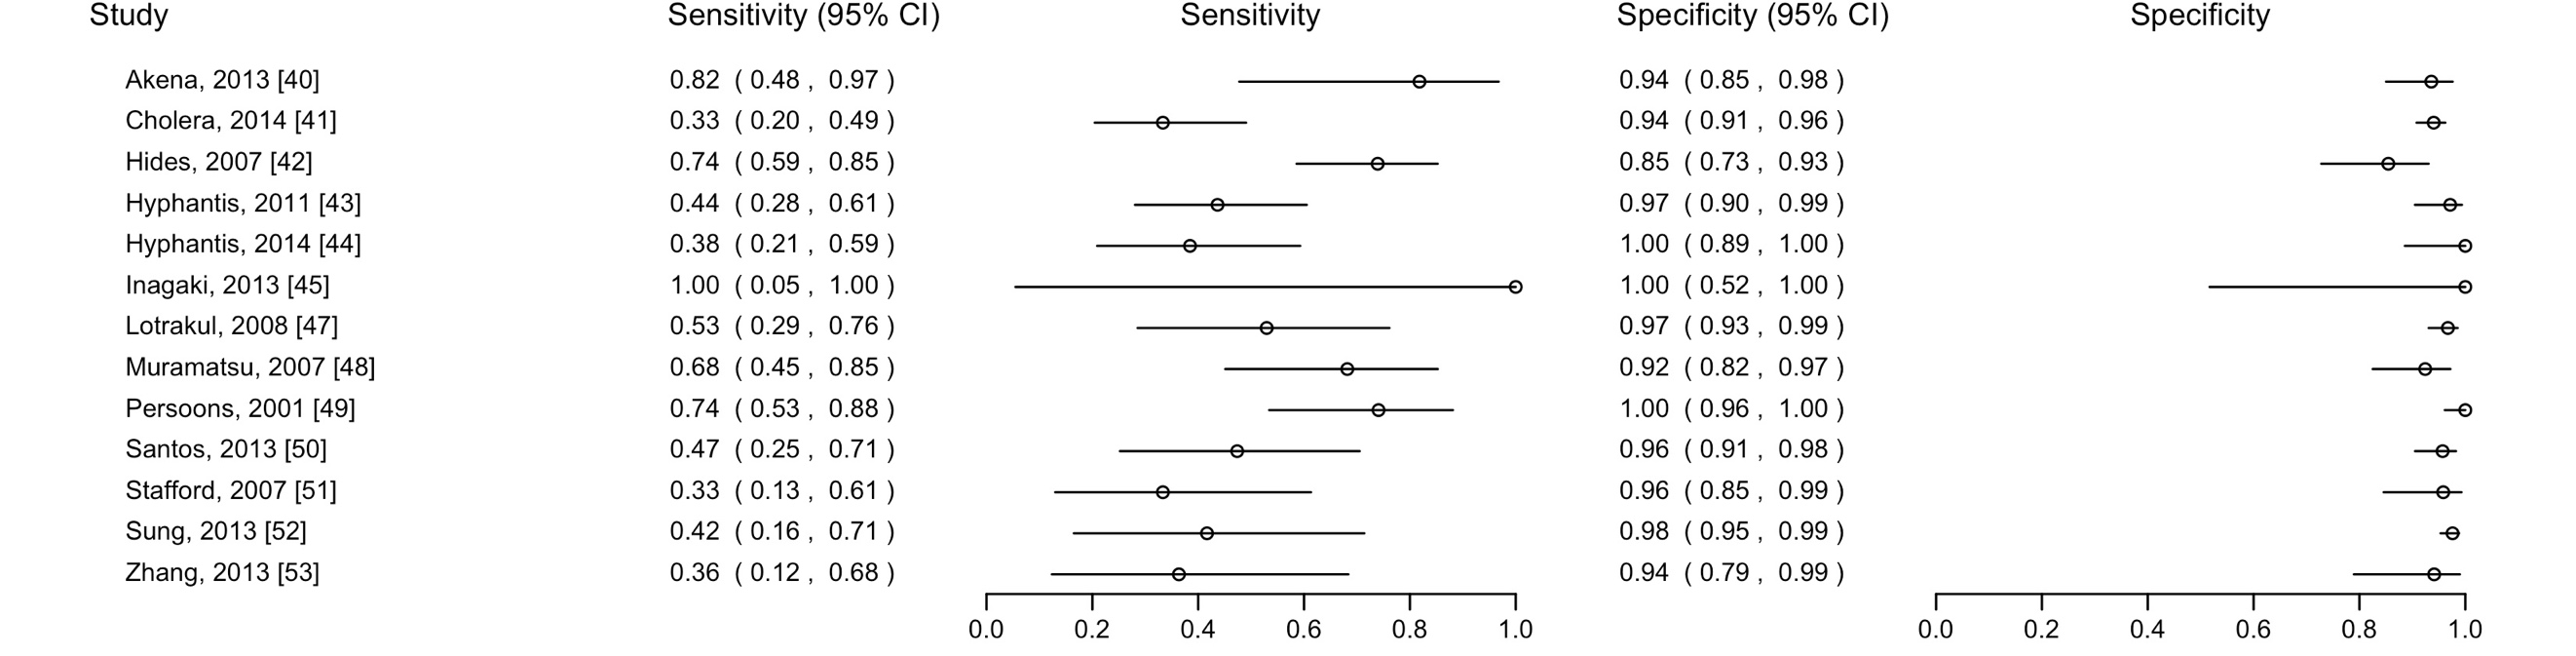


**Supplementary Figure 2y.** Forest plots of sensitivity and specificity estimates for the original diagnostic PHQ-9 algorithm among participants aged ≥60, among studies that used the MINI as the reference standard (N studies = 12; N participants = 880; N major depression = 226)


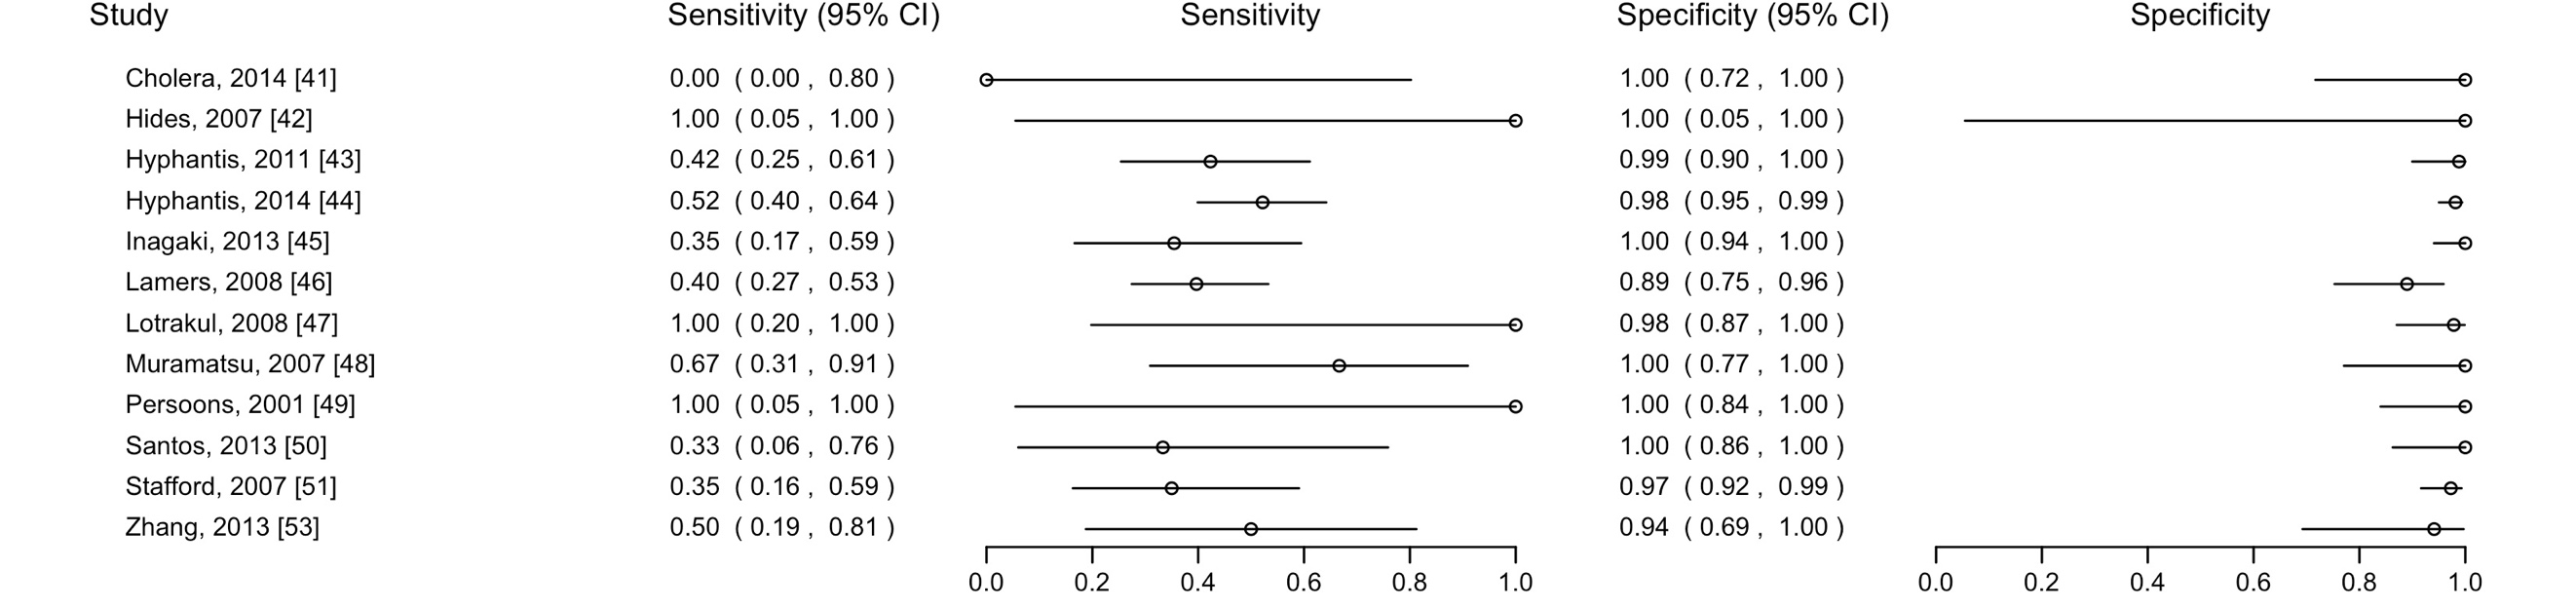


**Supplementary Figure 2z.** Forest plots of sensitivity and specificity estimates the original diagnostic PHQ-9 algorithm among women, among studies that used the MINI as the reference standard (N studies = 14; N participants = 1,580; N major depression = 325)

**
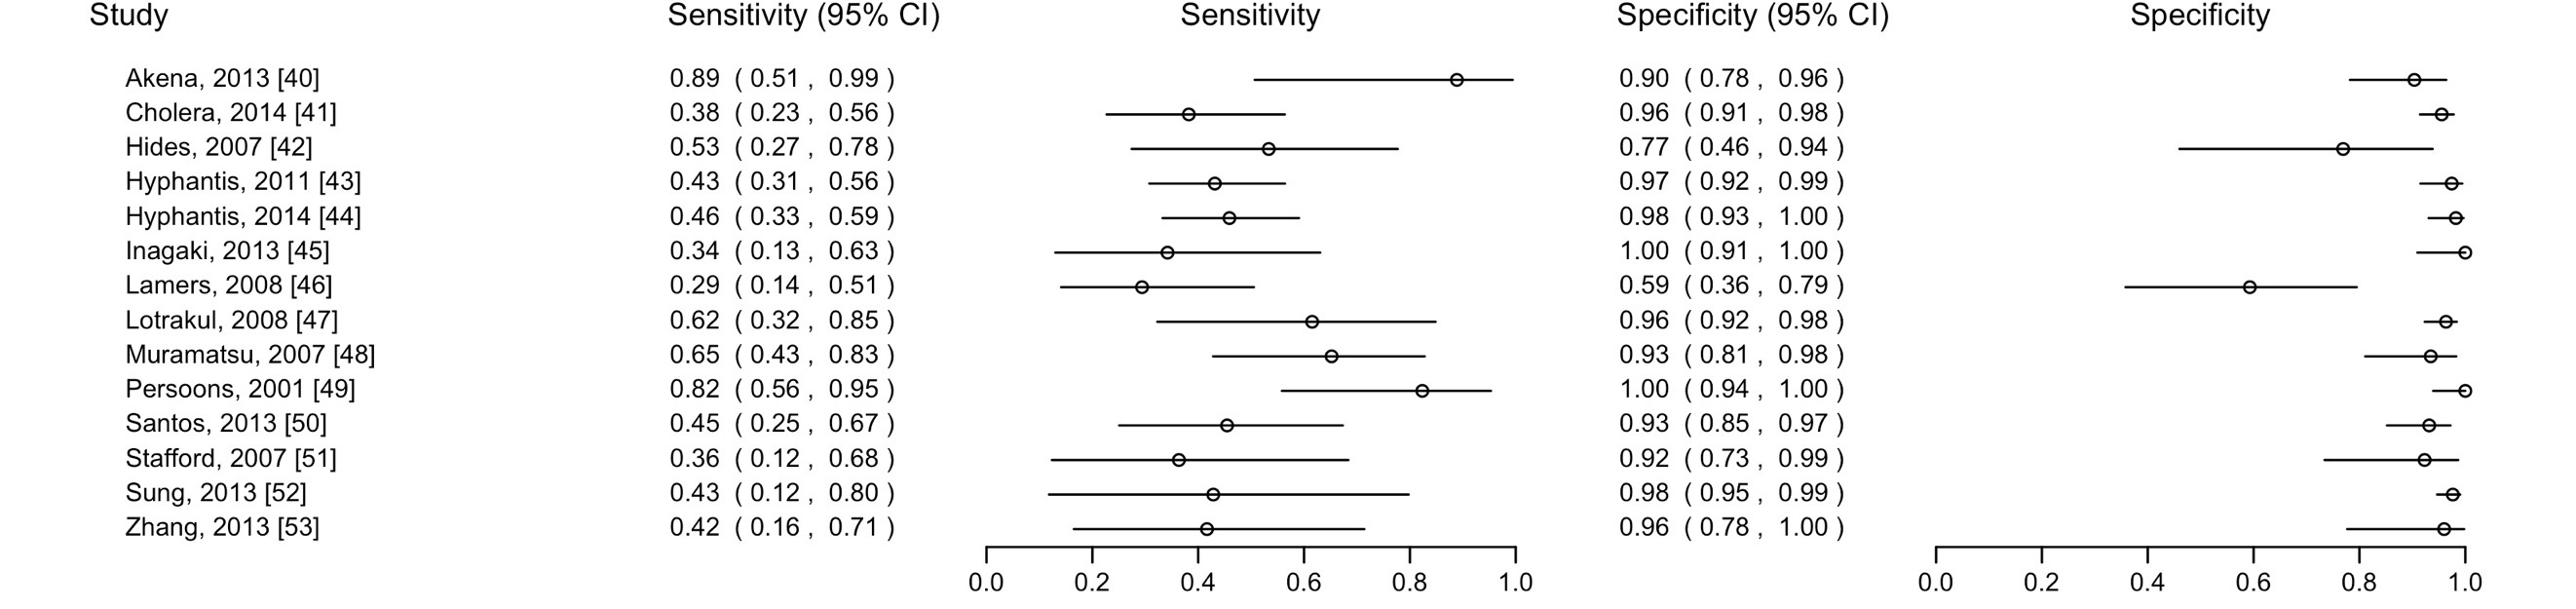
**

**Supplementary Figure 2aa.** Forest plots of sensitivity and specificity estimates for the original diagnostic PHQ-9 algorithm among men, among studies that used the MINI as the reference standard (N studies = 14; N participants = 1,200; N major depression = 191)

**
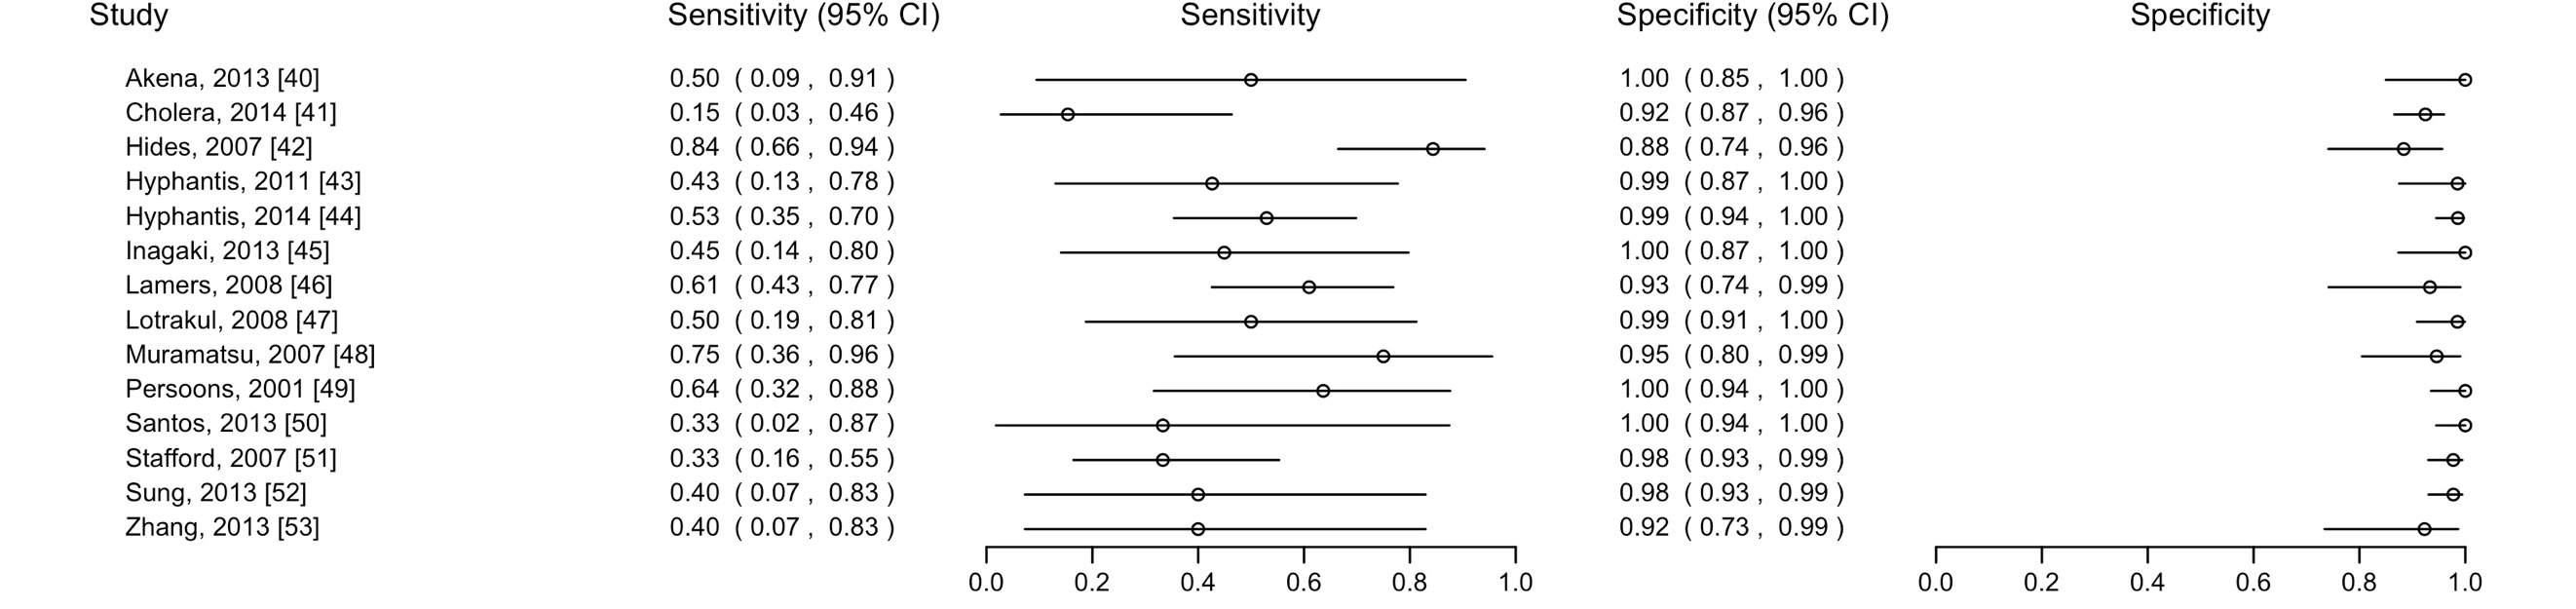
**

**Supplementary Figure 2ab.** Forest plots of sensitivity and specificity estimates for the original diagnostic PHQ-9 algorithm among participants from a country with a very high human development index, among studies that used the MINI as the reference standard (N studies = 9; N participants = 1,752; N major depression = 397)

**
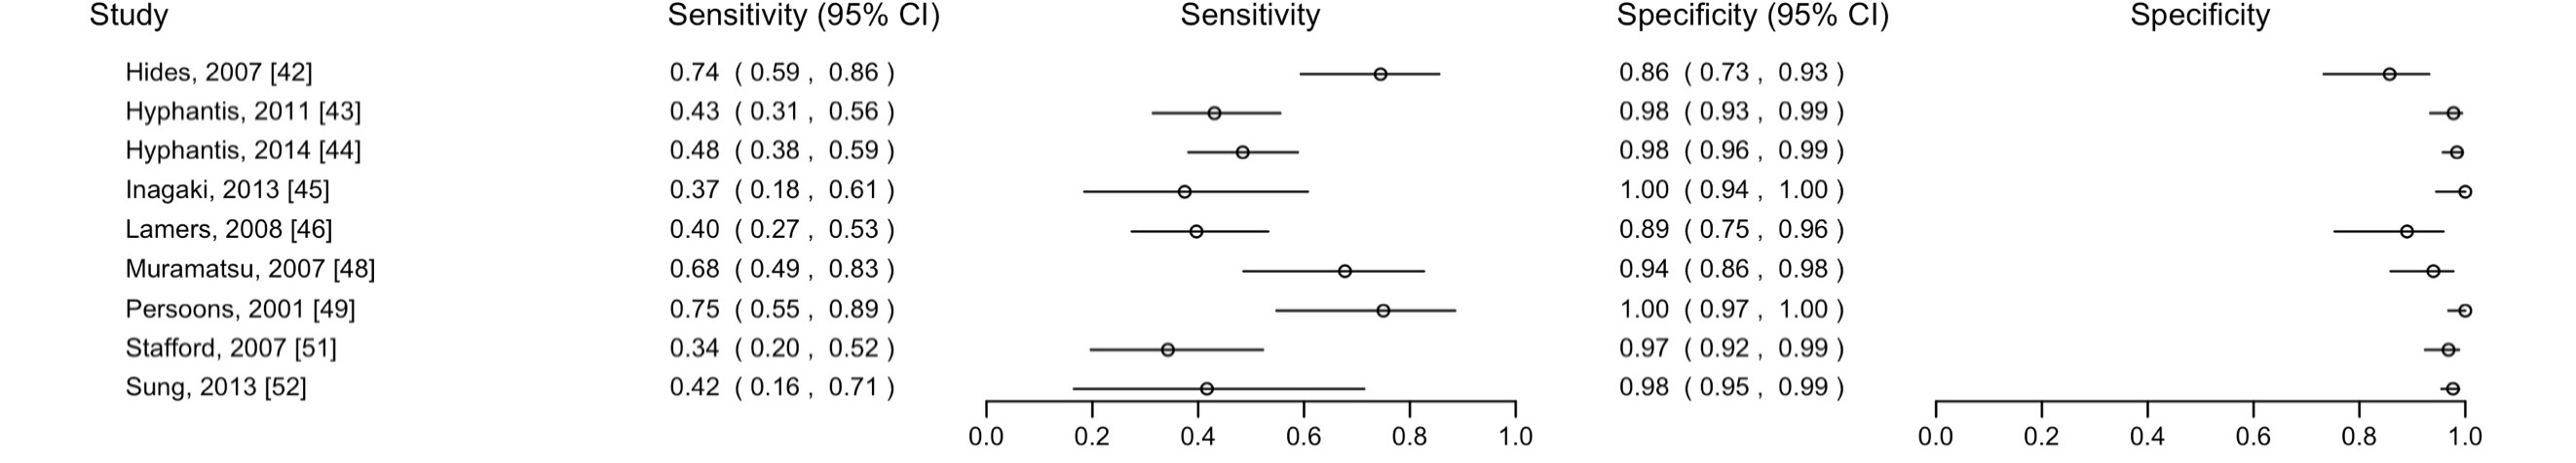
**

**Supplementary Figure 2ac.** Forest plots of sensitivity and specificity estimates for the original diagnostic PHQ-9 algorithm among participants from a country with a low, medium or high-country human development index, among studies that used the MINI as the reference standard (N studies = 5; N participants = 1,028; N major depression = 119)

**
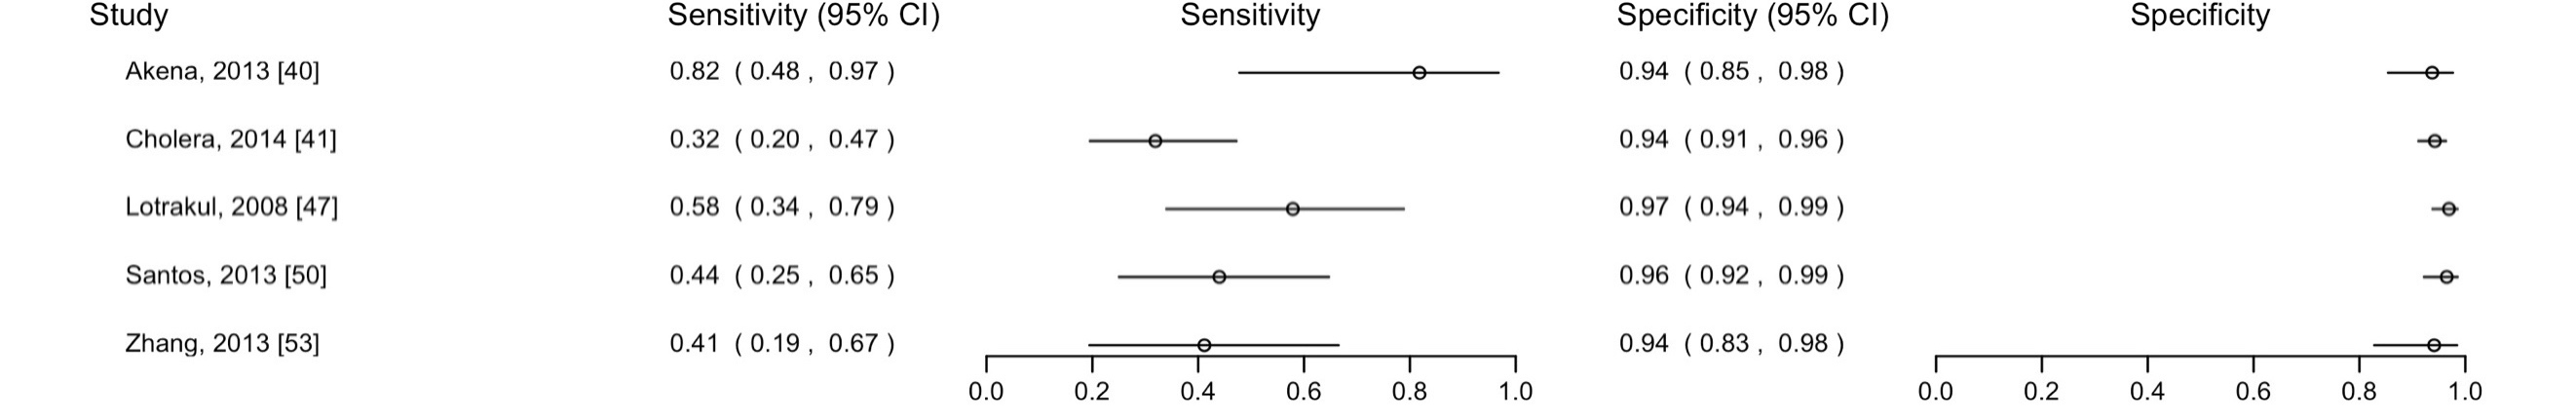
**

**Supplementary Figure 2ad.** Forest plots of sensitivity and specificity estimates for the original diagnostic PHQ-9 algorithm among participants from a non-medical setting, among studies that used the MINI as the reference standard (N studies = 2; N participants = 299; N major depression = 72)

**
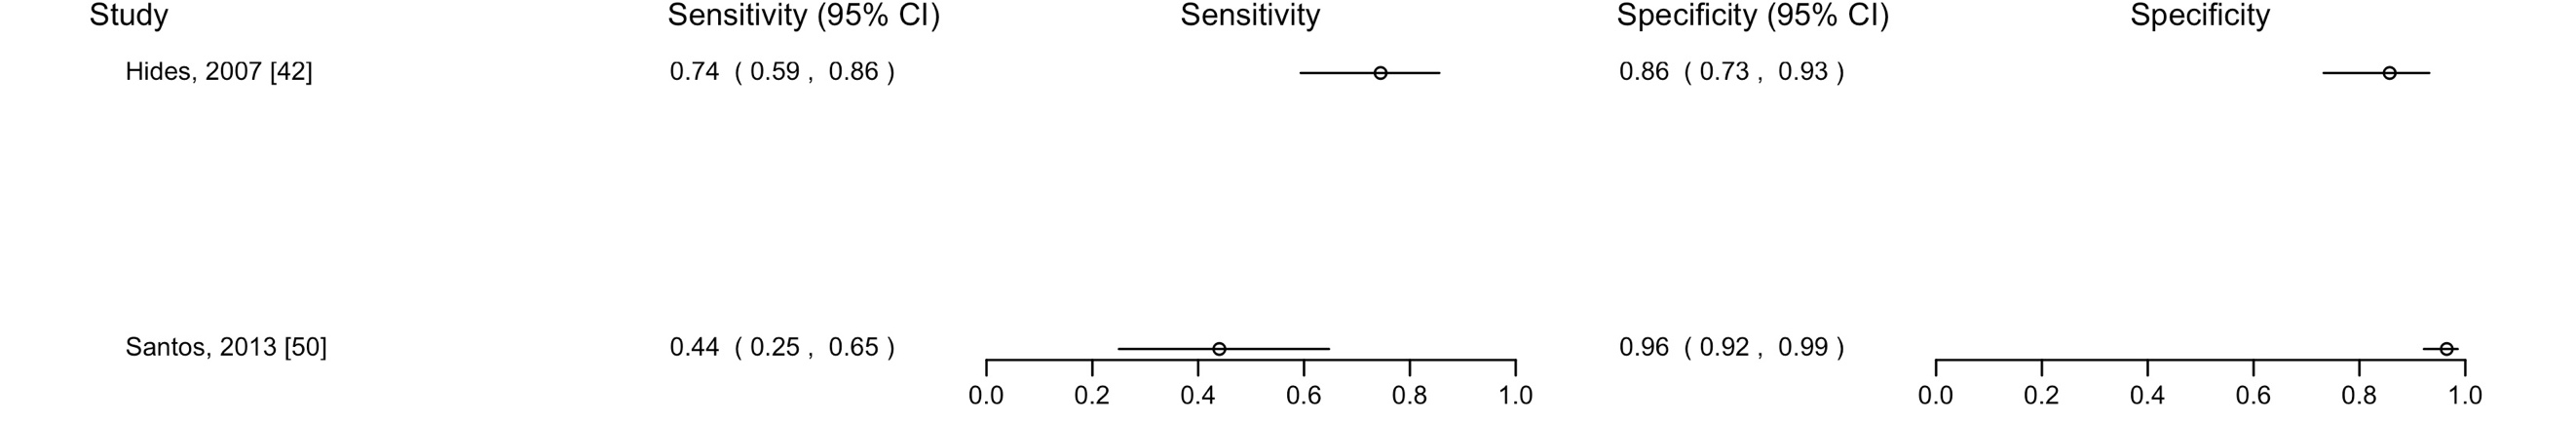
**

**Supplementary Figure 2ae.** Forest plots of sensitivity and specificity estimates for the original diagnostic PHQ-9 algorithm among participants from a primary care setting, among studies that used the MINI as the reference standard (N studies = 5; N participants = 1,290; N major depression = 168)

**
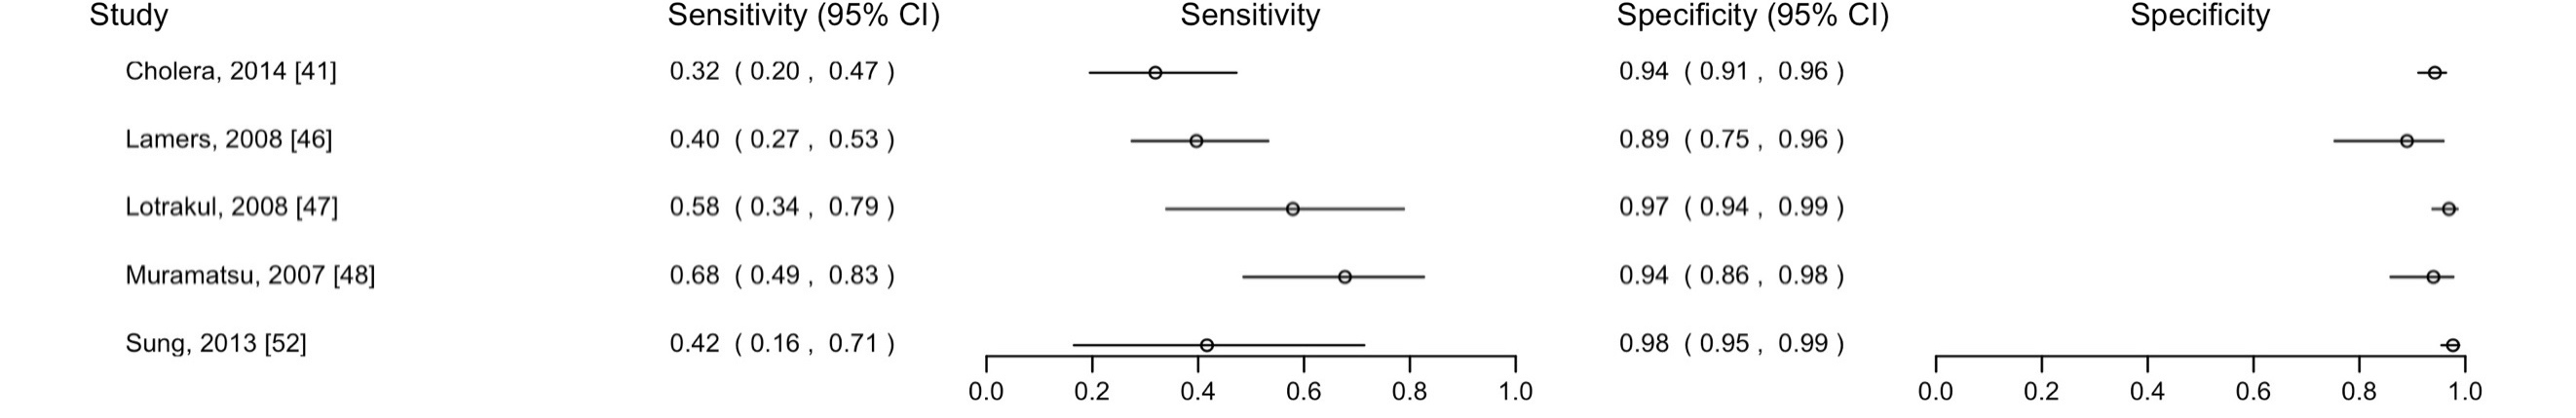
**

**Supplementary Figure 2af.** Forest plots of sensitivity and specificity estimates for the original diagnostic PHQ-9 algorithm among participants from a specialty care setting, among studies that used the MINI as the reference standard (N studies = 8; N participants = 1,191; N major depression = 276)

**
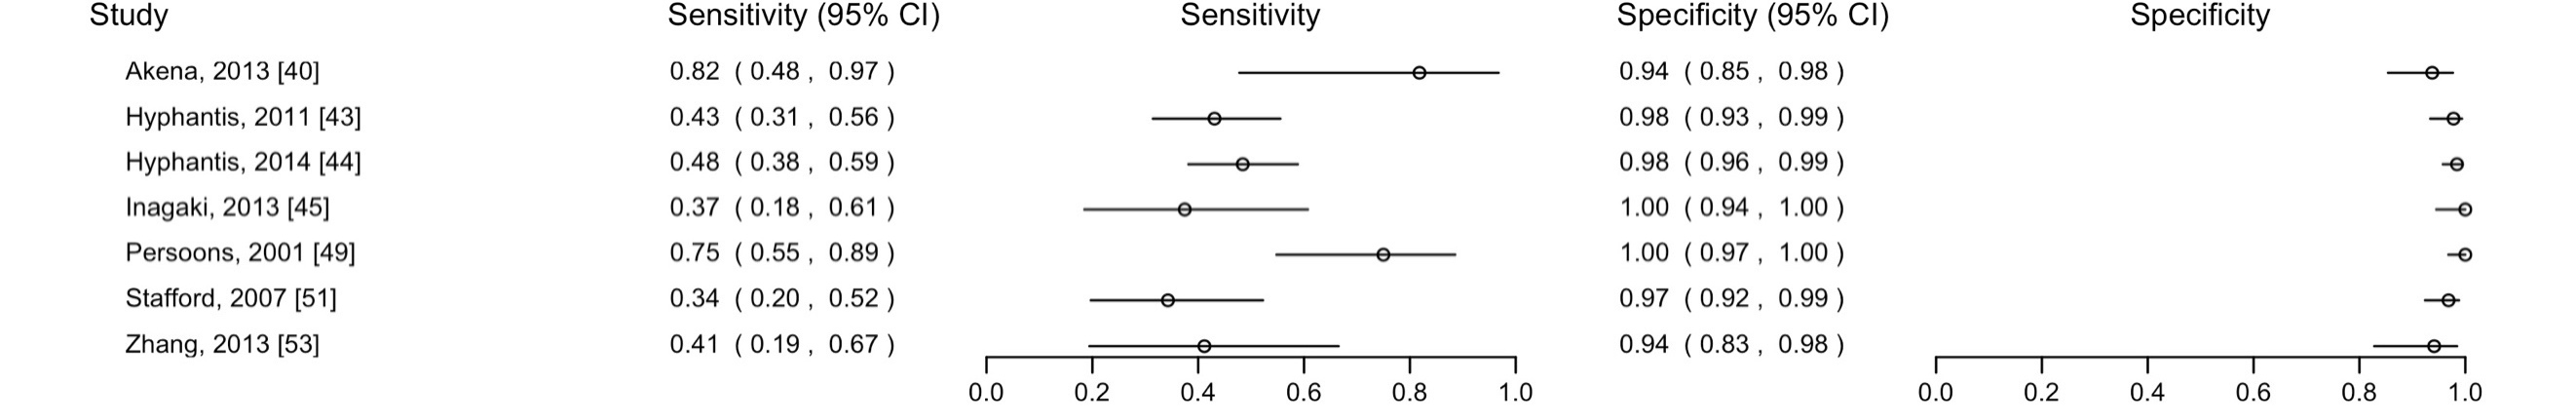
**

**Supplementary Figure 3a.** Forest plots of sensitivity and specificity estimates for the modified diagnostic PHQ-9 algorithm, among studies that used a semi-structured diagnostic interview as the reference standard (N studies = 27; N participants = 6,331; N major depression = 787)


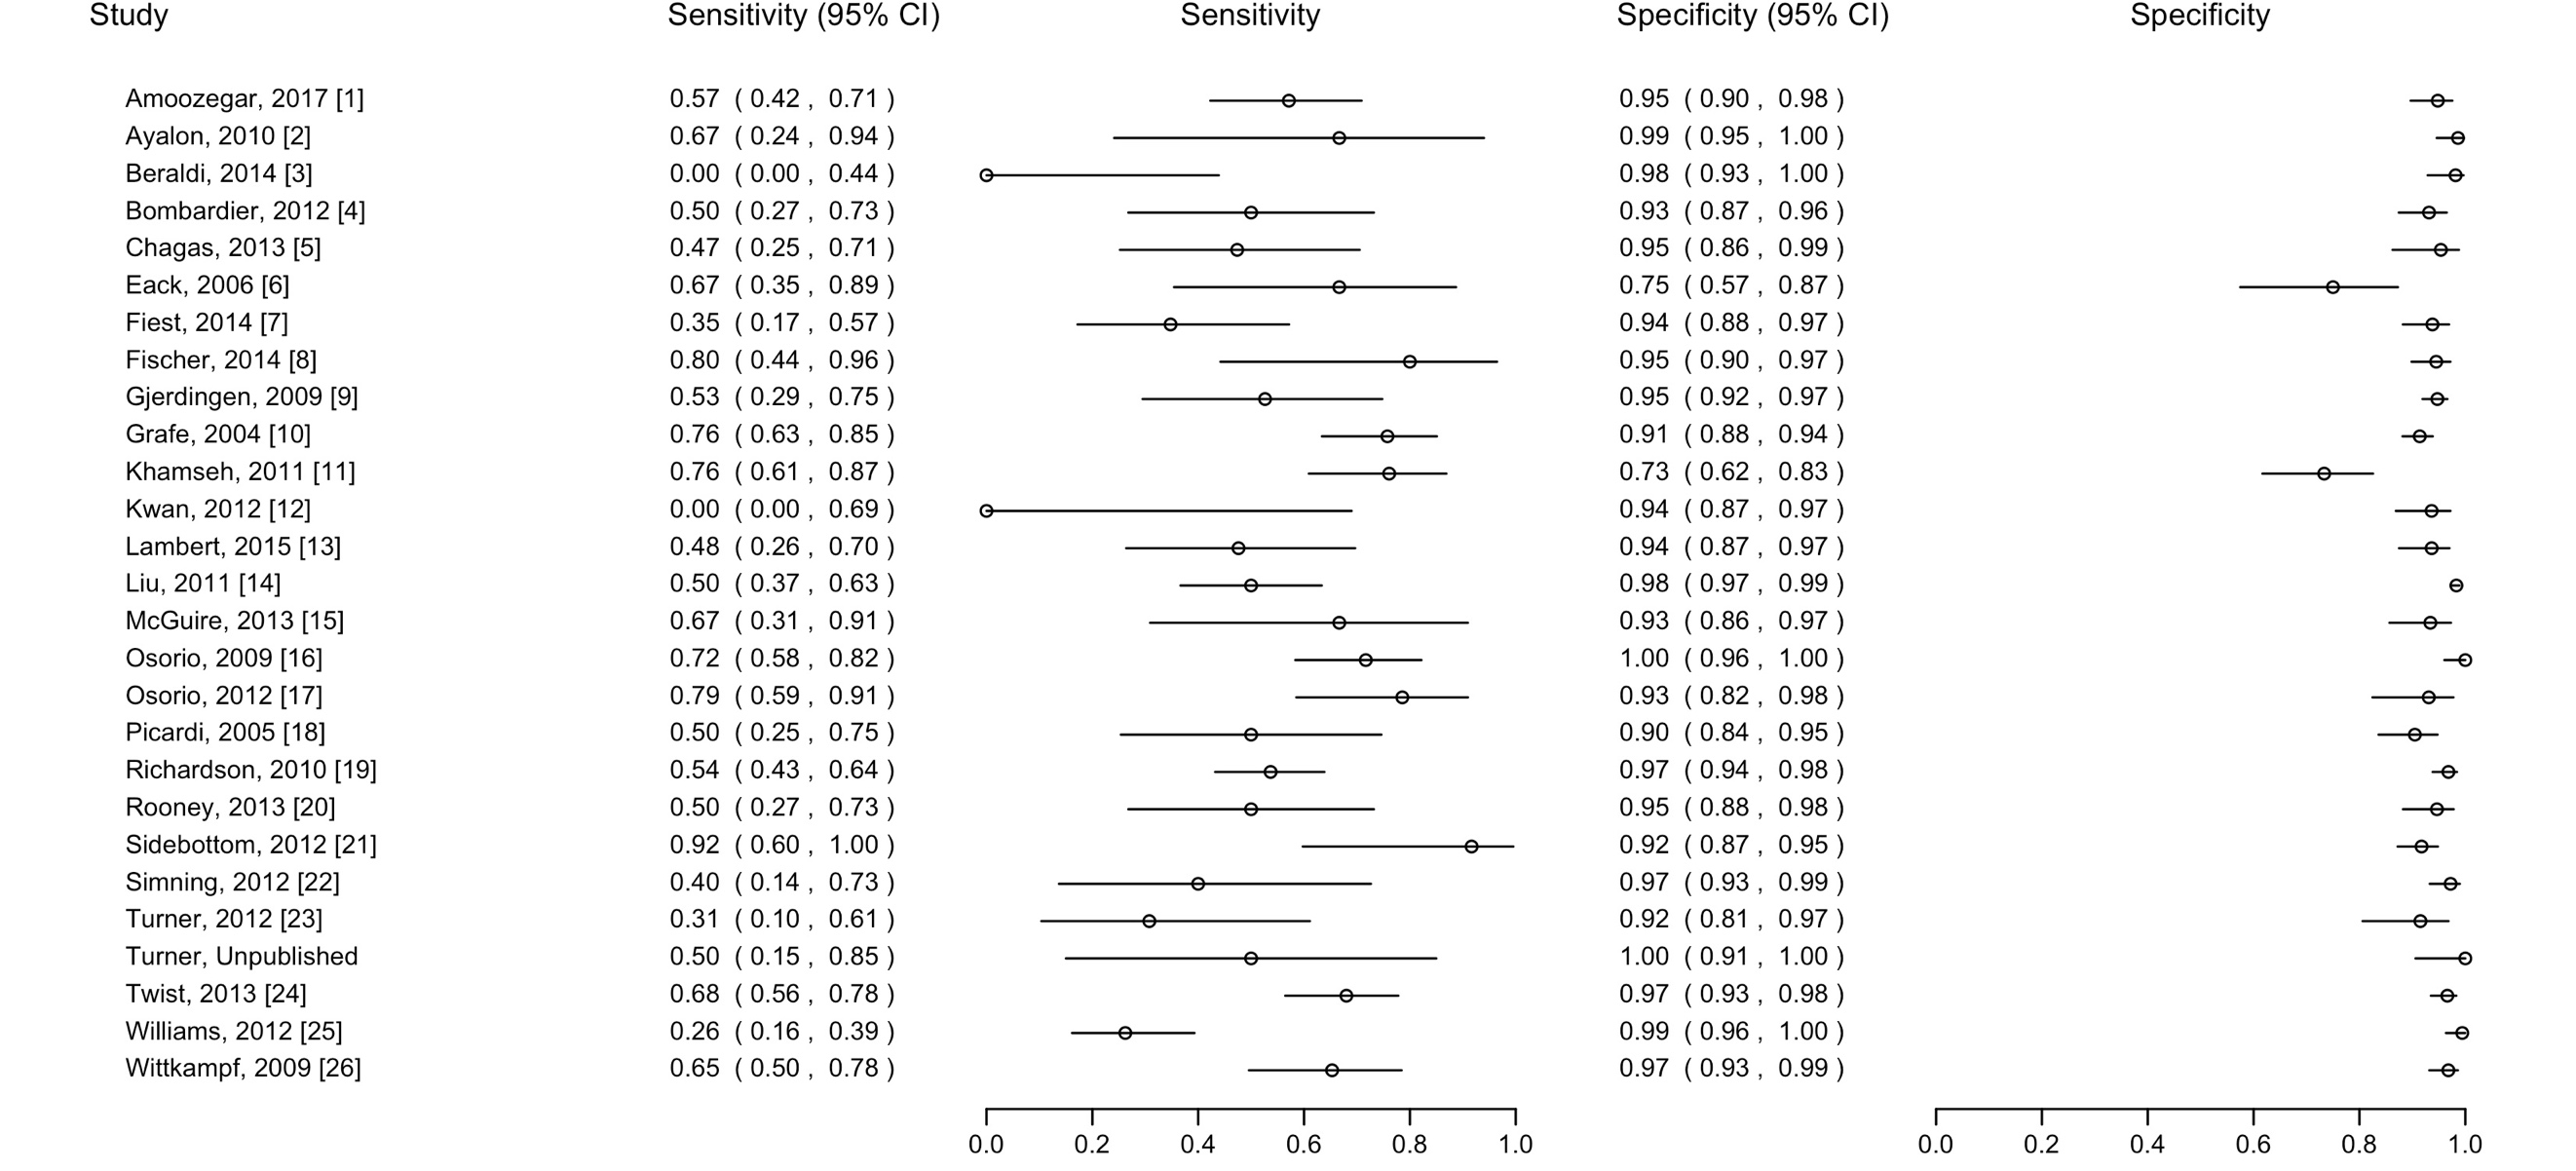


**Supplementary Figure 3b.** Forest plots of sensitivity and specificity estimates for the modified diagnostic PHQ-9 algorithm among participants aged <60, among studies that used a semi-structured diagnostic interview as the reference standard (N studies = 24; N participants = 3,844; N major depression = 516)

**
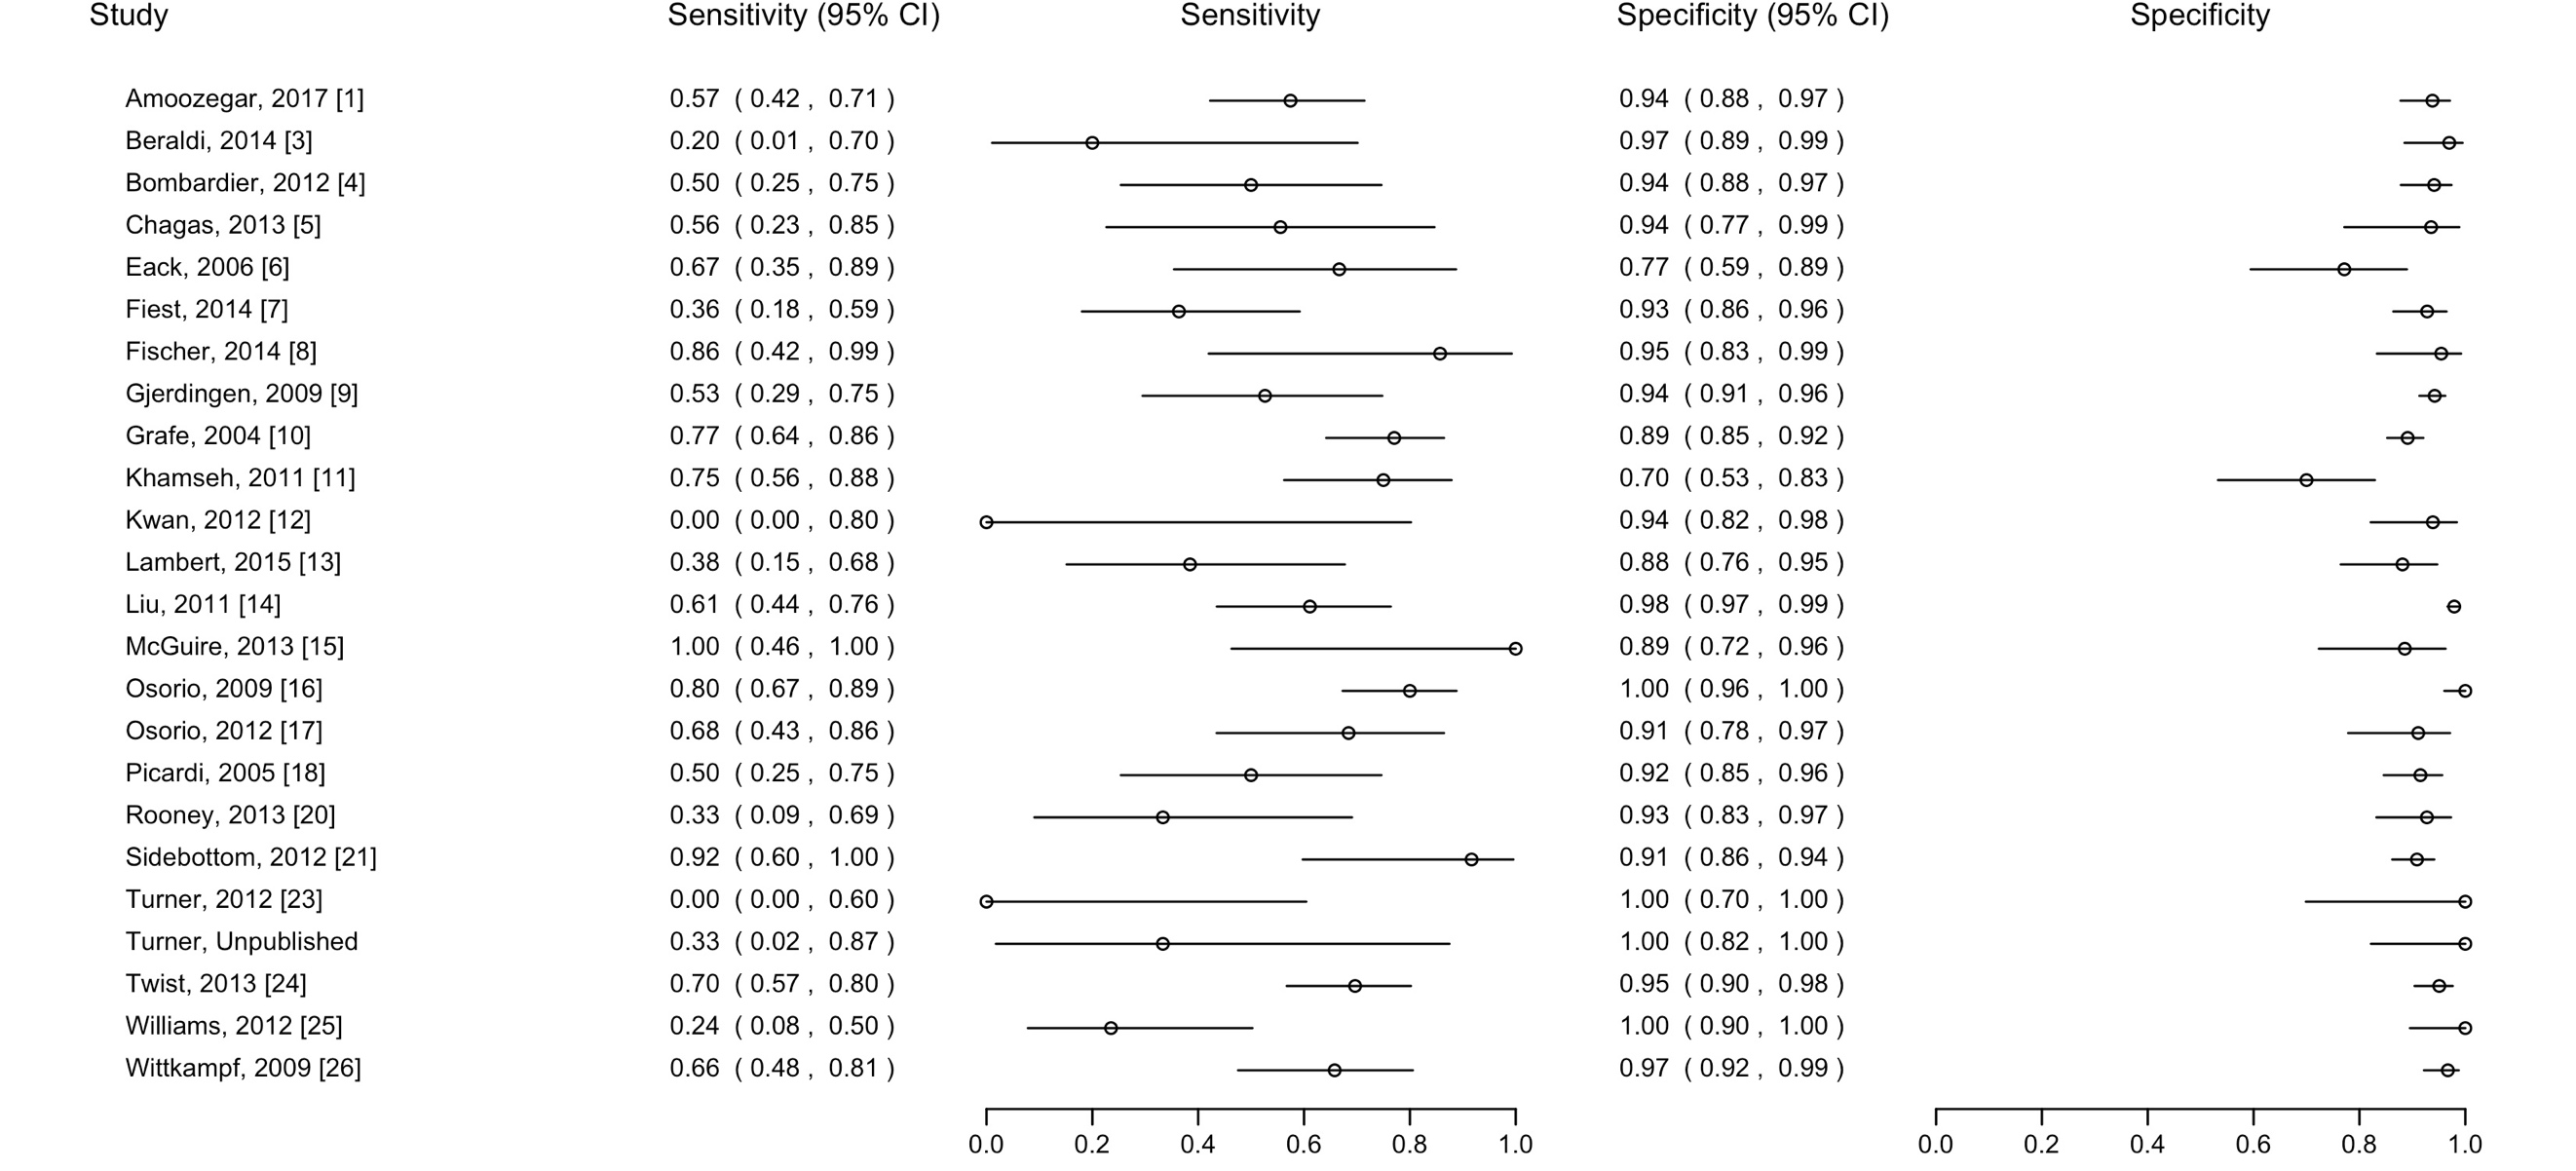
**

**Supplementary Figure 3c.** Forest plots of sensitivity and specificity estimates for the modified diagnostic PHQ-9 algorithm among participants aged ≥60, among studies that used a semi-structured diagnostic interview as the reference standard (N studies = 24; N participants = 2,480; N major depression = 271)

**
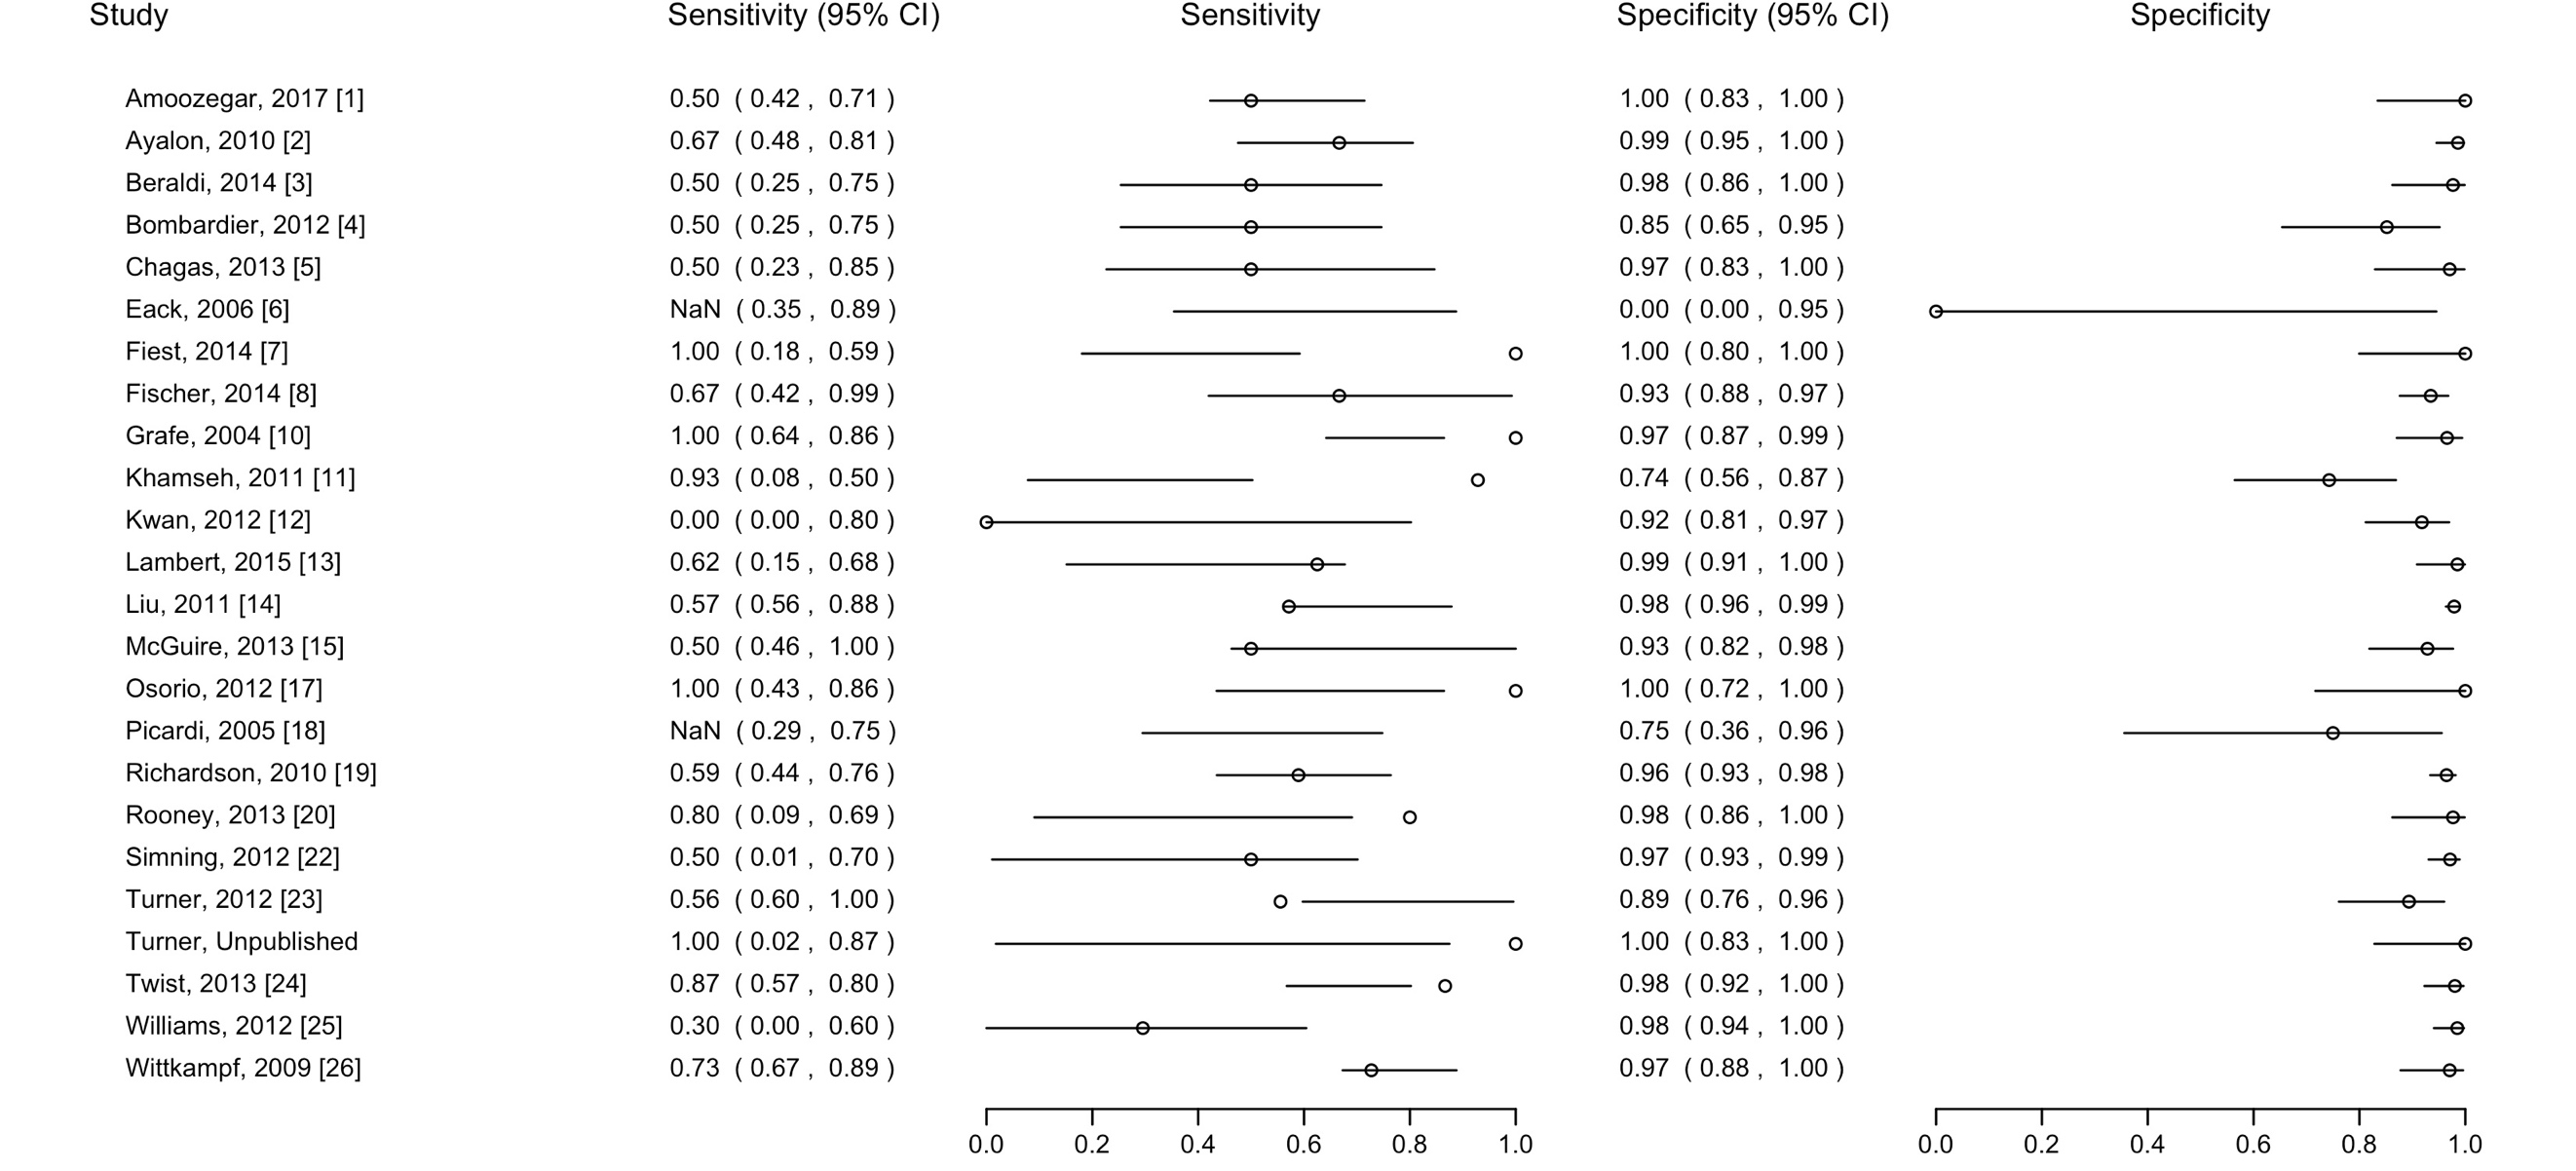
**

**Supplementary Figure 3d.** Forest plots of sensitivity and specificity estimates for the modified diagnostic PHQ-9 algorithm among women, among studies that used a semi-structured diagnostic interview as the reference standard (N studies = 26; N participants = 3,671; N major depression = 477)

**
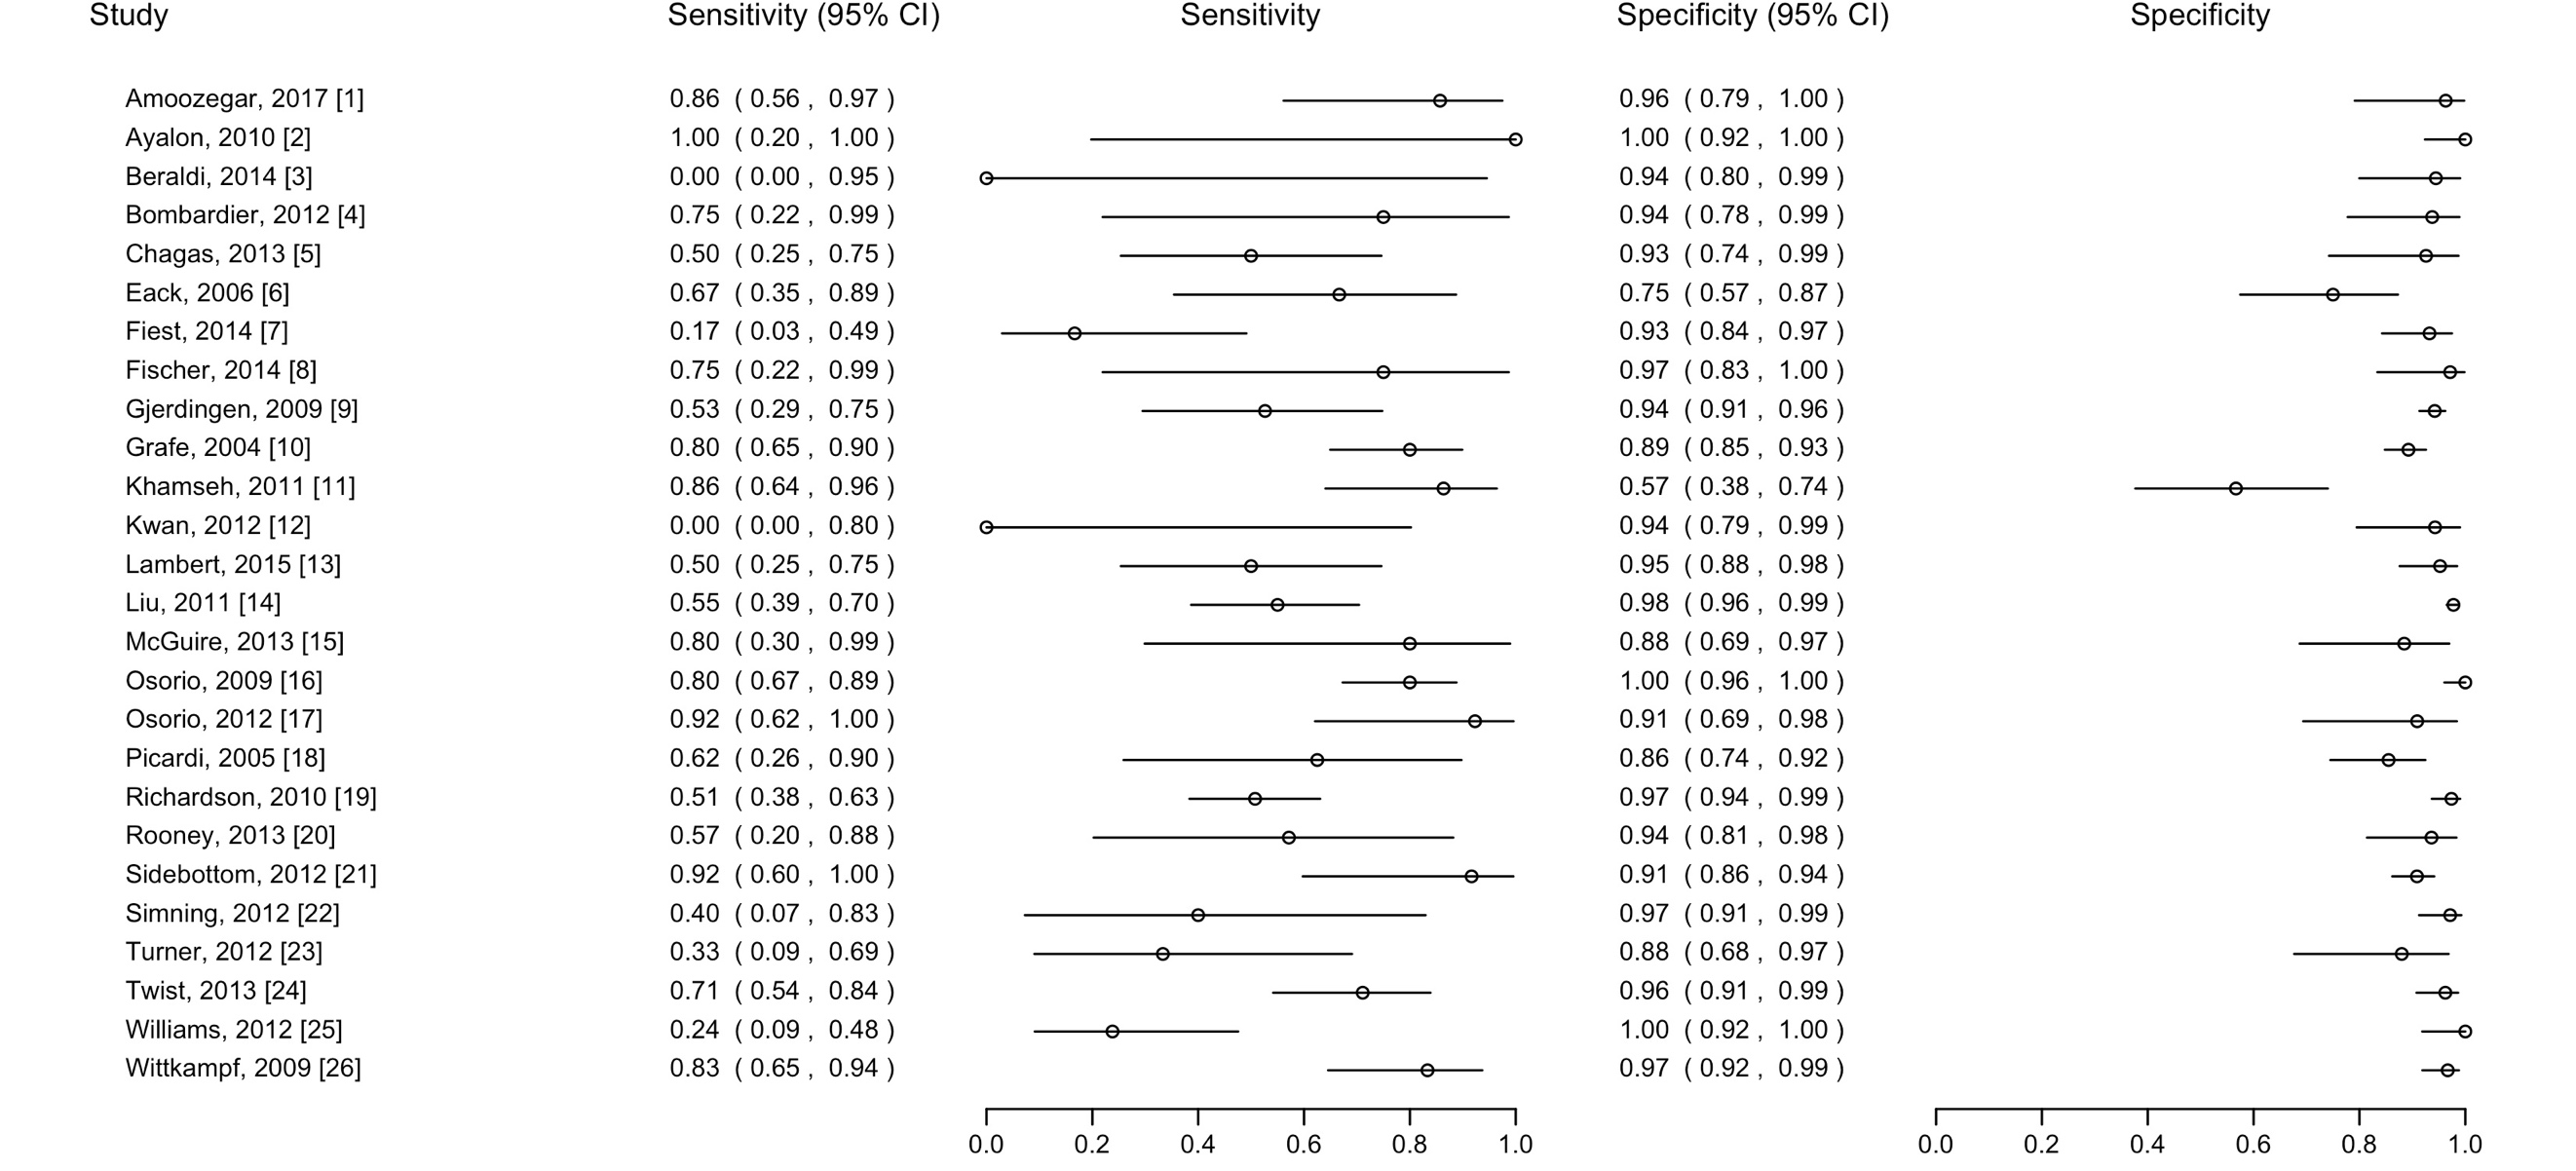
**

**Supplementary Figure 3e.** Forest plots of sensitivity and specificity estimates for the modified diagnostic PHQ-9 algorithm among men, among studies that used a semi-structured diagnostic interview as the reference standard (N studies = 23; N participants = 2,653; N major depression = 310)

**
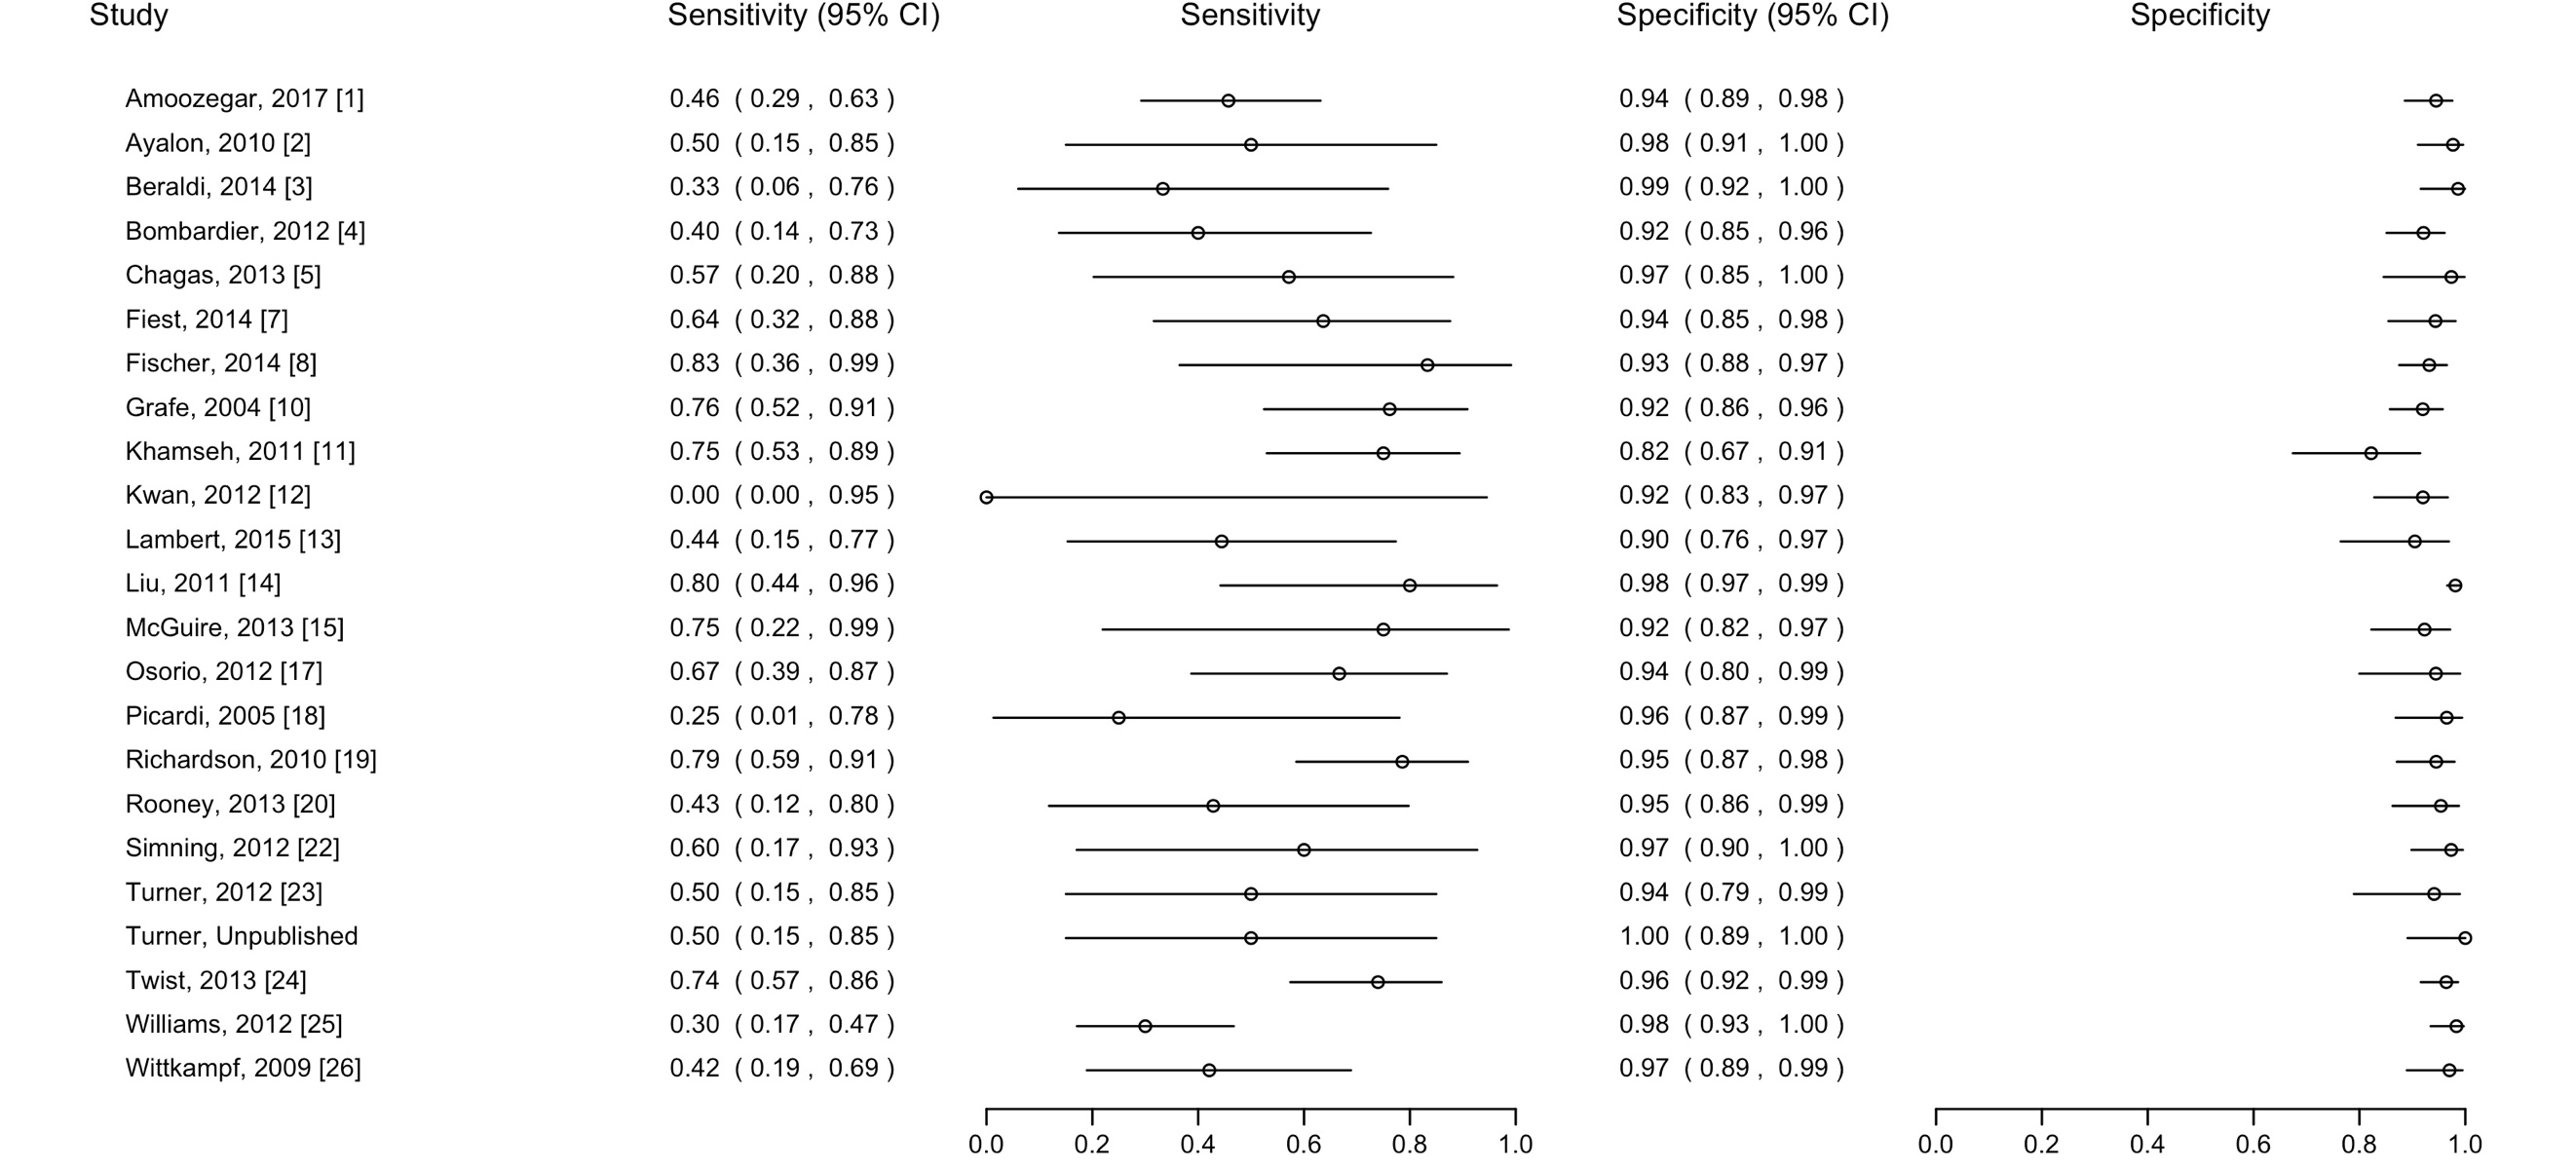
**

**Supplementary Figure 3f.** Forest plots of sensitivity and specificity estimates for the modified diagnostic PHQ-9 algorithm among participants from a country with a very high human development index, among studies that used a semi-structured diagnostic interview as the reference standard (N studies = 23; N participants = 5,863; N major depression = 634)

**
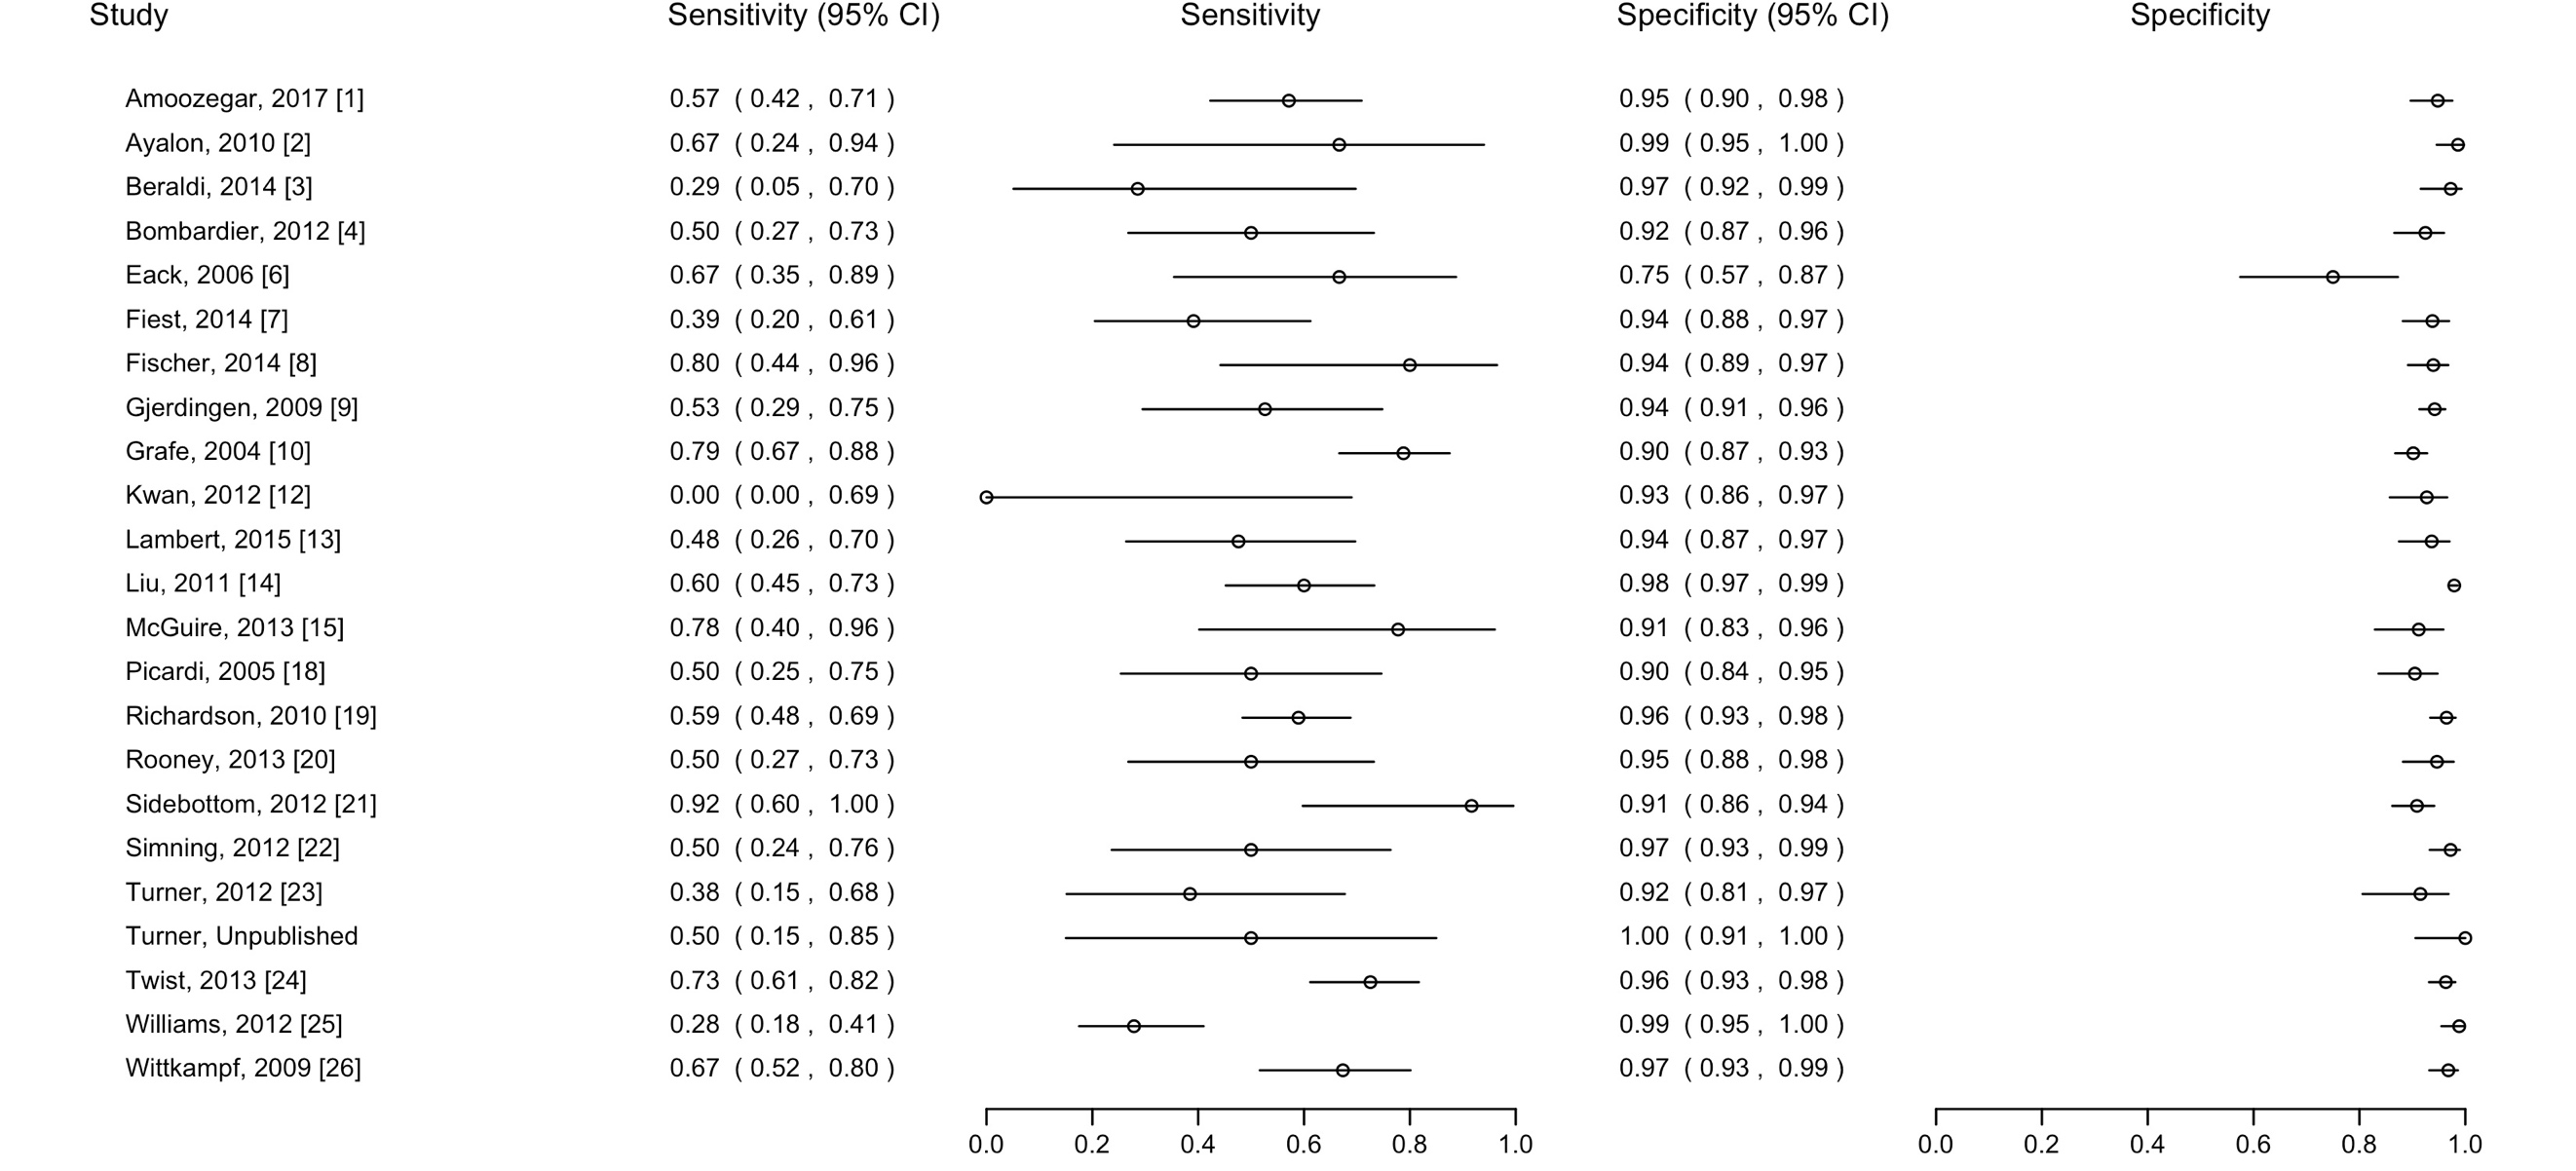
**

**Supplementary Figure 3g.** Forest plots of sensitivity and specificity estimates for the modified diagnostic PHQ-9 algorithm among participants from a country with a low, medium or high-country human development index, among studies that used a semi-structured diagnostic interview as the reference standard (N studies = 4; N participants = 468; N major depression = 153)

**
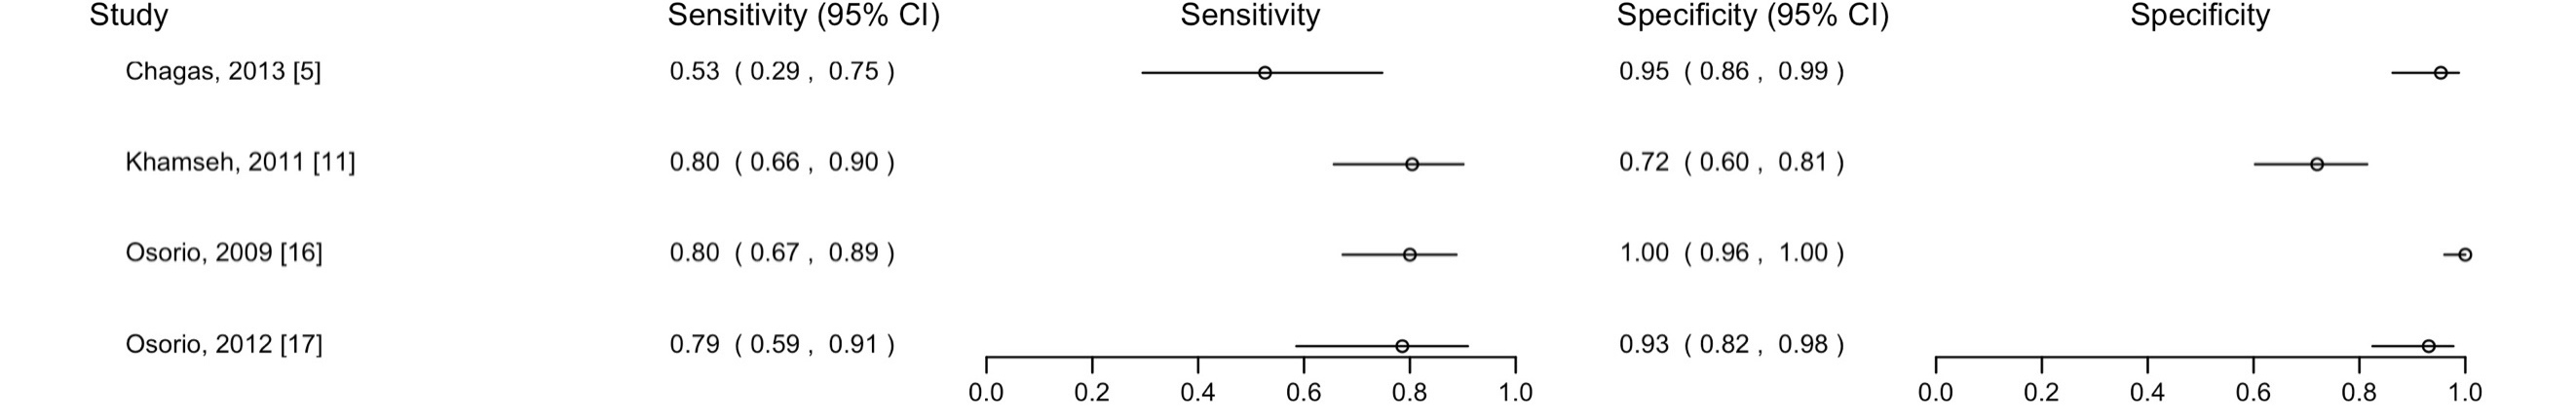
**

**Supplementary Figure 3h.** Forest plots of sensitivity and specificity estimates for the modified diagnostic PHQ-9 algorithm among participants from a non-medical setting, among studies that used a semi-structured diagnostic interview as the reference standard (N studies = 2; N participants = 567; N major depression = 105)

**
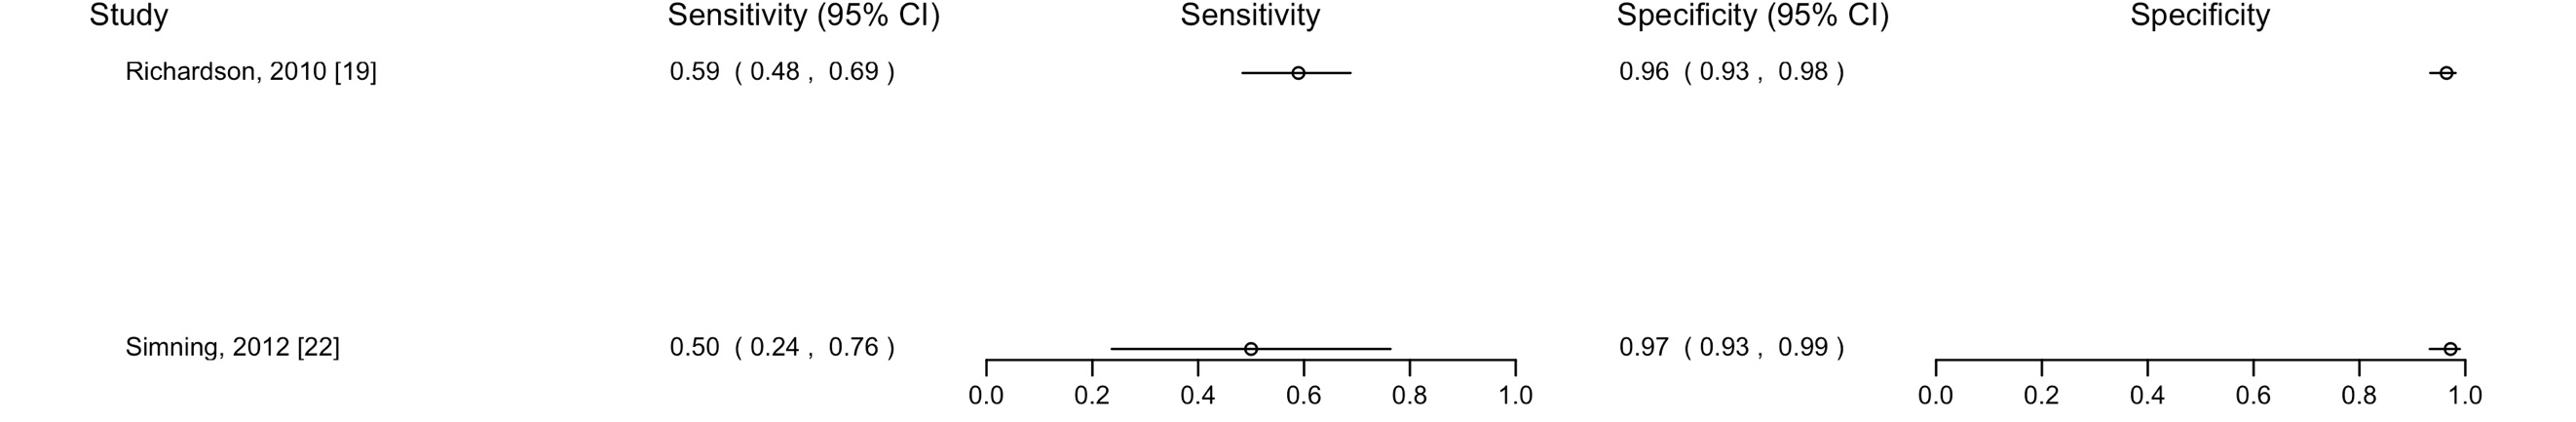
**

**Supplementary Figure 3i.** Forest plots of sensitivity and specificity estimates for the modified diagnostic PHQ-9 algorithm among participants from a primary care setting, among studies that used a semi-structured diagnostic interview as the reference standard (N studies = 8; N participants = 2,965; N major depression = 317)

**
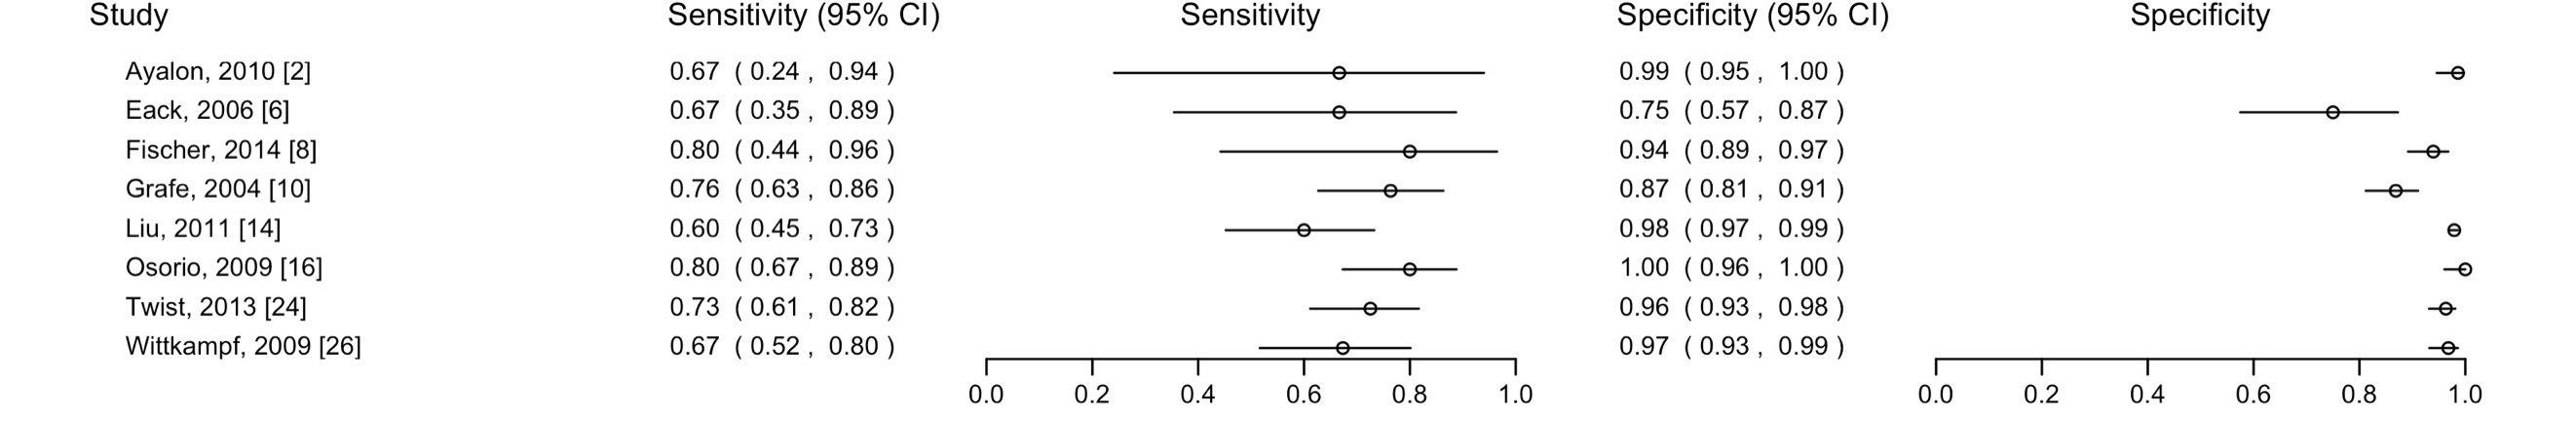
**

**Supplementary Figure 3j.** Forest plots of sensitivity and specificity estimates for the modified diagnostic PHQ-9 algorithm among participants from an inpatient specialty care setting, among studies that used a semi-structured diagnostic interview as the reference standard (N studies = 7; N participants = 733; N major depression = 76)


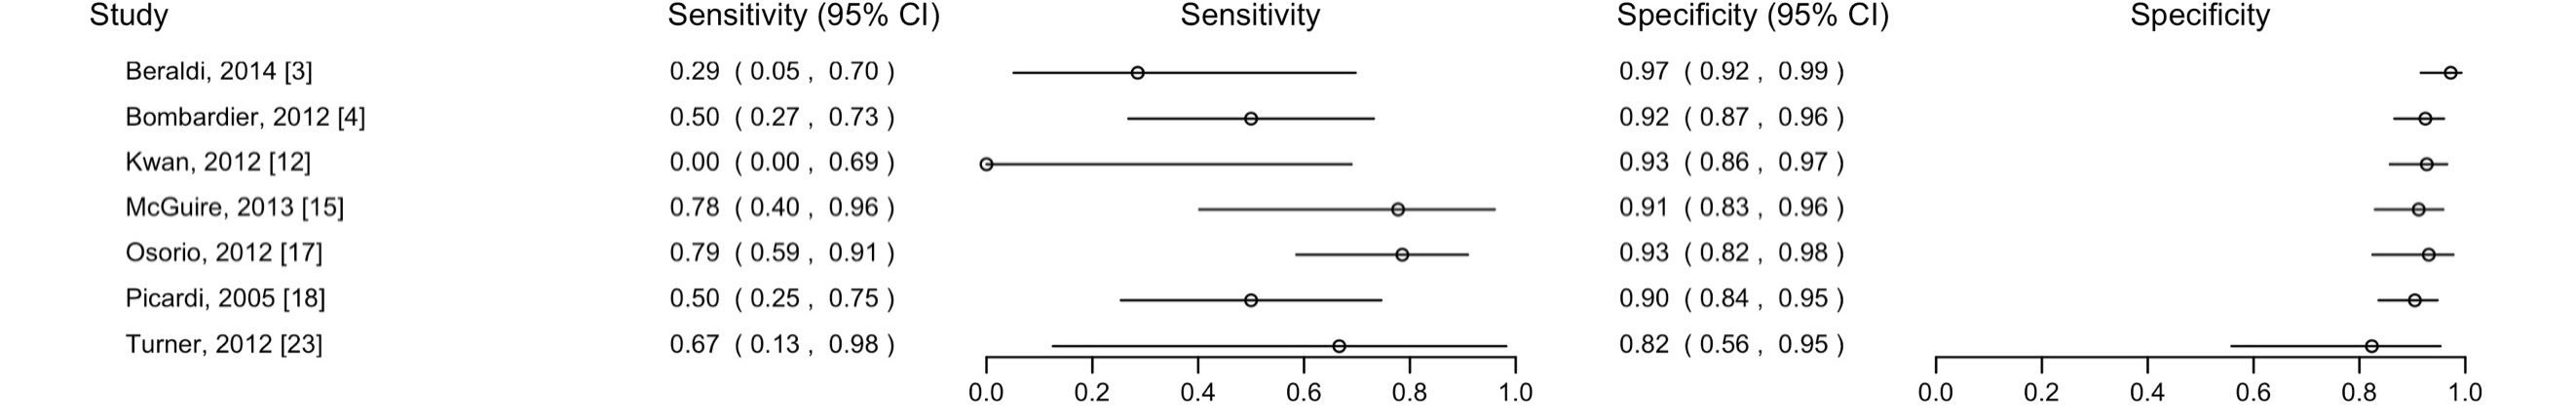


**Supplementary Figure 3k.** Forest plots of sensitivity and specificity estimates the modified diagnostic PHQ-9 algorithm among participants from an outpatient specialty care setting, among studies that used a semi-structured diagnostic interview as the reference standard (N studies = 12; N participants = 2,066; N major depression = 289)

**
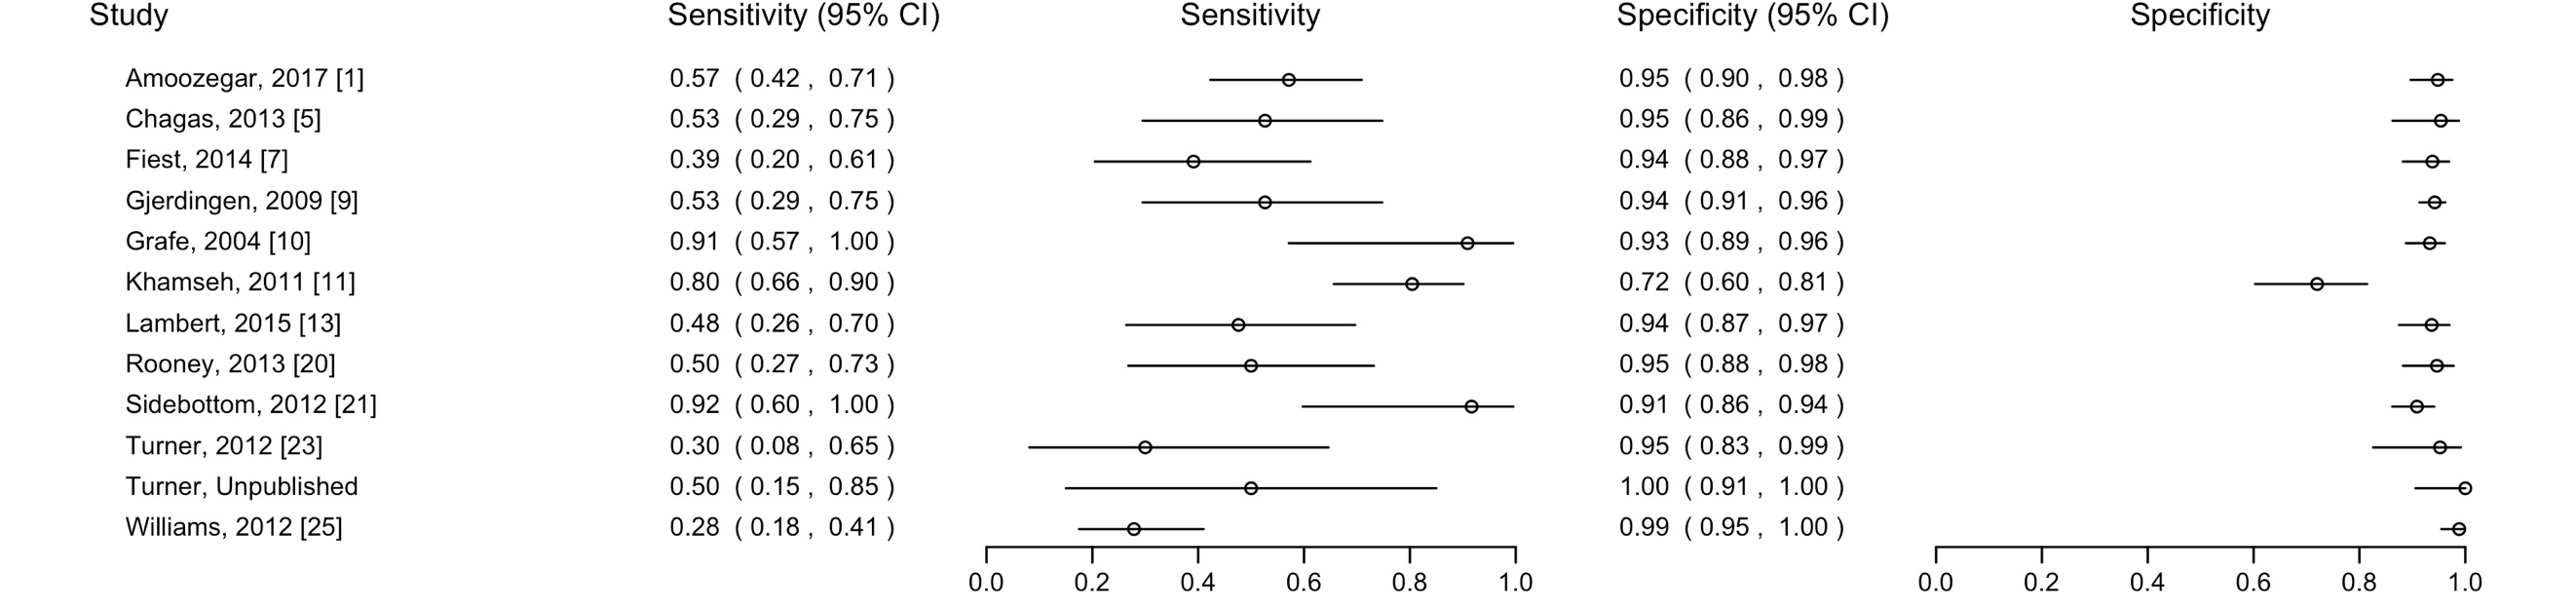
**

**Supplementary Figure 3l.** Forest plots of sensitivity and specificity estimates for the modified diagnostic PHQ-9 algorithm, among studies that used a fully structured diagnostic interview as the reference standard (N studies = 13; N participants = 7,577; N major depression = 788)


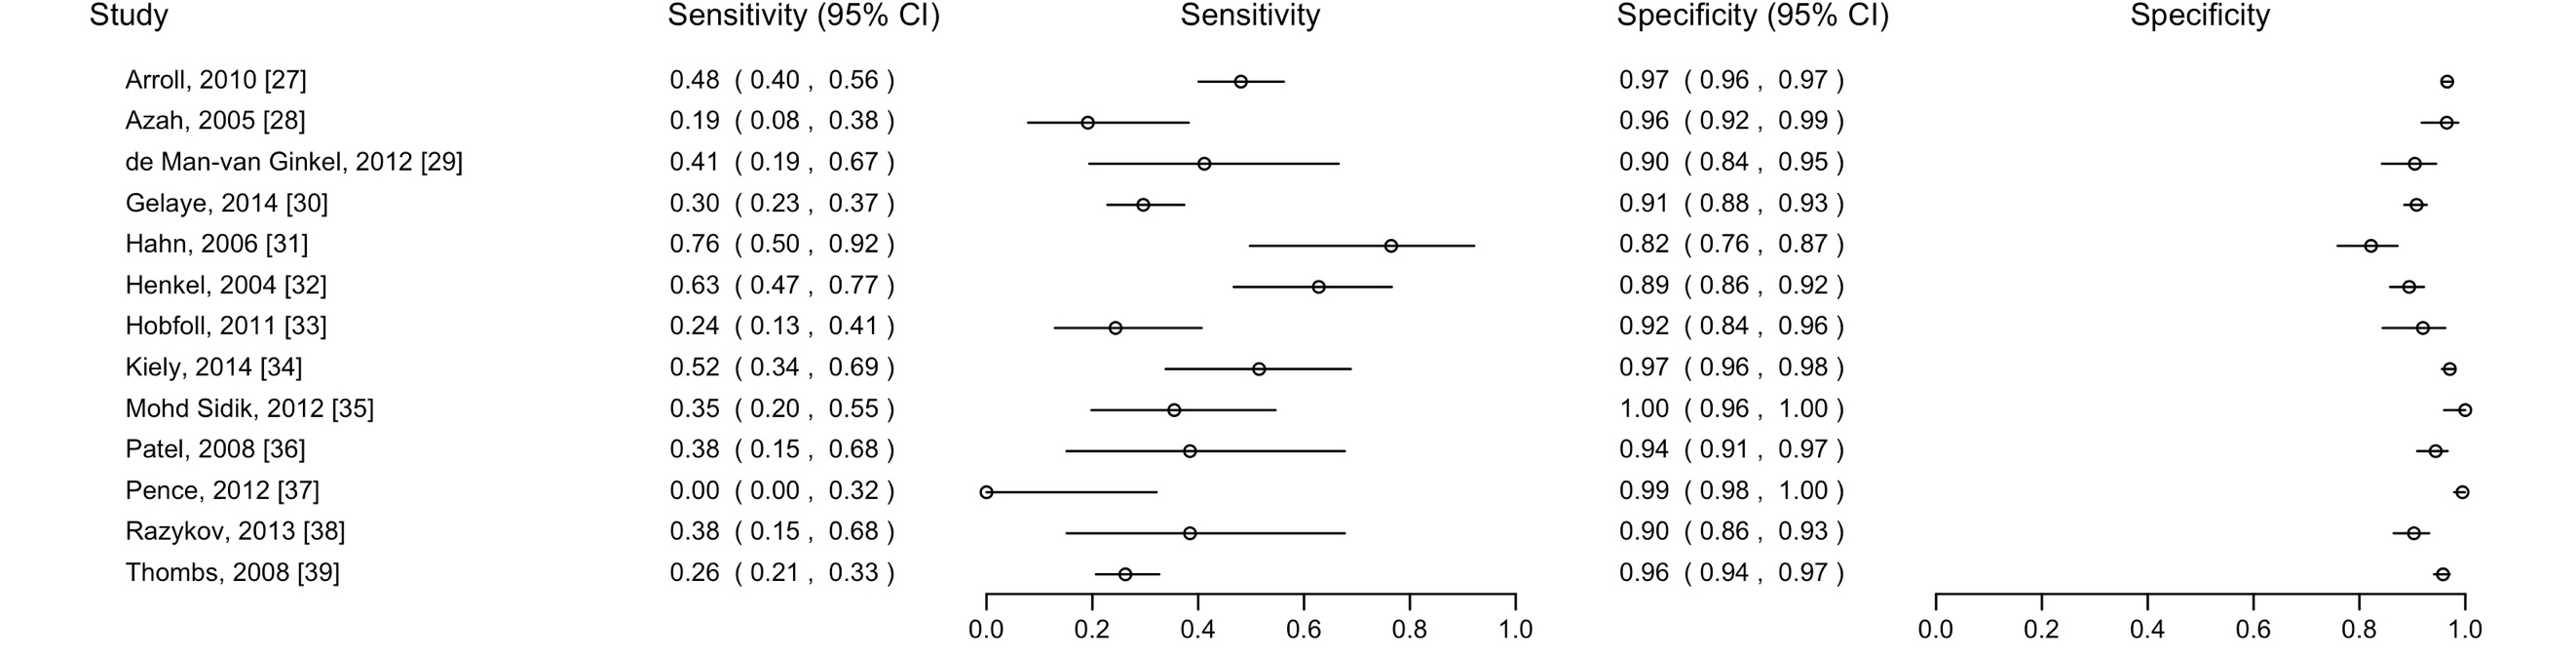


**Supplementary Figure 3m.** Forest plots of sensitivity and specificity estimates for the modified diagnostic PHQ-9 algorithm among participants aged <60, among studies that used a fully structured diagnostic interview as the reference standard (N studies = 13; N participants = 5,401; N major depression = 594)

**
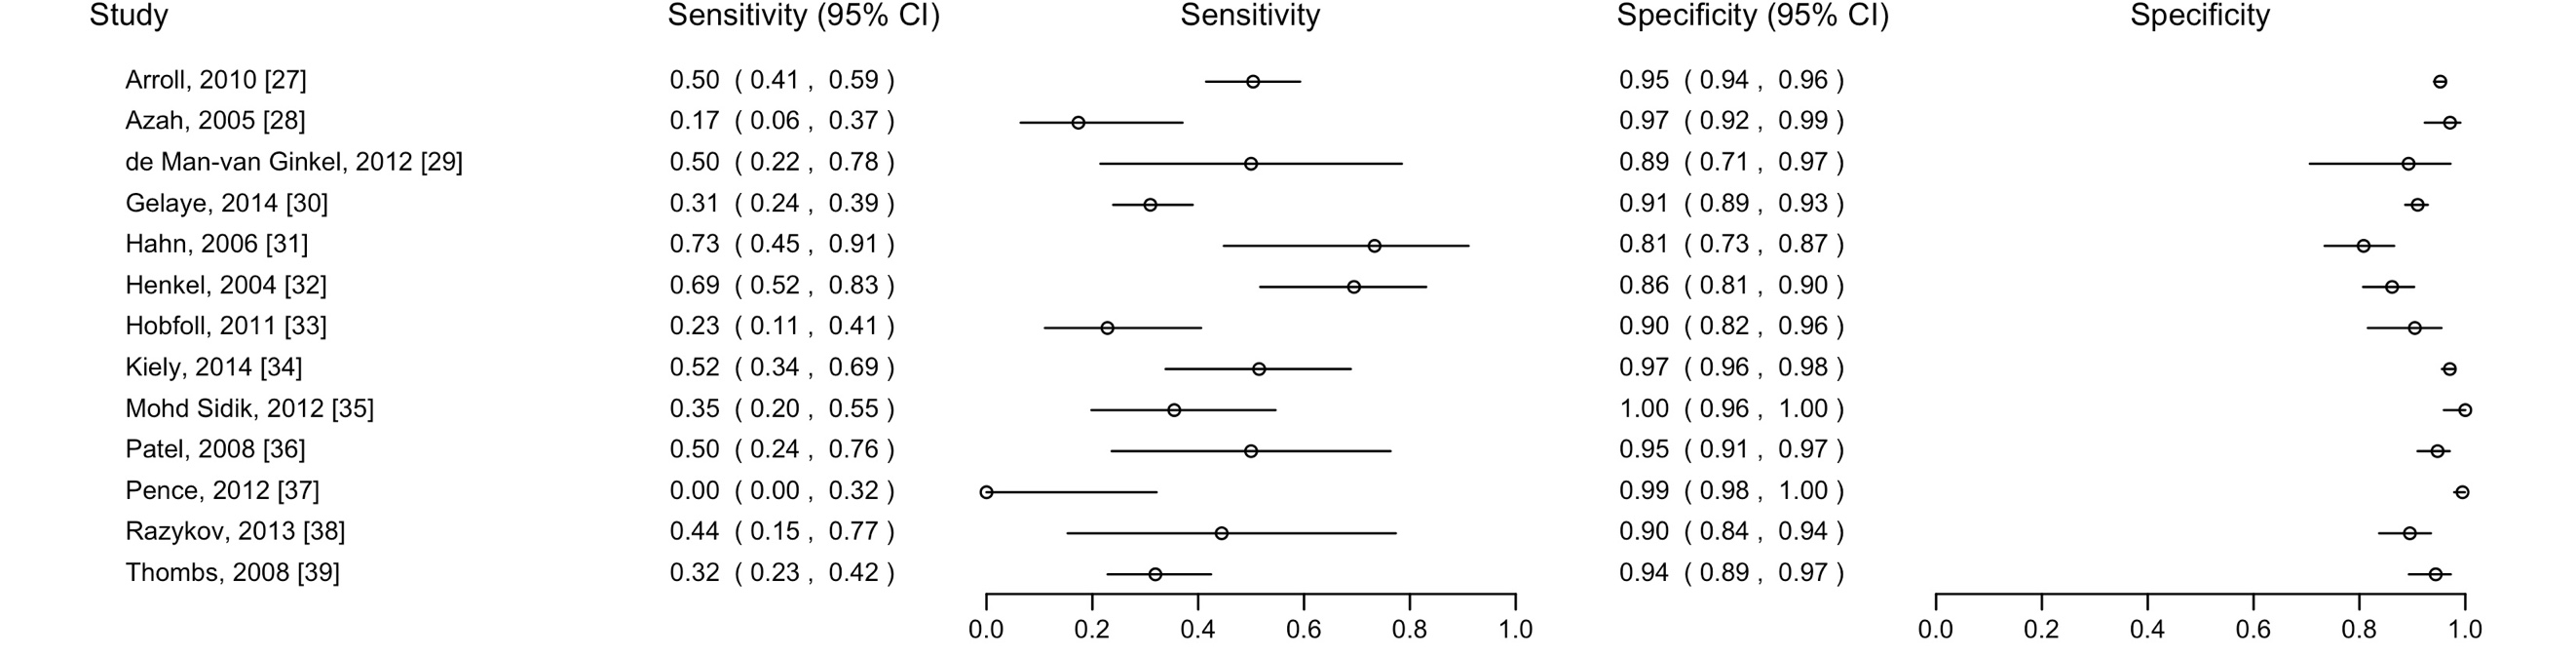
**

**Supplementary Figure 3n.** Forest plots of sensitivity and specificity estimates for the modified diagnostic PHQ-9 algorithm among participants aged ≥60, among studies that used a fully structured diagnostic interview as the reference standard (N studies = 10; N participants = 2,175; N major depression = 194)

**
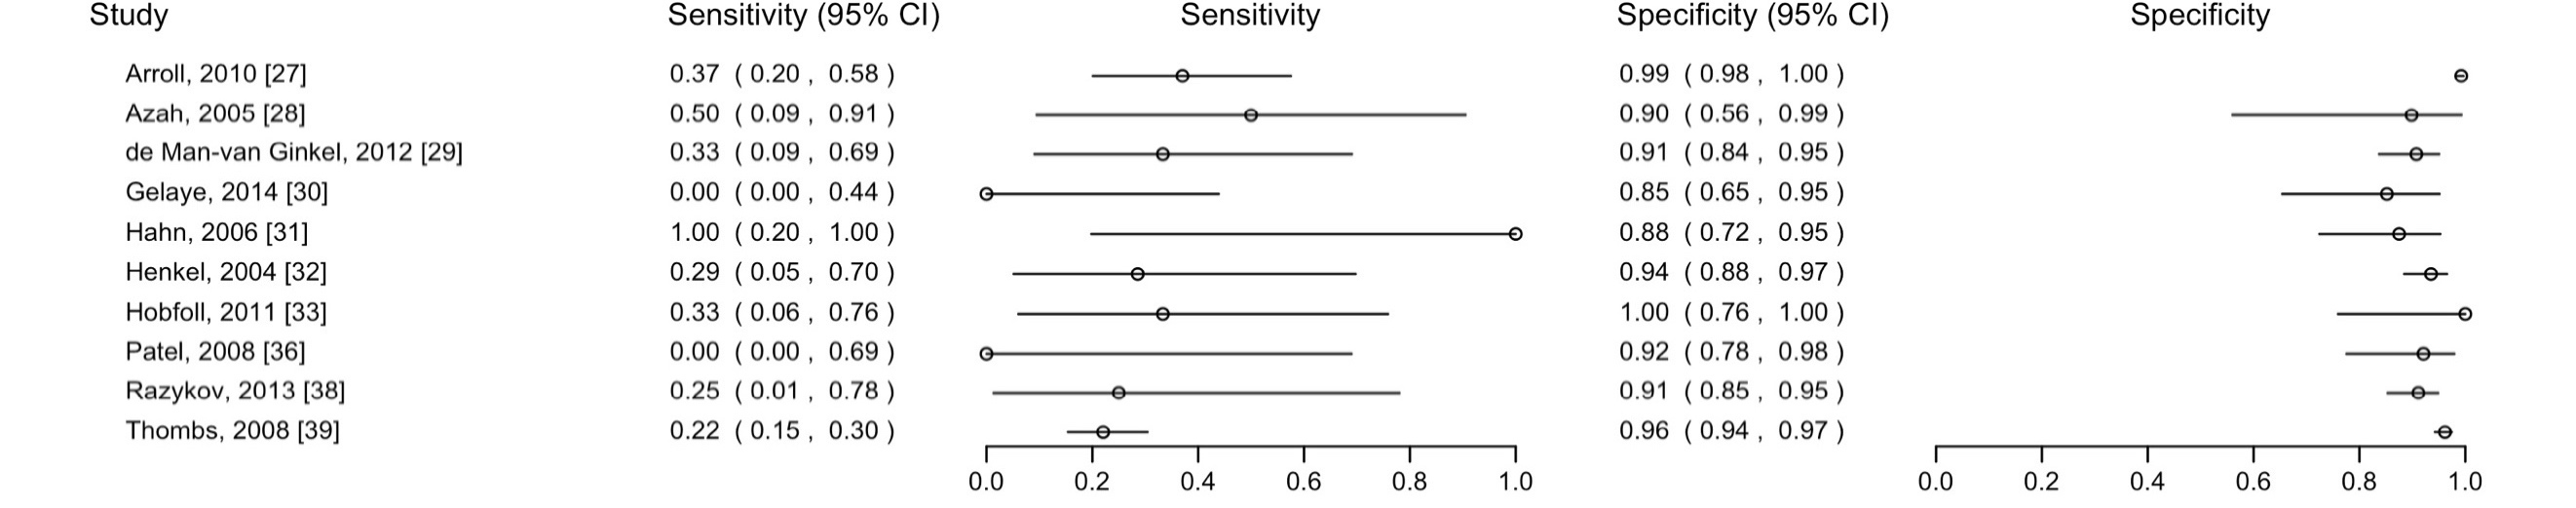
**

**Supplementary Figure 3o.** Forest plots of sensitivity and specificity estimates for the modified diagnostic PHQ-9 algorithm among women, among studies that used a fully structured diagnostic interview as the reference standard (N studies = 13; N participants = 4,261; N major depression = 456)

**
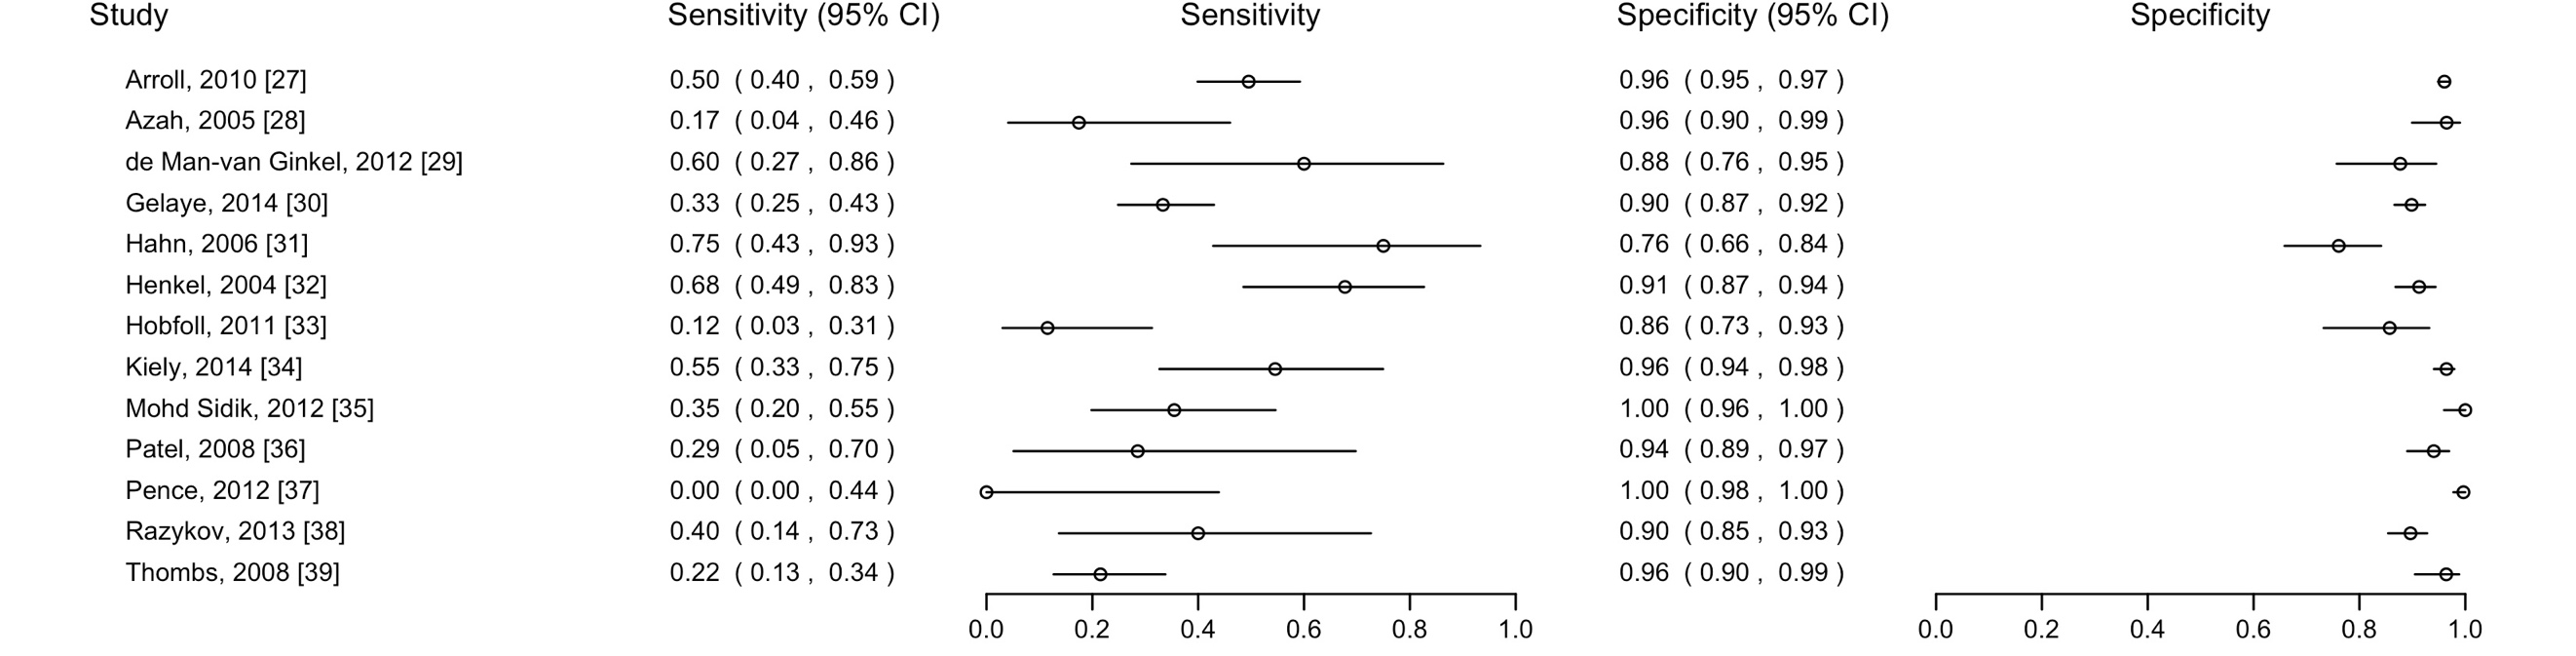
**

**Supplementary Figure 3p.** Forest plots of sensitivity and specificity estimates for the modified diagnostic PHQ-9 algorithm among men, among studies that used a fully structured diagnostic interview as the reference standard (N studies = 12; N participants = 3,316; N major depression = 332)

**
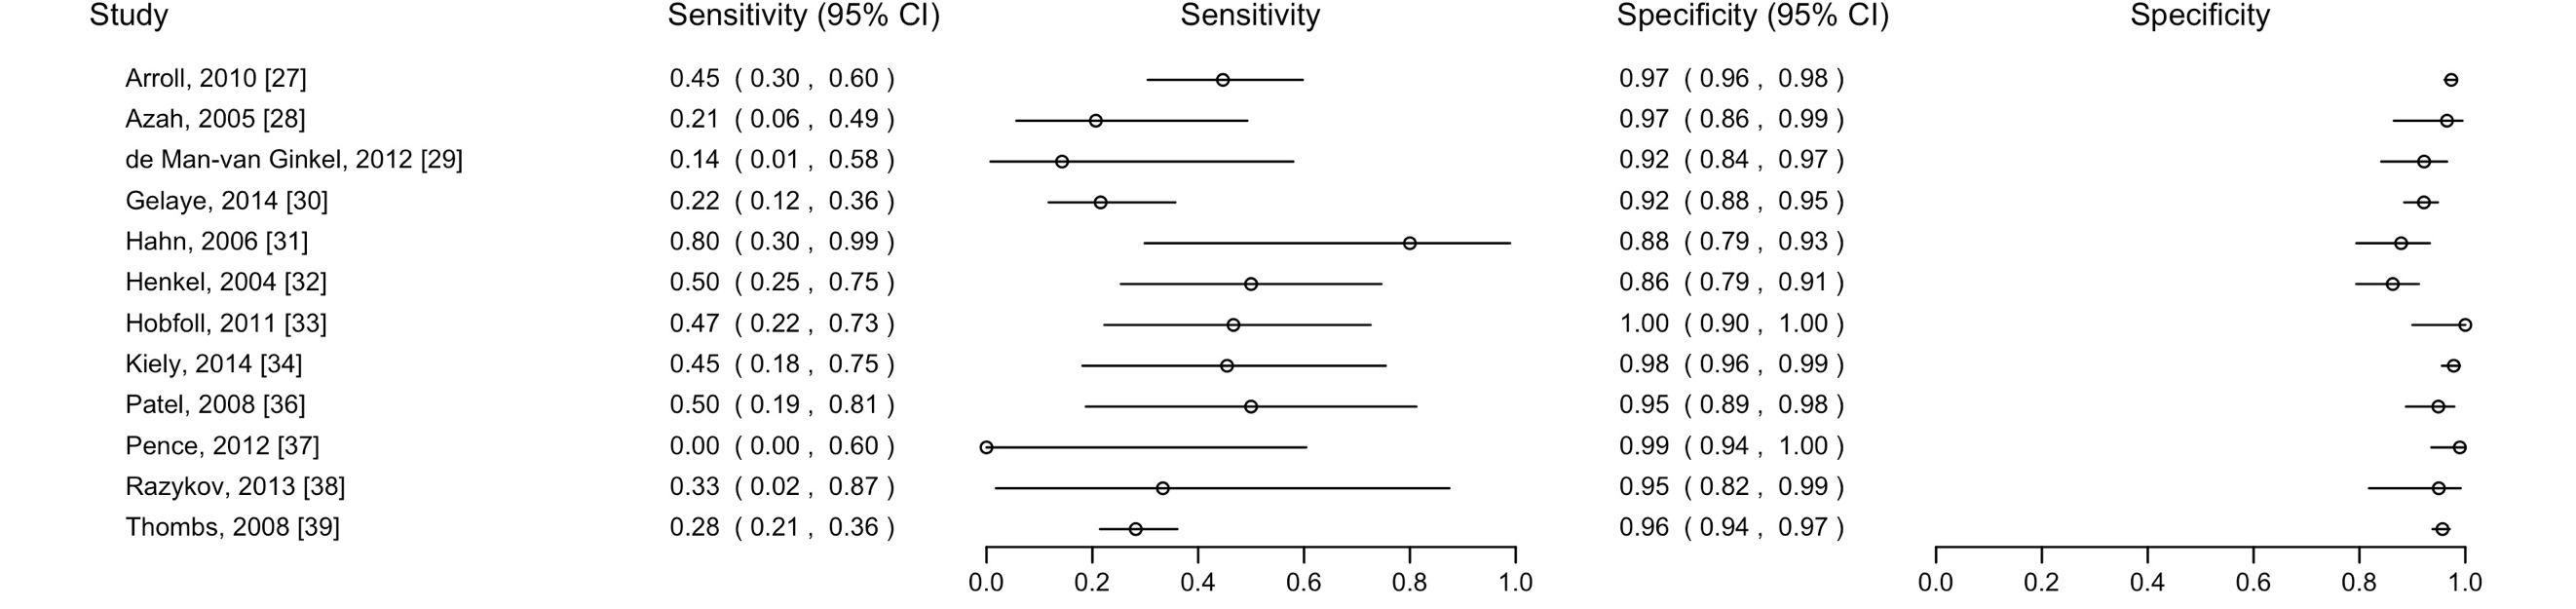
**

**Supplementary Figure 3q.** Forest plots of sensitivity and specificity estimates for the modified diagnostic PHQ-9 algorithm among participants from a country with a very high human development index, among studies that used a fully structured diagnostic interview as the reference standard (N studies = 8; N participants = 5,637; N major depression = 541)

**
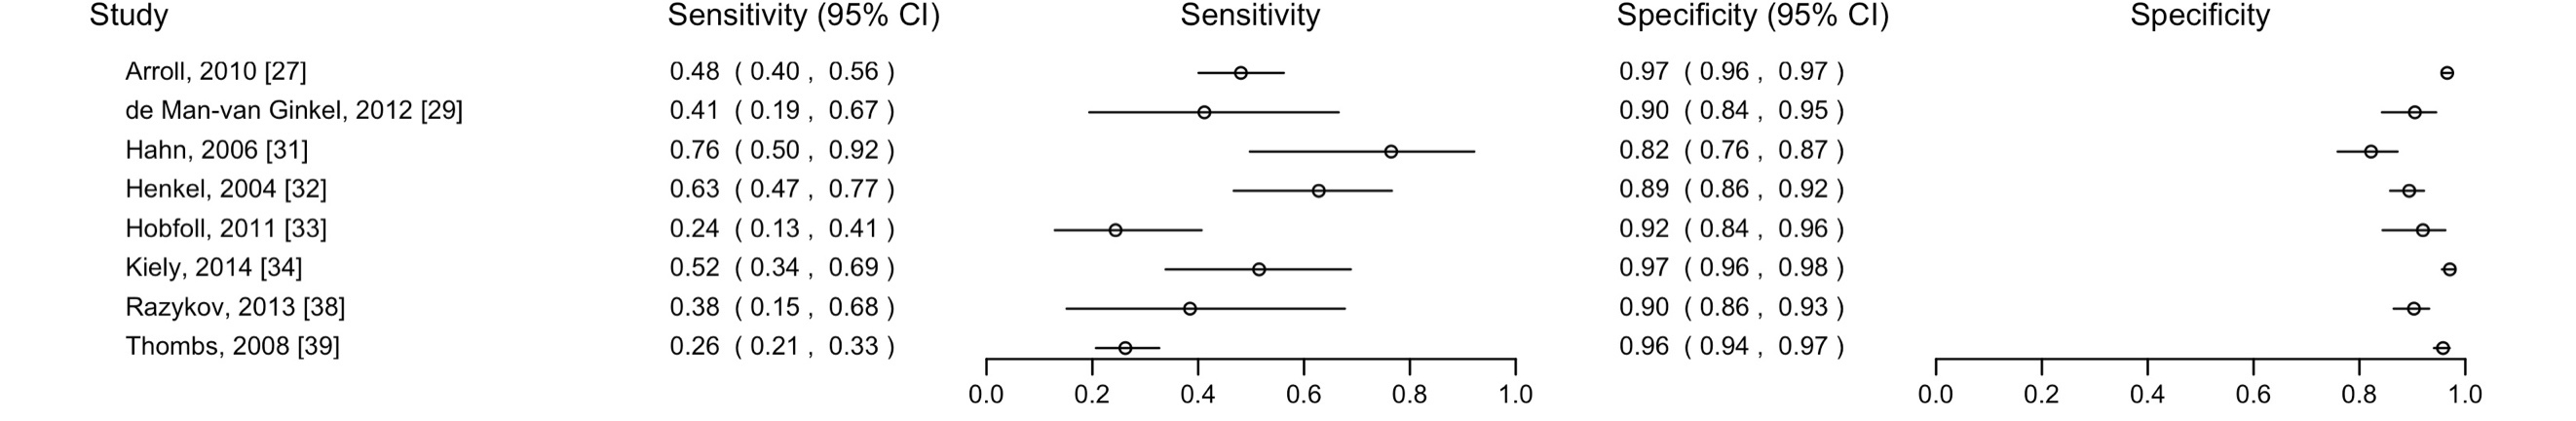
**

**Supplementary Figure 3r.** Forest plots of sensitivity and specificity estimates for the modified diagnostic PHQ-9 algorithm, among participants from a country with a low, medium or high-country human development index, among studies that used a fully structured diagnostic interview as the reference standard (N studies = 5; N participants = 1,940; N major depression = 247)


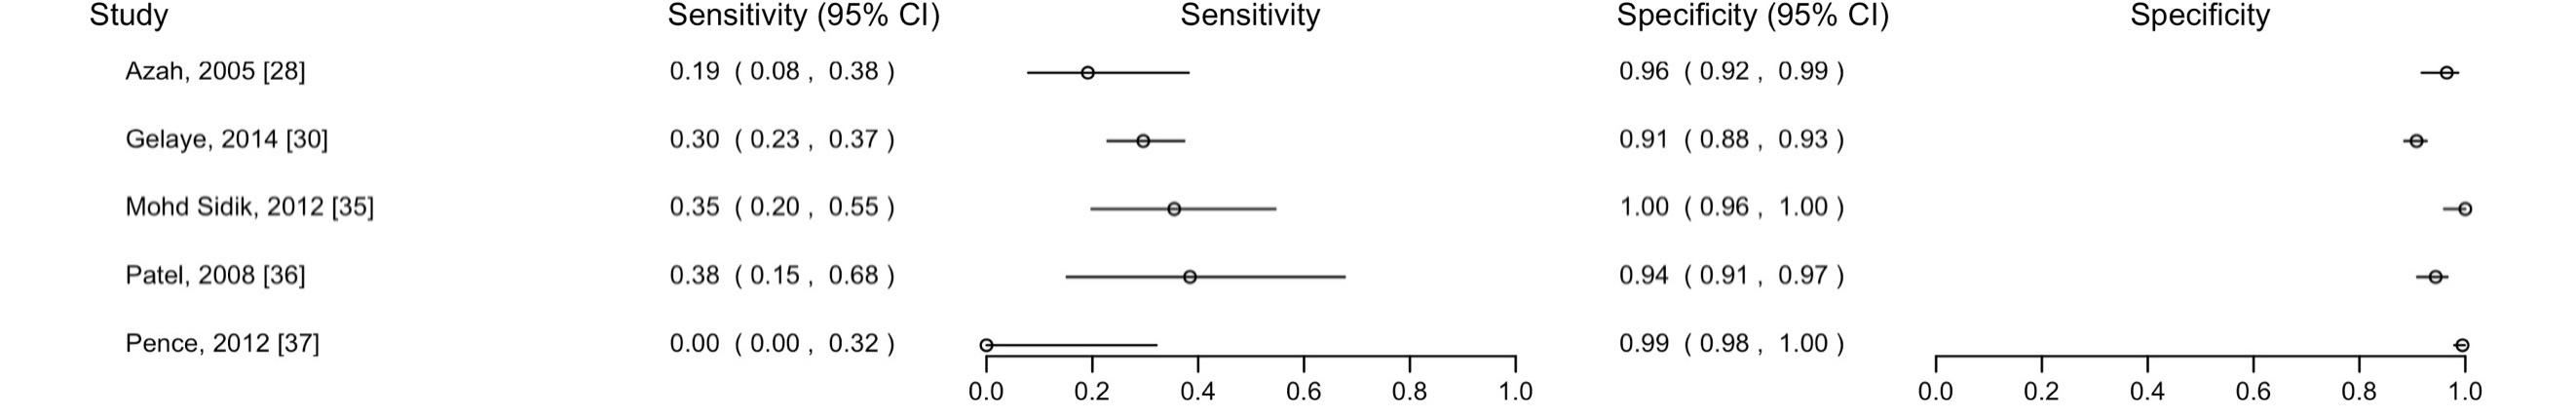


**Supplementary Figure 3s.** Forest plots of sensitivity and specificity estimates for the modified diagnostic PHQ-9 algorithm among participants from a non-medical setting, among studies that used a fully structured diagnostic interview as the reference standard (N studies = 2; N participants = 963; N major depression = 74)


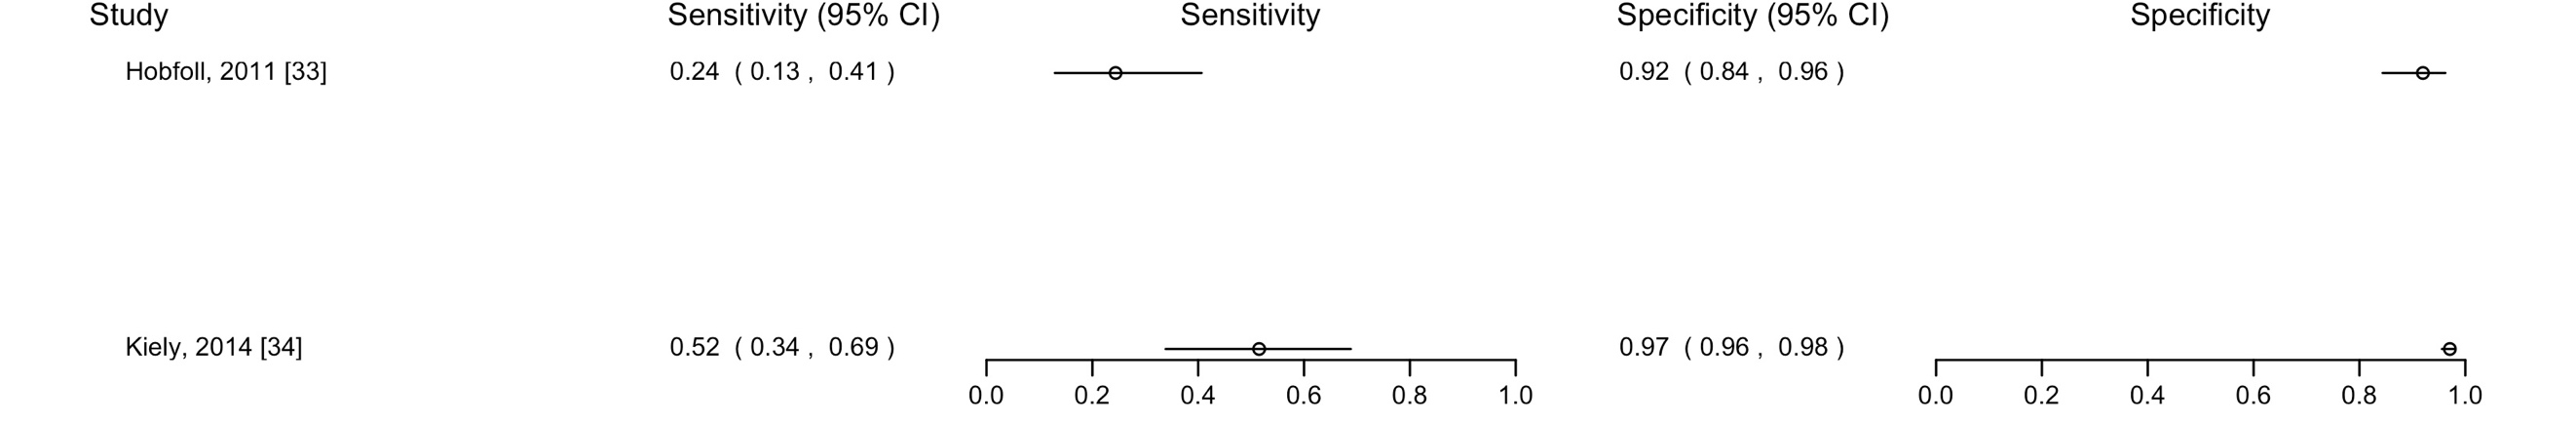


**Supplementary Figure 3t.** Forest plots of sensitivity and specificity estimates for the modified diagnostic PHQ-9 algorithm among participants from a primary care setting, among studies that used a fully structured diagnostic interview as the reference standard (N studies = 5; N participants = 3,578; N major depression = 273)

**
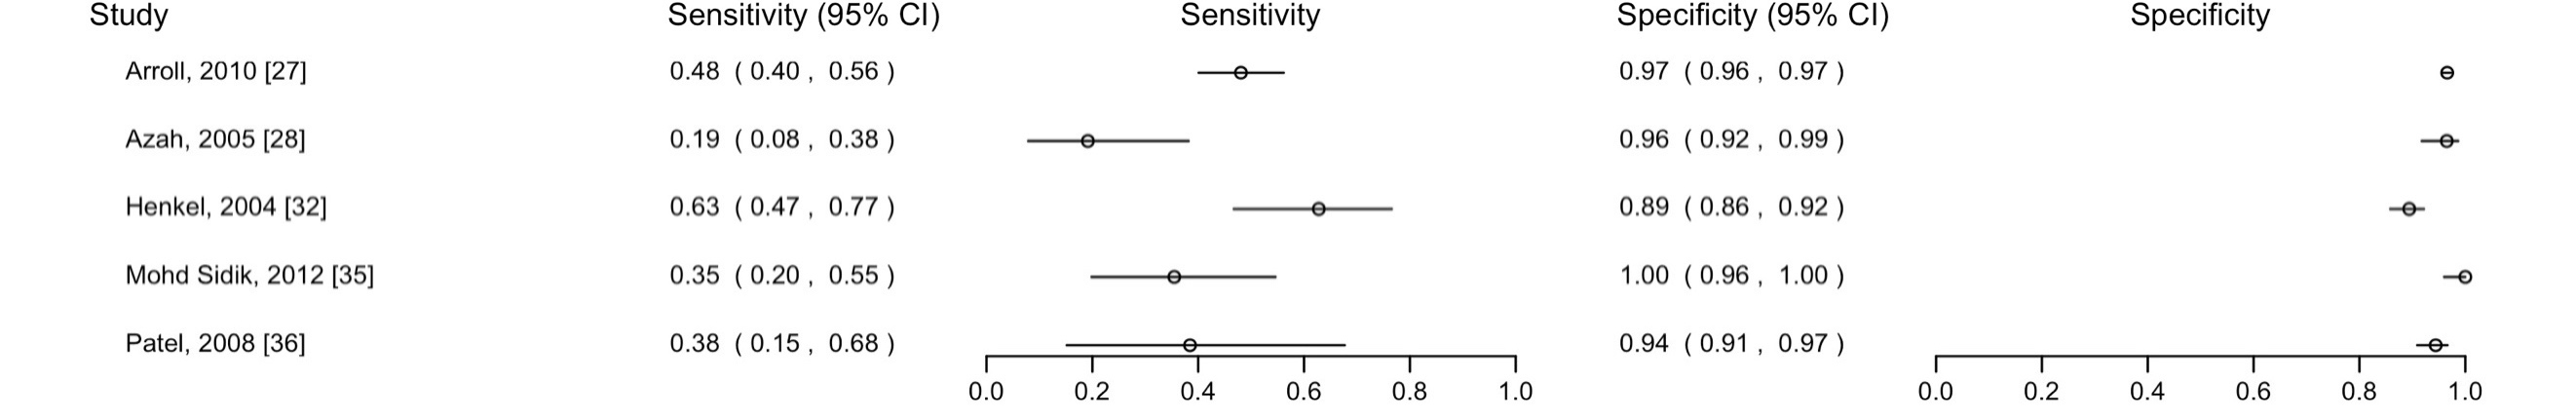
**

**Supplementary Figure 3u.** Forest plots of sensitivity and specificity estimates for the modified diagnostic PHQ-9 algorithm among participants from an inpatient specialty care setting, among studies that used a fully structured diagnostic interview as the reference standard (N studies = 2; N participants = 372; N major depression = 34)

**
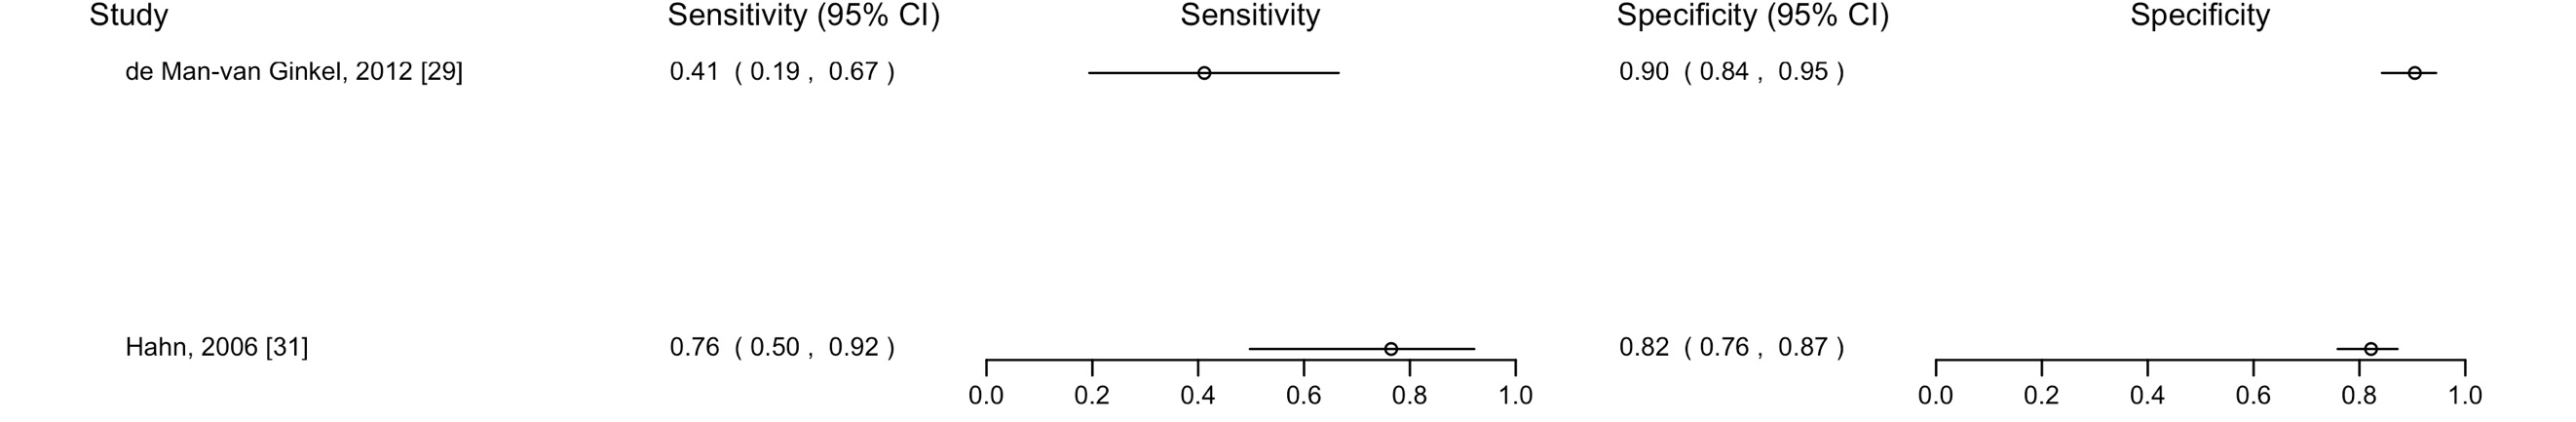
**

**Supplementary Figure 3v.** Forest plots of sensitivity and specificity estimates for the modified diagnostic PHQ-9 algorithm among participants from an outpatient specialty care setting, among studies that used a fully structured diagnostic interview as the reference standard (N studies = 4; N participants = 2,664; N major depression = 407)

**
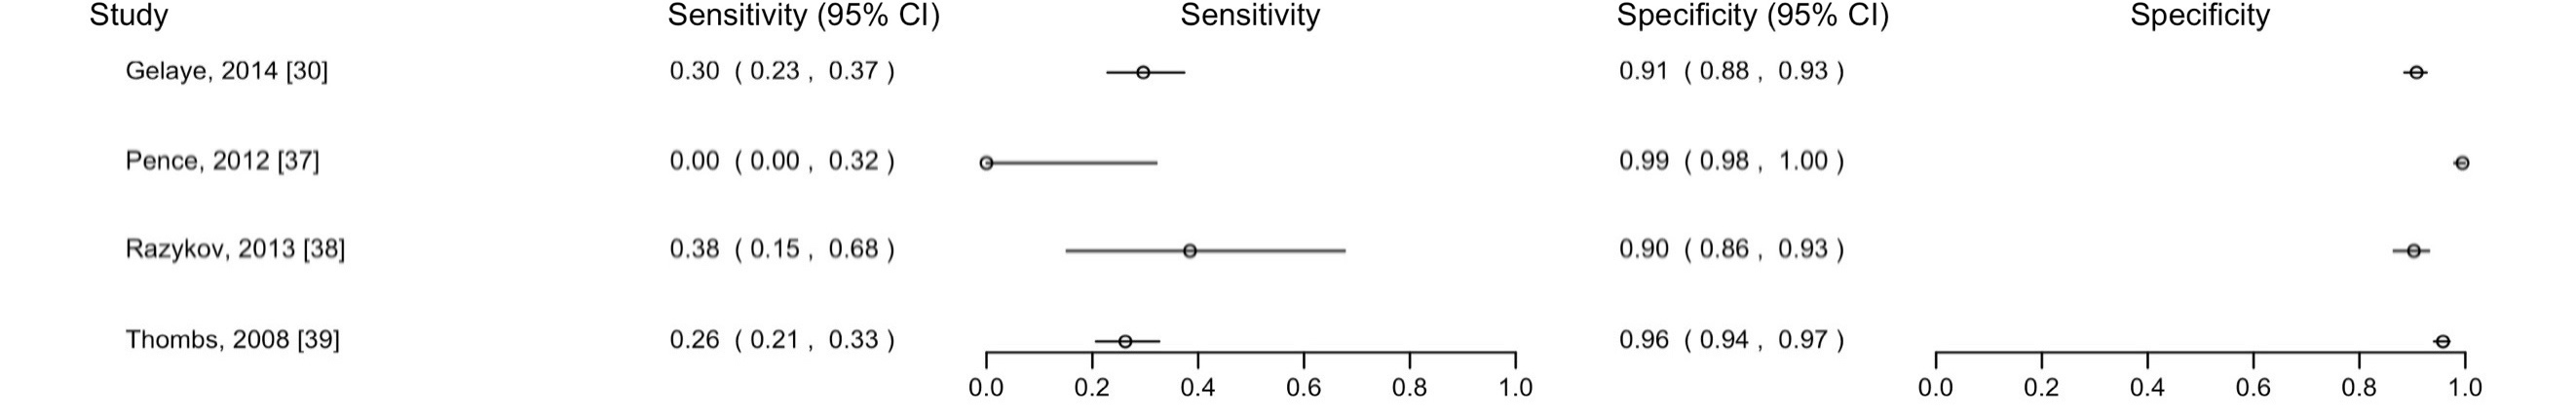
**

**Supplementary Figure 3w.** Forest plots of sensitivity and specificity estimates for the modified diagnostic PHQ-9 algorithm, among studies that used the MINI as the reference standard (N studies = 14; N participants = 2,780; N major depression = 516)

**
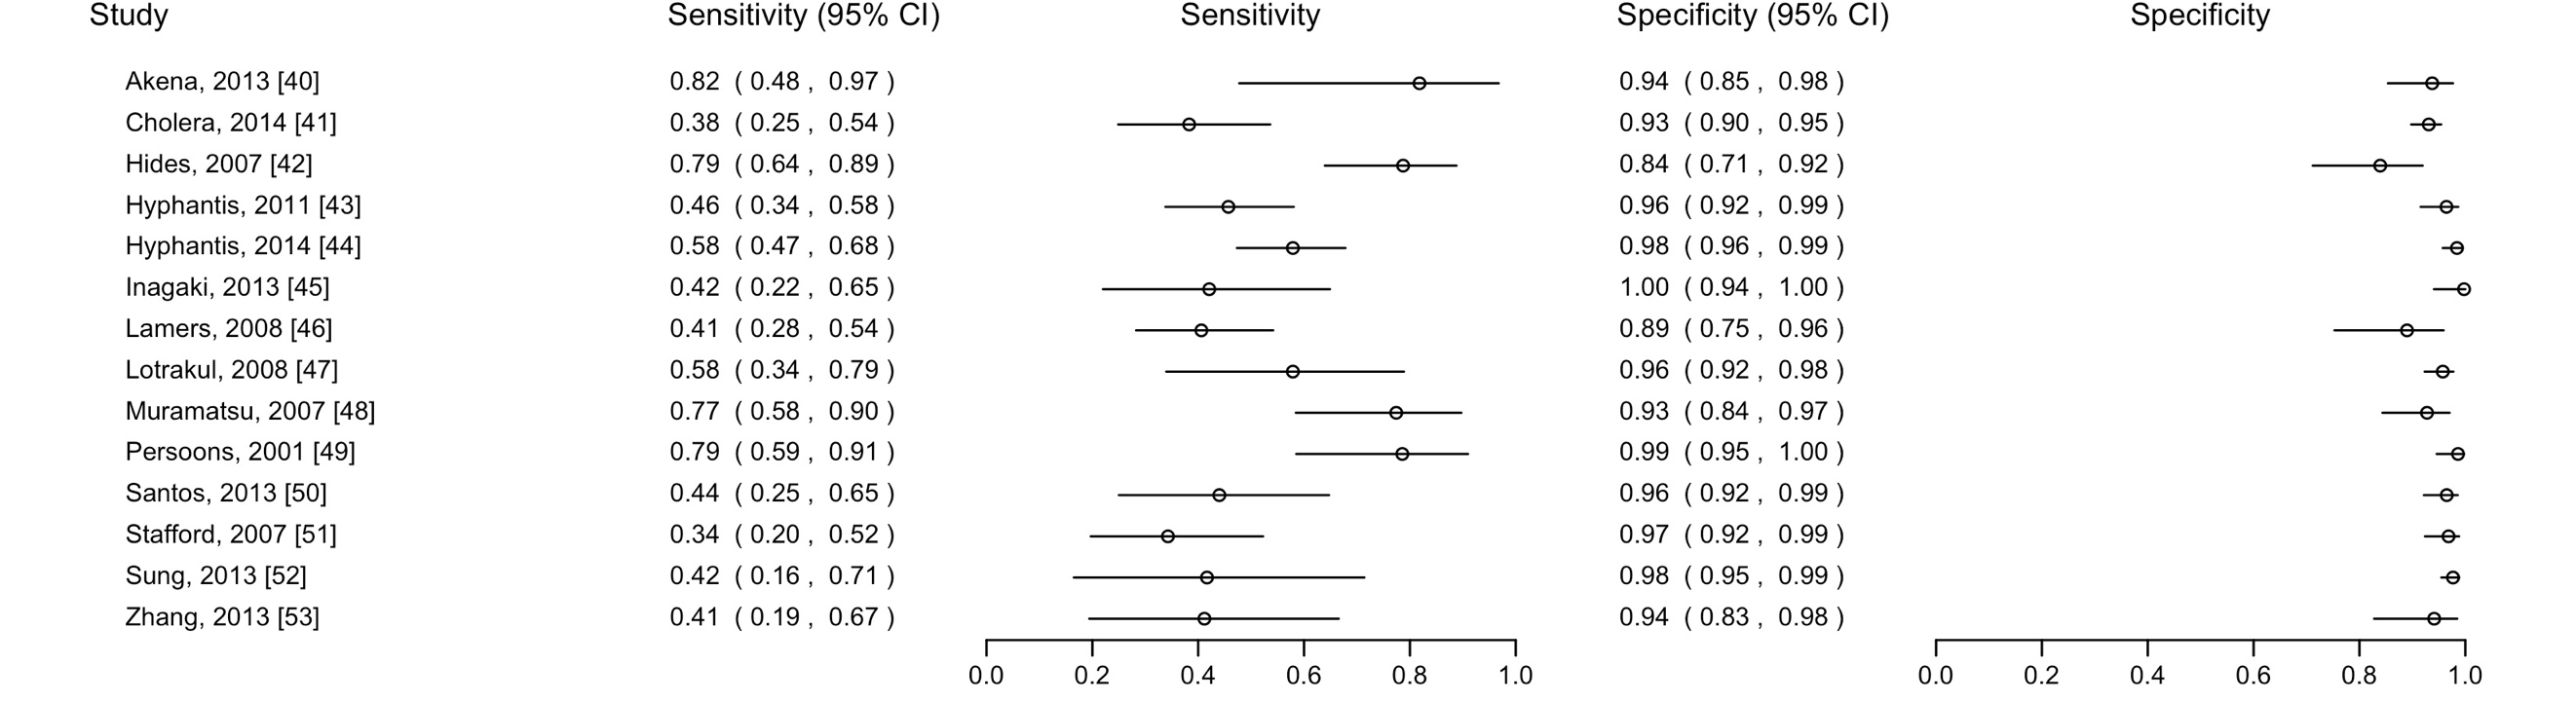
**

**Supplementary Figure 3x.** Forest plots of sensitivity and specificity estimates for the modified diagnostic PHQ-9 algorithm among participants aged <60, among studies that used the MINI as the reference standard (N studies = 13; N participants = 1,885; N major depression = 290)

**
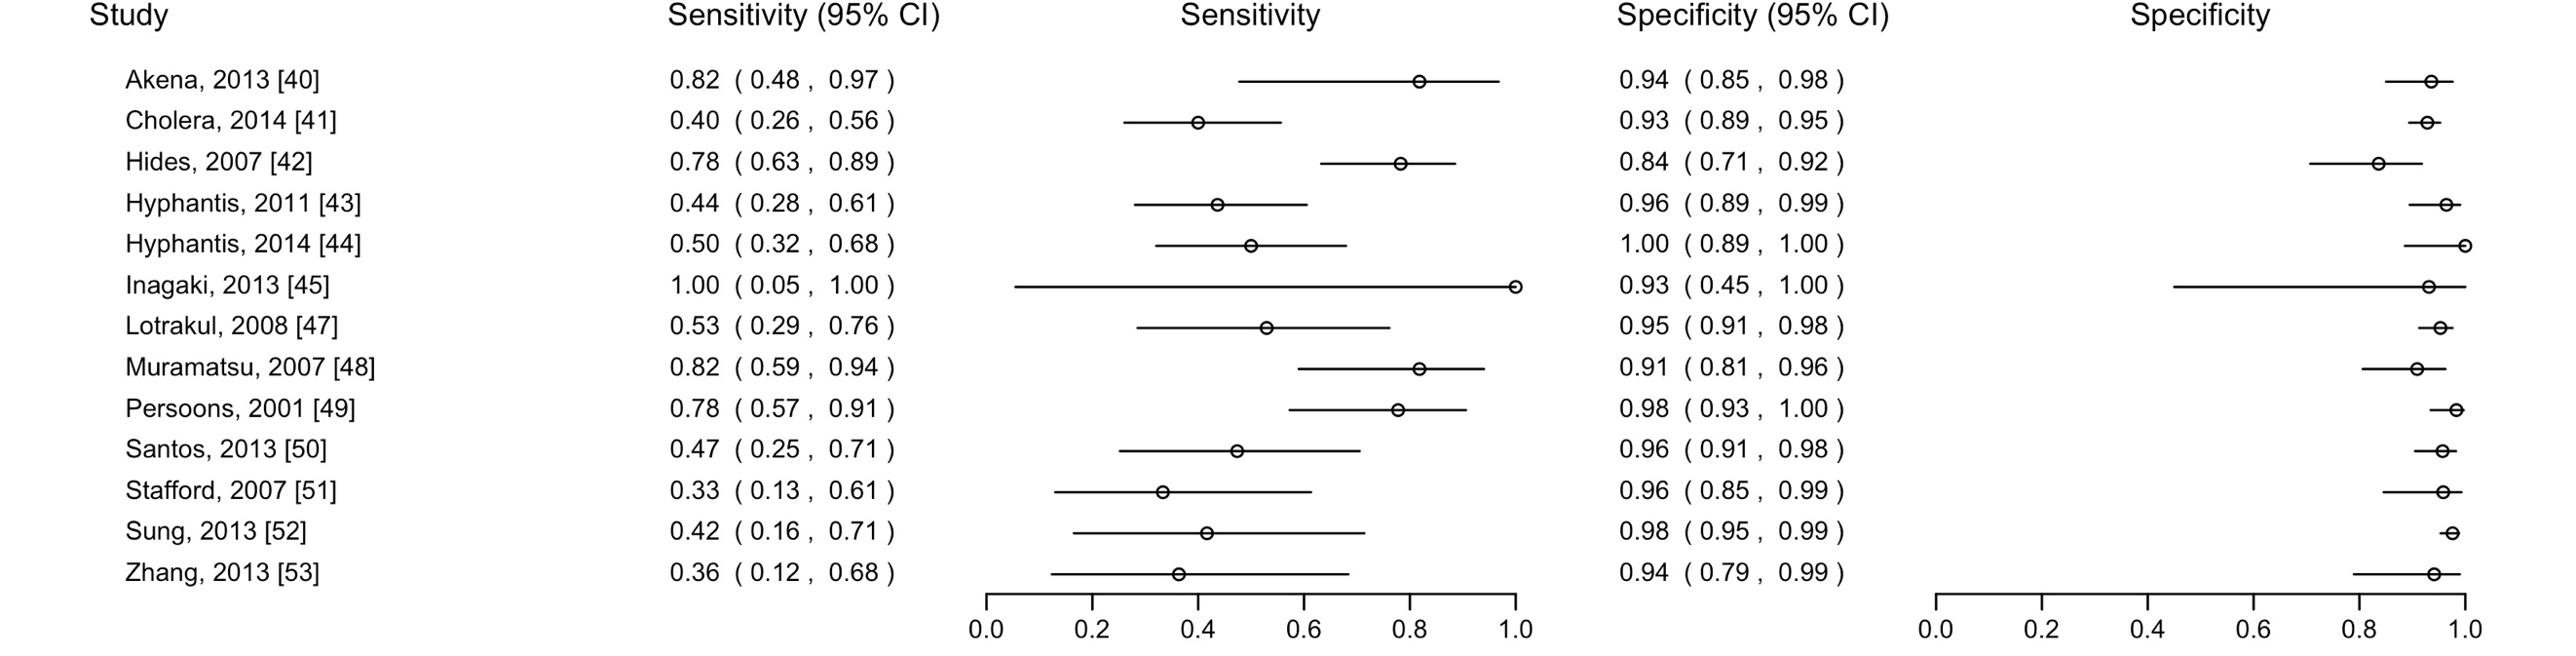
**

**Supplementary Figure 3y.** Forest plots of sensitivity and specificity estimates for the modified diagnostic PHQ-9 algorithm among participants aged ≥60, among studies that used the MINI as the reference standard (N studies = 12; N participants = 880; N major depression = 226)

**
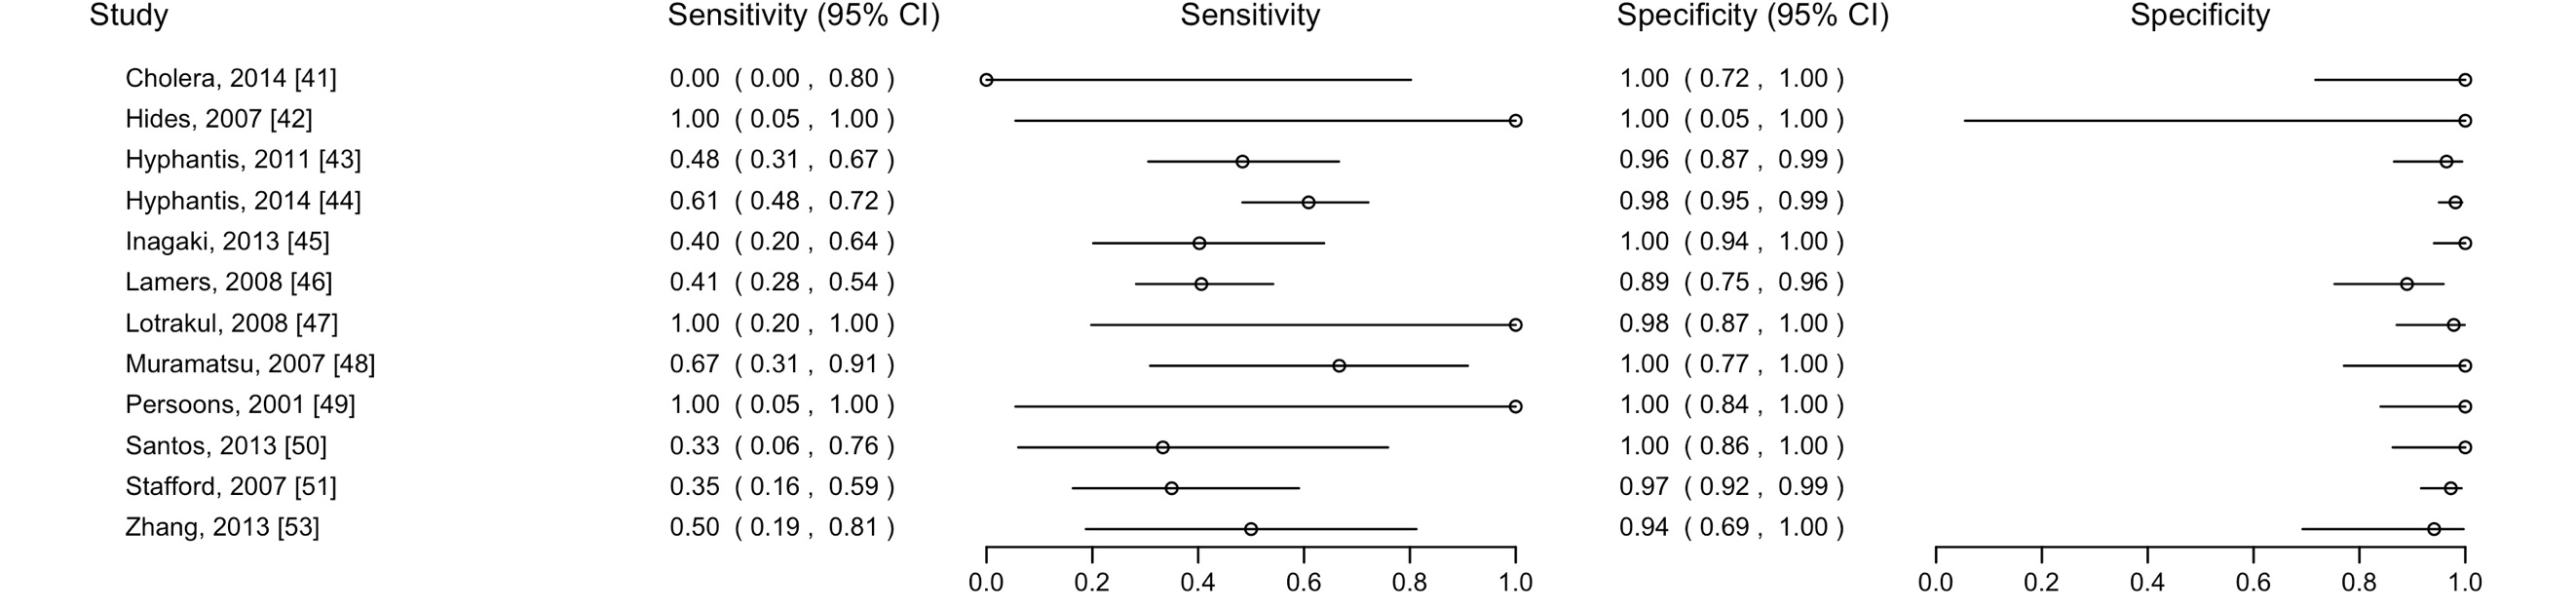
**

**Supplementary Figure 3z.** Forest plots of sensitivity and specificity estimates the modified diagnostic PHQ-9 algorithm among women, among studies that used the MINI as the reference standard (N studies = 14; N participants = 1,580; N major depression = 325)

**
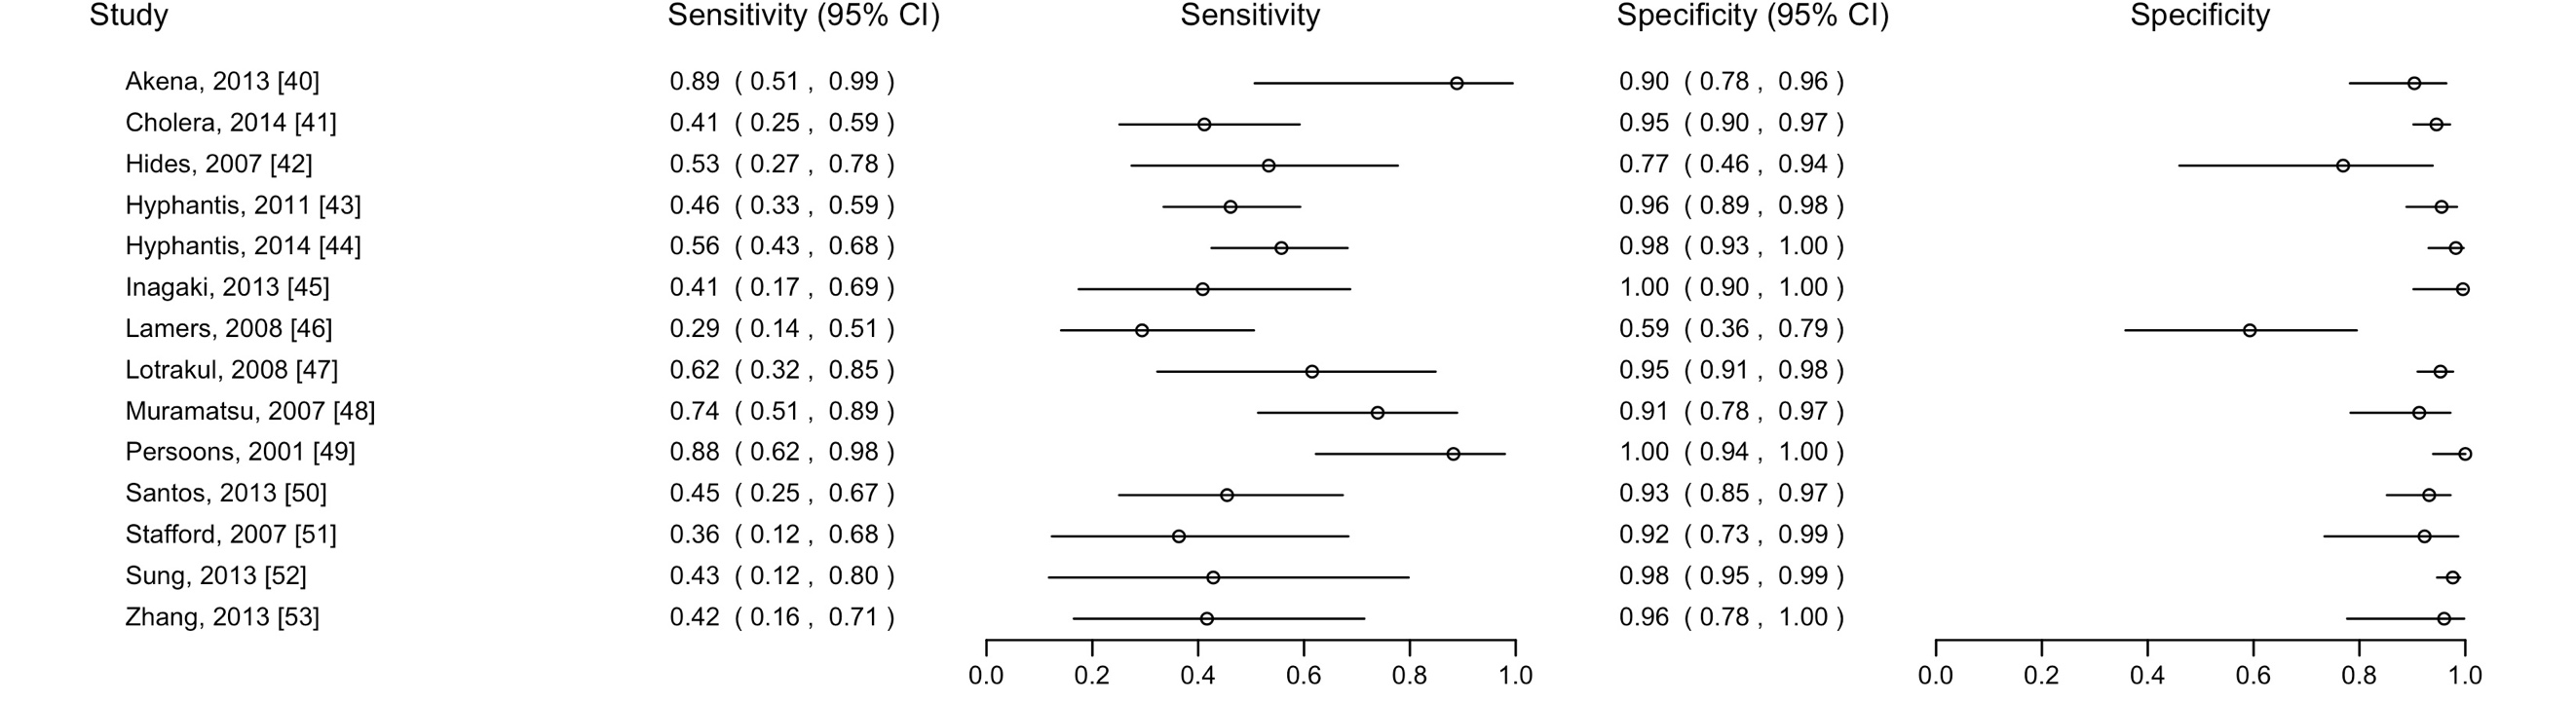
**

**Supplementary Figure 3aa.** Forest plots of sensitivity and specificity estimates for the modified diagnostic PHQ-9 algorithm among men, among studies that used the MINI as the reference standard (N studies = 14; N participants = 1,200; N major depression = 191)

**
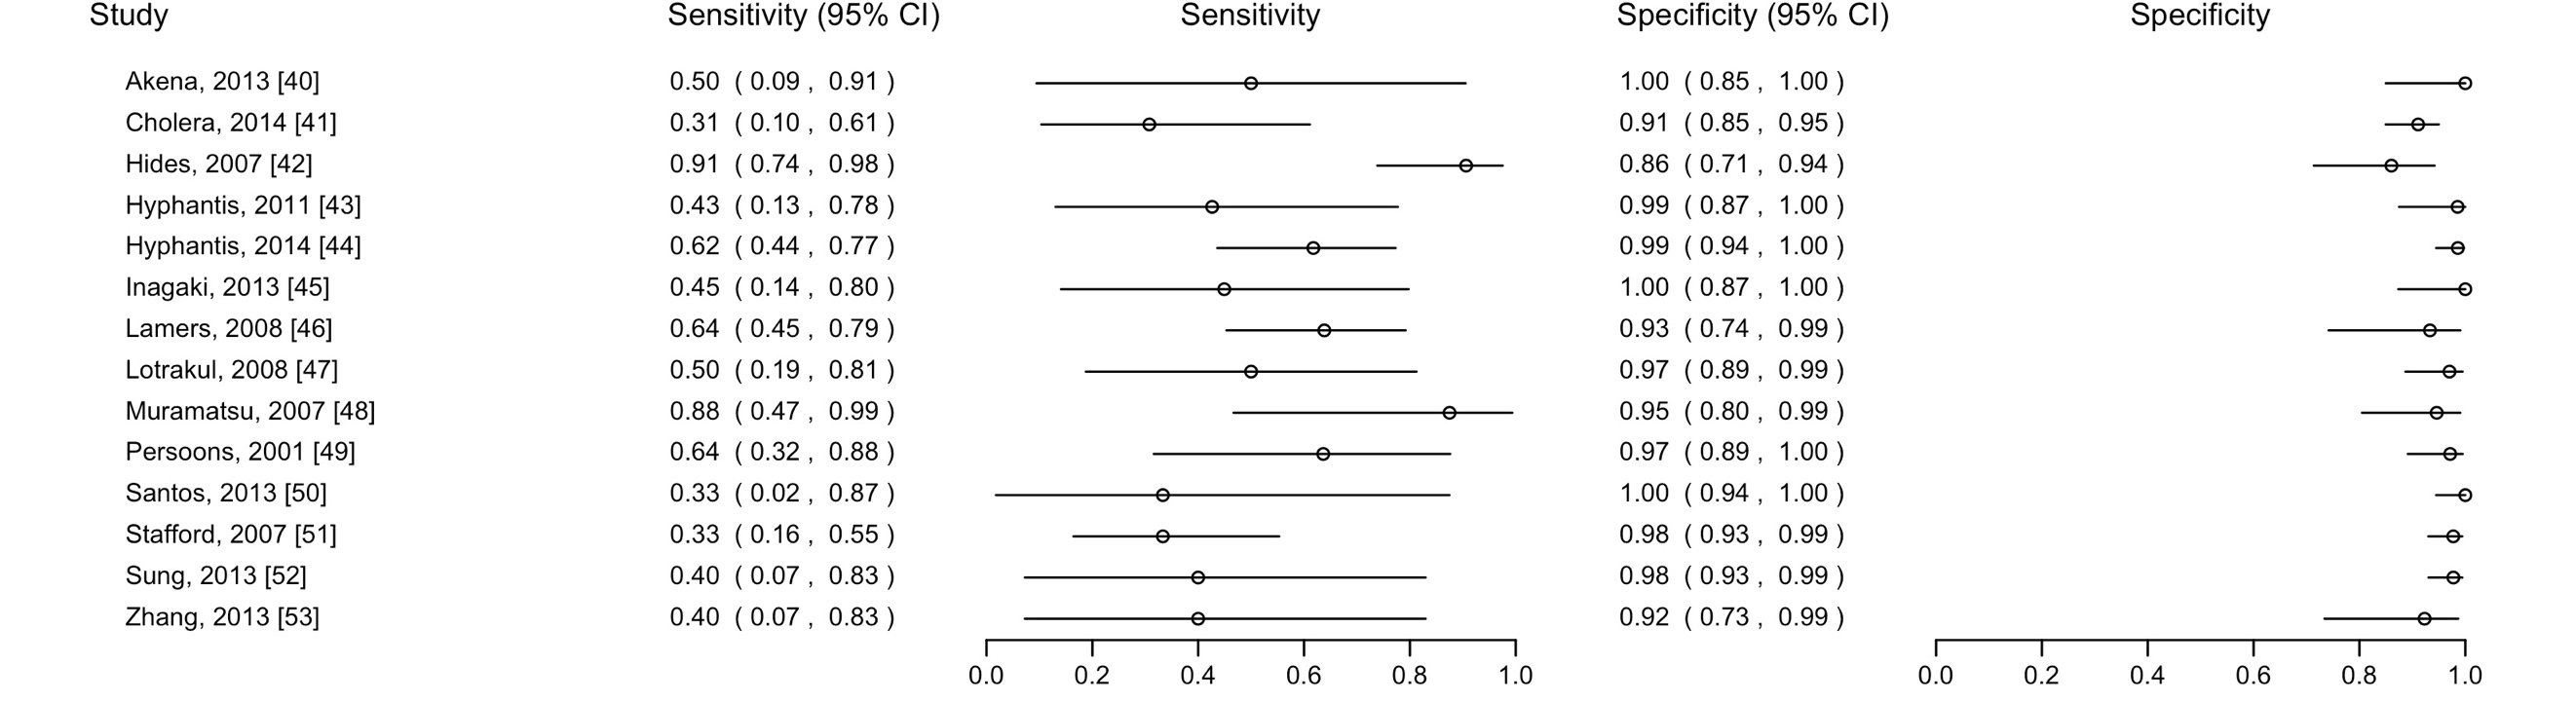
**

**Supplementary Figure 3ab.** Forest plots of sensitivity and specificity estimates for the modified diagnostic PHQ-9 algorithm among participants from a country with a very high human development index, among studies that used the MINI as the reference standard (N studies = 9; N participants = 1,752; N major depression = 397)

**
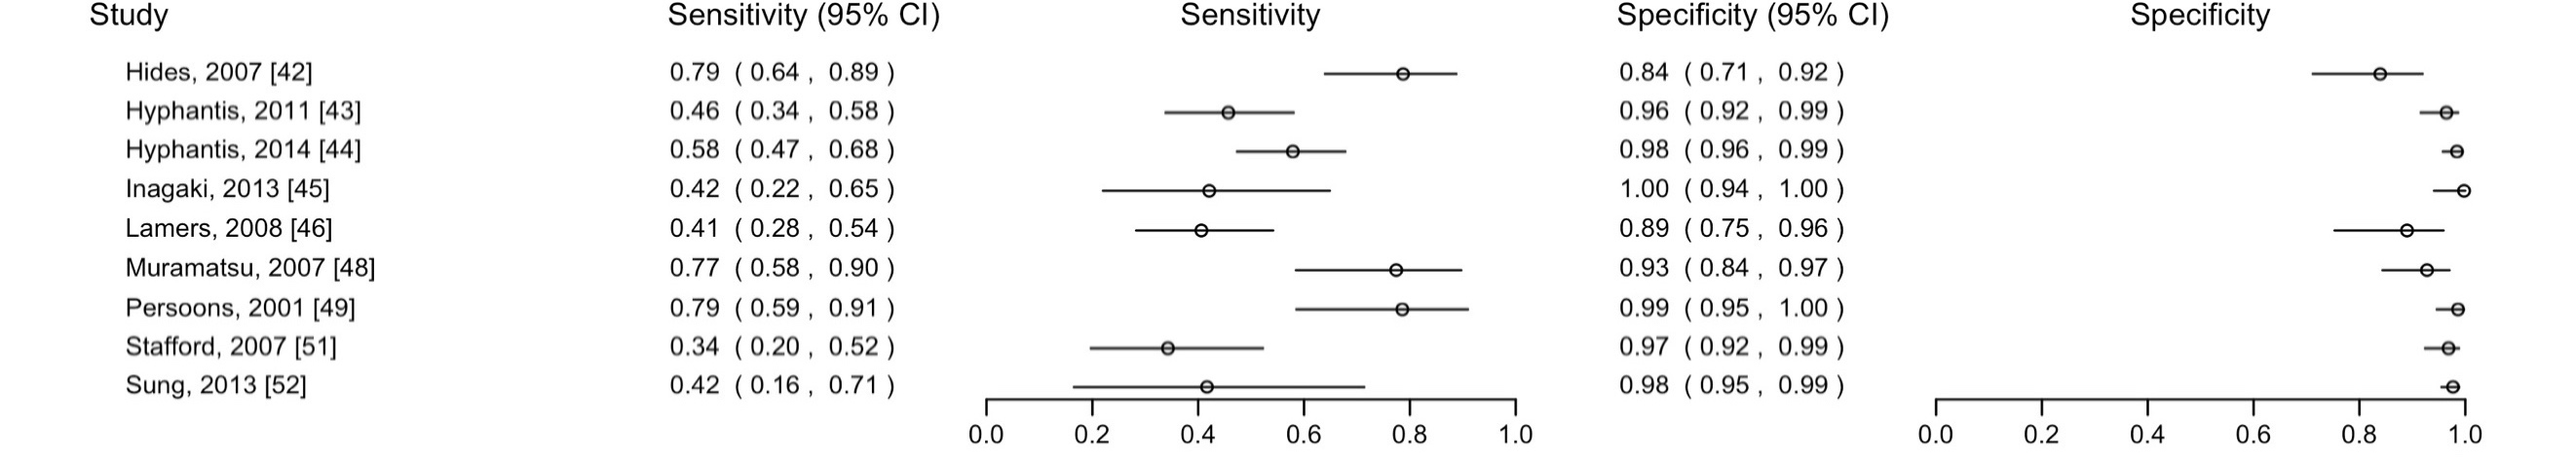
**

**Supplementary Figure 3ac.** Forest plots of sensitivity and specificity estimates for the modified diagnostic PHQ-9 algorithm among participants from a country with a low, medium or high-country human development index, among studies that used the MINI as the reference standard (N studies = 5; N participants = 1,028; N major depression = 119)

**
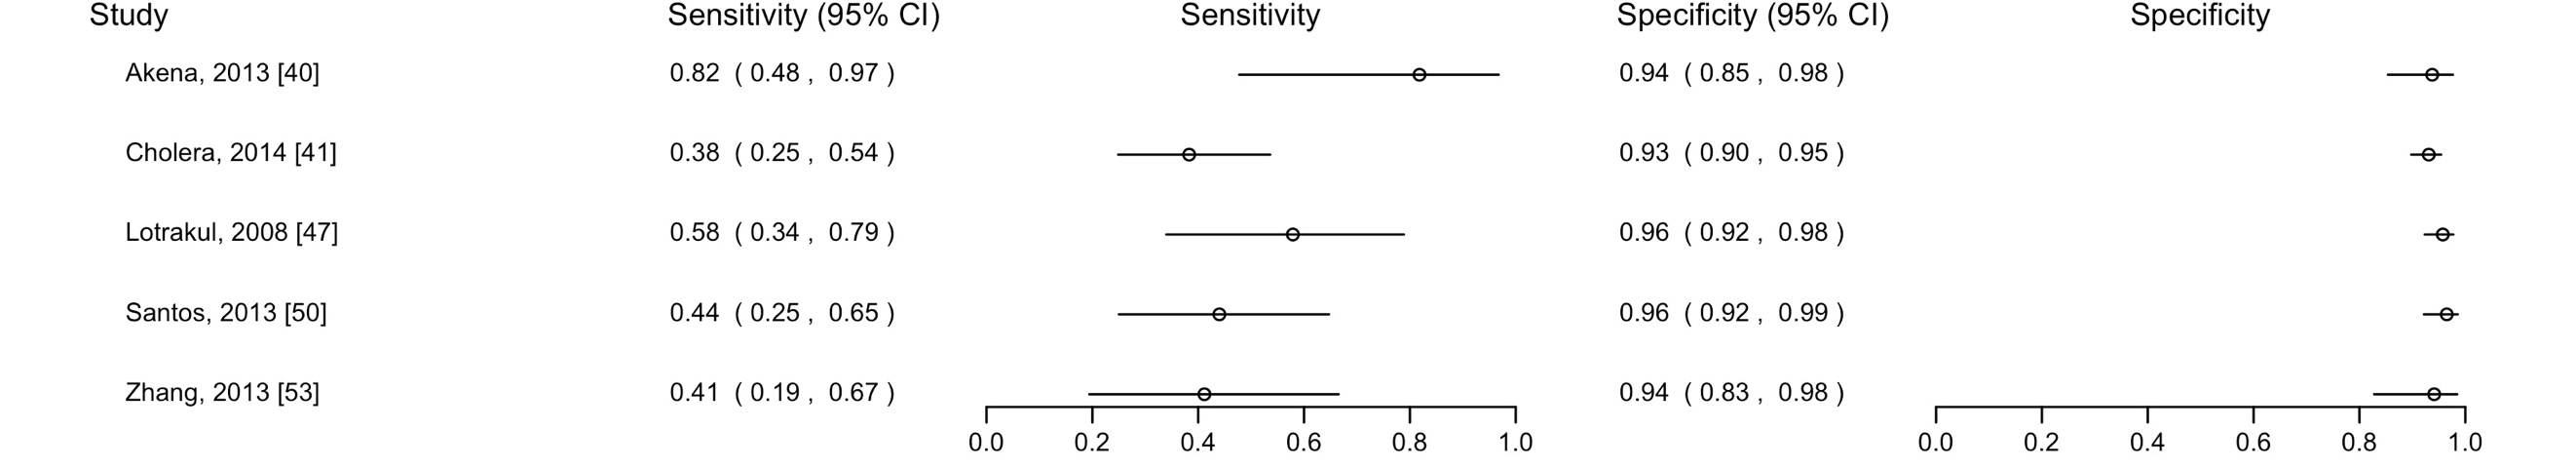
**

**Supplementary Figure 3ad.** Forest plots of sensitivity and specificity estimates for the modified diagnostic PHQ-9 algorithm among participants from a non-medical setting, among studies that used the MINI as the reference standard (N studies = 2; N participants = 299; N major depression = 72)

**
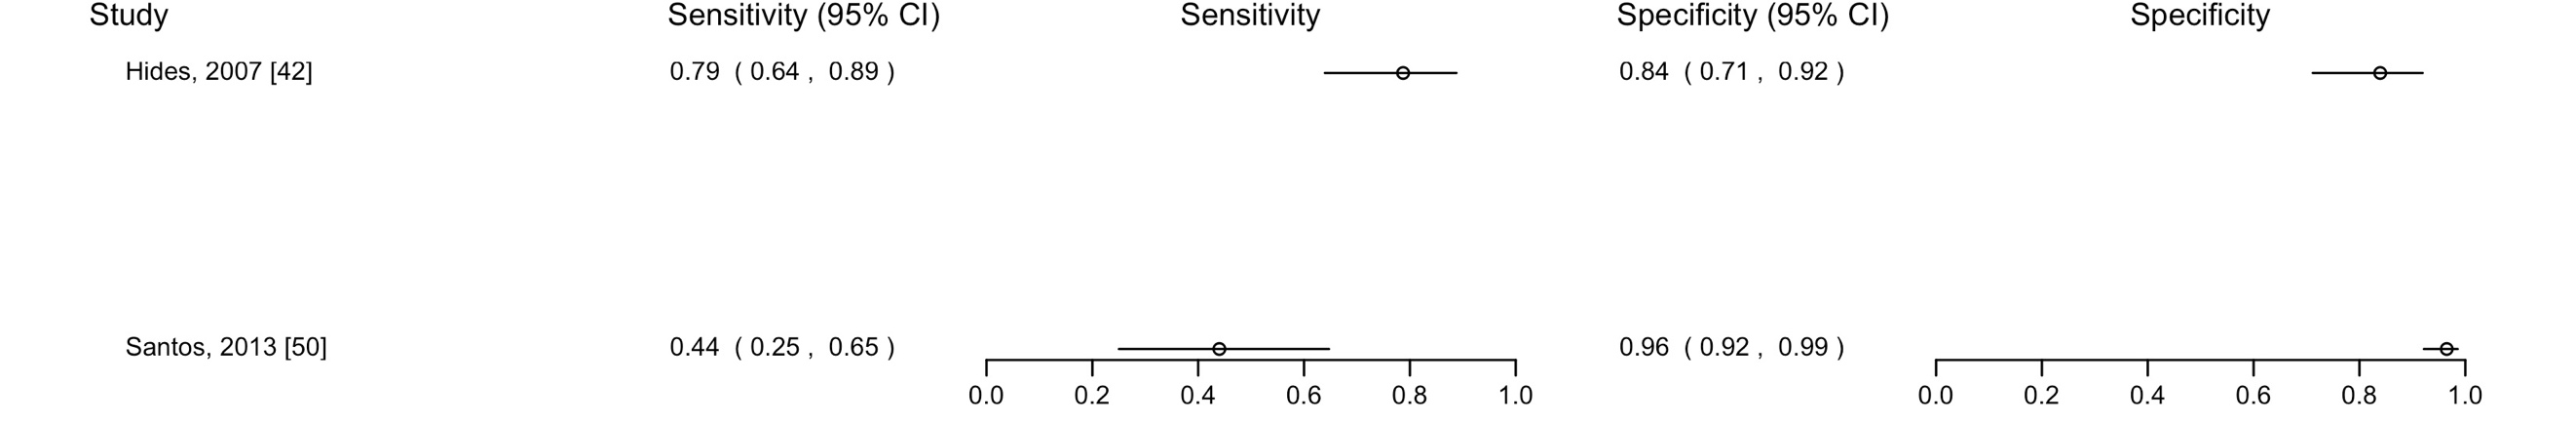
**

**Supplementary Figure 3ae.** Forest plots of sensitivity and specificity estimates for the modified diagnostic PHQ-9 algorithm among participants from a primary care setting, among studies that used the MINI as the reference standard (N studies = 5; N participants = 1,290; N major depression = 168)

**
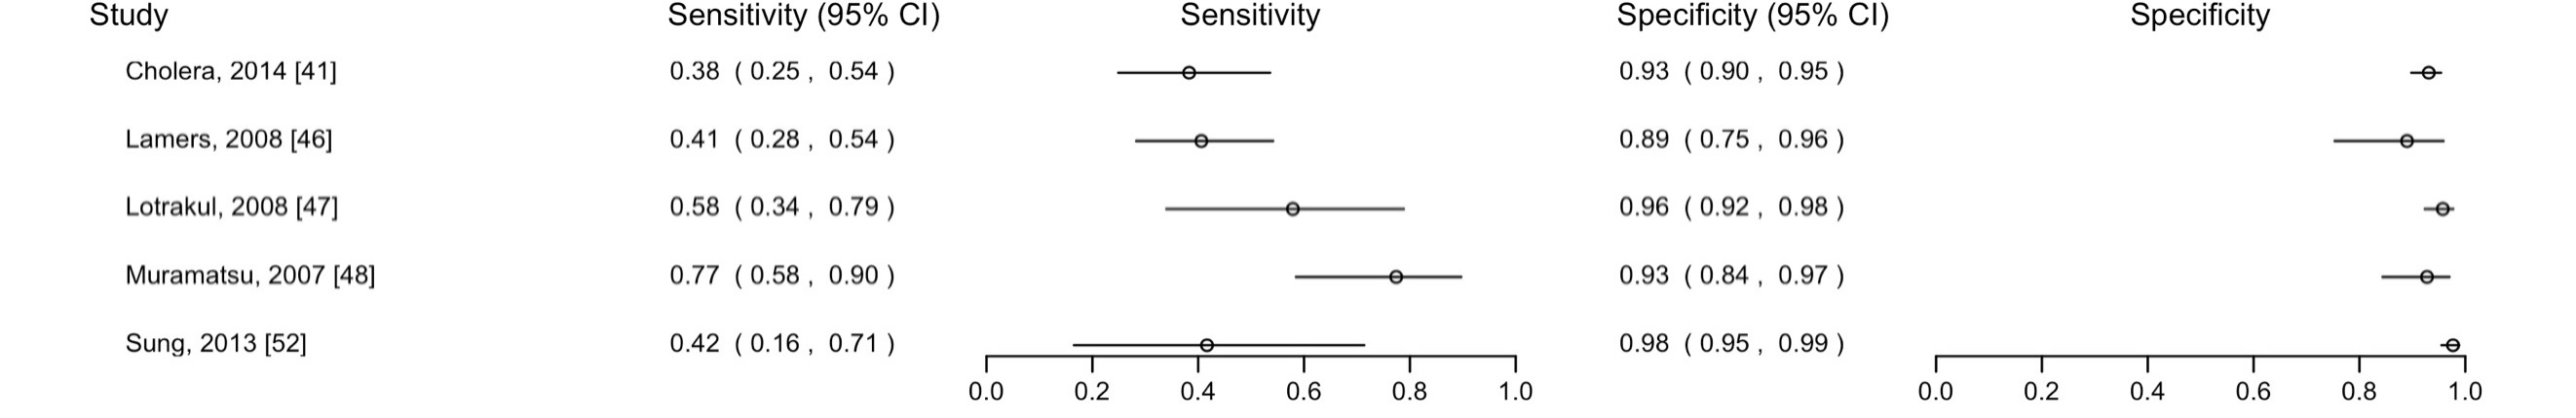
**

**Supplementary Figure 3af.** Forest plots of sensitivity and specificity estimates for the modified diagnostic PHQ-9 algorithm among participants from a specialty care setting, among studies that used the MINI as the reference standard (N studies = 8; N participants = 1,191; N major depression = 276)

**
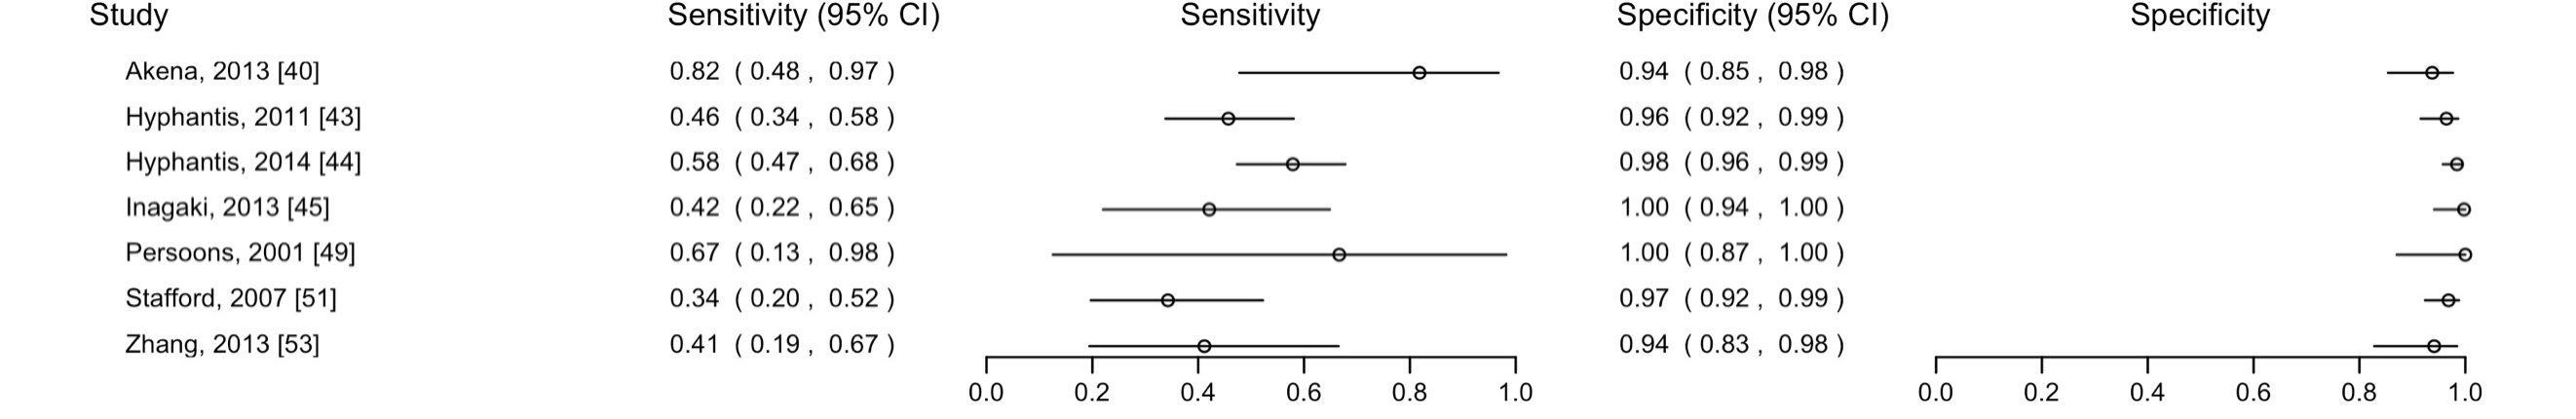
**

**Supplementary Figure 4a-b.** Nomograms of a) positive predictive value and b) negative predictive value for the original PHQ-9 diagnostic algorithm for major depression prevalence values of 5 to 25% for semi-structured diagnostic interviews, fully structured diagnostic interviews, and the MINI.

**Supplementary Figure 5a-b.** Nomograms of a) positive predictive value and b) negative predictive value for the modified PHQ-9 diagnostic algorithm for major depression prevalence values of 5 to 25% for semi-structured diagnostic interviews, fully structured diagnostic interviews, and the MINI.

**Supplementary Table 1**. Reasons for exclusion for all articles excluded at full-text level (N = 113)

| **Reference** | **Reason for Exclusion** |
| --- | --- |
| Albert NM, Moser DK, Nutter B, Pozuelo L. Are PHQ-9 and PHQ-2 Depression score cutoffs the best cutoffs for determining significant depression in Pts with HF and Mild-Moderate Symptoms? J Car Fail. 2009;15(6):S114-S114. | Major depression not assessed |
| Allgaier AK, Pietsch K, Fruhe B, Prast E, Sigl-Glöckner J, Schulte-Körne G. Depression in pediatric care: Is the WHO-Five Well-Being Index a valid screening instrument for children and adolescents? Gen Hosp Psychiatry. 2012;34:234-241. | PHQ not administered |
| Armstrong G, Nuken A, Samson L, Singh S, Jorm AF, Kermode M. Quality of life, depression, anxiety and suicidal ideation among men who inject drugs in Delhi, India. BMC Psychiatry. 2013;13(3):151-151. | Major depression not assessed |
| Arroll B, Goodyear-Smith F, Kerse N, Hwang M, Crengle S, Gunn J, et al. The prevalence of depression among Maori patients in Auckland general practice. JPHC. 2009;1(1):26-29. | Major depression not assessed |
| Berghofer A, Hartwich A, Bauer M, Unützer J, Willich SN, Pfennig A. Efficacy of a systematic depression management program in high utilizers of primary care: a randomized trial. BMC Health Serv Res. 2012;12(1):298. | Sample selected for known distress, mental health diagnosis, or psychiatric setting |
| Buehler B, Kocalevent R, Berger R, Mahler A, Preiß B, Liwowsky I, et al. Treatment situation of long-term unemployed with psychological disorders. Nervenarzt. 2013;84(5):603-607. | Sample selected for known distress, mental health diagnosis, or psychiatric setting |
| Cannon DS, Tiffany ST, Coon H, Scholand MB, McMahon WM, Leppert MF. The PHQ-9 as a brief assessment of lifetime major depression. Psychol Assess. 2007;19(2):247-251. | Major depression not assessed |
| Carballeira Y, Dumont P, Borgacci S, Rentsch D, de Tonnac N, Archinard M, et al. Criterion validity of the French version of Patient Health Questionnaire (PHQ) in a hospital department of internal medicine. Psychol Psychother-T. 2007;80(1):69-77. | No validated interview to assess major depression |
| Cassin S, Sockalingam S, Hawa R, Wnuk S, Royal S, Taube-Schiff M, et al. Psychometric properties of the Patient Health Questionnaire (PHQ-9) as a depression screening tool for bariatric surgery candidates. Psychosomatics. 2013;54(4):352-358. | > 2 weeks between PHQ and diagnostic interview |
| Chen S, Chiu H, Xu B, Ma Y, Jin T, Wu M, et al. Reliability and validity of the PHQ-9 for screening late-life depression in Chinese primary care. Int J Geriatr Psychiatry. 2010;25(11):1127-1133. | > 2 weeks between PHQ and diagnostic interview |
| Choi Y, Mayer TG, Williams MJ, Gatchel RJ. What is the best screening test for depression in chronic spinal pain patients? Spine J. 2014;14(7):1175-1182. | > 2 weeks between PHQ and diagnostic interview |
| Corapcioglu A, Ozer GU. Adaptation of revised Brief PHQ (Brief-PHQ-r) for diagnosis of depression, panic disorder and somatoform disorder in primary healthcare settings. Int J Psychiatry Clin Pract 2004;8(1):11-18. | No validated interview to assess major depression |
| Creed F. The relationship between somatic symptoms, health anxiety, and outcome in medical out-patients. Psychiatr Clin North Am. 2011;34(3):545-564. | PHQ not administered |
| Davis K, Pearlstein T, Stuart S, O'Hara M, Zlotnick C. Analysis of brief screening tools for the detection of postpartum depression: comparisons of the PRAMS 6-item instrument, PHQ-9, and structured interviews. Arch Womens Ment Health. 2013;16(4):271-277. | Sample selected for known distress, mental health diagnosis, or psychiatric setting |
| de Man-van Ginkel J, Floor G, Marieke S, Eline L, Thora H. Early detection of post stroke depression: a clinimetric evaluation of the PHQ-9. J Clin Nurs. 2010;19:88-88. | Major depression not assessed |
| Diez-Quevedo C, Rangil T, Sanchez-Planell L, Kroenke K, Spitzer RL. Validation and utility of the Patient Health Questionnaire in diagnosing mental disorders in 1003 general hospital Spanish inpatients. Psychosom Med. 2001;63(4):679-686. | No validated interview to assess major depression |
| Esler D, Johnston F, Thomas D, Davis B. The validity of a depression screening tool modified for use with Aboriginal and Torres Strait Islander people. Aust N Z J Public Health2008;32(4):317-321. | No validated interview to assess major depression |
| Fine TH, Contractor AA, Tamburrino M, Elhai JD, Prescott MR, Cohen GH, et al. Validation of the telephone-administered PHQ-9 against the in-person administered SCID-I major depression module. J Affect Disord. 2013;150(3):1001-1007. | PHQ not administered |
| Galek A, Erbsloeh-Moeller B, Koellner V, Kühn-Becker H, Langhorst J, Petermann F, et al. Mental disorders in patients with fibromyalgia syndrome. Screening in centres of different medical specialties. Schmerz. 2013;27:296-304. | Major depression not assessed |
| Gawlik S, Waldeier L, Mueller M, Szabo A, Sohn C, Reck C. Subclinical depressive symptoms during pregnancy and birth outcome-a pilot study in a healthy German sample. Arch Womens Ment Health. 2013;16(2):93-100. | Sample selected for known distress, mental health diagnosis, or psychiatric setting |
| Gellis ZD. Depression screening in medically ill homecare elderly. Best Pract Ment Health. 2010;6(1):1-16. | PHQ not administered |
| Gibbons RD, Hooker G, Finkelman MD, Weiss DJ, Pilkonis PA, Frank E, et al. The computerized adaptive diagnostic test for major depressive disorder (CAD-MDD): a screening tool for depression. J Clin Psychiatry. 2013;74(7):669-674. | Sample selected for known distress, mental health diagnosis, or psychiatric setting |
| Gibbons RD, Weiss DJ, Pilkonis PA, Frank E, Moore T, Kim JB, et al. Development of a computerized adaptive test for depression. Arch. Gen. Psychiatry. 2012;69:1104-1112. | Sample selected for known distress, mental health diagnosis, or psychiatric setting |
| Gigantesco A, Mirante N, Granchelli C, Diodati G, Cofini V, Mancini C, et al. Psychopathological chronic sequelae of the 2009 earthquake in L'Aquila, Italy. J Affect Disord. 2013;148(2-3):265-271. | Major depression not assessed |
| Gilbody S, Richards D, Barkham M. Diagnosing depression in primary care using self-completed instruments: UK validation of PHQ-9 and CORE-OM. Br J Gen Pract. 2007;57(541):650-652. | Sample selected for known distress, mental health diagnosis, or psychiatric setting |
| Gold KJ, Spangenberg K, Wobil P, Schwenk TL. Depression and risk factors for depression among mothers of sick infants in Kumasi, Ghana. BJOG. 2013;120(3):228-231. | Major depression not assessed |
| Gothwal VK, Bagga DK, Bharani S, Sumalini R, Reddy SP. The Patient Health Questionnaire-9: Validation among patients with glaucoma. PLoS ONE. 2014;9(7):Art e101295-8. | Major depression not assessed |
| Grote NK, Katon WJ, Lohr MJ, Carson K, Curran M, Galvin E, et al. Culturally relevant treatment services for perinatal depression in socio-economically disadvantaged women: The design of the MOMCare study. Contemp Clin Trials. 2014;39(1):34-49. | Sample selected for known distress, mental health diagnosis, or psychiatric setting |
| Hanwella R, Ekanayake S, de Silva VA. The validity and reliability of the Sinhala translation of the Patient Health Questionnaire (PHQ-9) and PHQ-2 screener. Depress Res Treat. 2014;2014:768978. | Sample selected for known distress, mental health diagnosis, or psychiatric setting |
| Hauffa R, Rief W, Brahler E, Martin A, Mewes R, Glaesmer H. Lifetime traumatic experiences and posttraumatic stress disorder in the German population: results of a representative population survey. J Nerv Ment Dis. 2011;199(12):934-939. | Major depression not assessed |
| Hauser W, Glaesmer H, Schmutzer G, Brahler E. Widespread pain in older Germans is associated with posttraumatic stress disorder and lifetime employment status--results of a cross-sectional survey with a representative population sample. Pain. 2012;153(12):2466-2472. | Major depression not assessed |
| Hausteiner-Wiehle C, Sokollu F. Magical thinking in somatoform disorders: an exploratory study among patients with suspected allergies. Psychopathology. 2011;44(5):283-288. | Major depression not assessed |
| Holzapfel N, Muller-Tasch T, Wild B, Jünger J, Zugck C, Remppis A, et al. Depression profile in patients with and without chronic heart failure. J Affect Disord. 2008;105(1-3):53-62. | Major depression not assessed |
| Howell EA, Bodnar-Deren S, Balbierz A, Loudon H, Mora PA, Zlotnick C, et al. An intervention to reduce postpartum depressive symptoms: A randomized controlled trial. Arch Womens Ment Health. 2014;17(1):57-63. | Major depression not assessed |
| Husain N, Creed F, Tomenson B. Depression and social stress in Pakistan. Psychol Med. 2000;30(2):395-402. | PHQ not administered |
| Husain N, Gater R, Tomenson B, Creed F. Comparison of the Personal Health Questionnaire and the Self Reporting Questionnaire in rural Pakistan. J Pak Med Assoc. 2006;56(8):366-370. | PHQ not administered |
| Husain N, Waheed W, Tomenson B, Creed F. The validation of personal health questionnaire amongst people of Pakistani family origin living in the United Kingdom. J Affect Disord. 2007;97(1-3):261-264. | PHQ not administered |
| Inoue T, Tanaka T, Nakagawa S. Utility and limitations of PHQ-9 in a clinic specializing in psychiatric care. BMC Psychiatry. 2012;12(1):73. | No validated interview to assess major depression |
| Jacobs SR, Jacobsen PB, Donovan K, Booth-Jones M. Utility of the Patient Health Questionnaire-9 (Phq-9) in identifying depression among hematopoietic stem cell transplant (HSCT) patients. Ann Behav Med. 2007;33:S56-S56. | Major depression not assessed |
| Jeon HJ, Park JH, Shim EJ. Permissive attitude toward suicide and future intent in individuals with and without depression: results from a nationwide survey in Korea. J Nerv Ment Dis. 2013;201(4):286-291. | Major depression not assessed |
| Kamphuis MH, Stegenga BT, Zuithoff NP, King M, Nazareth I, de Wit NJ, et al. Does recognition of depression in primary care affect outcome? The PREDICT-NL study. Fam Pract. 2012;29(1):16-23. | Major depression not assessed |
| Karekla M, Pilipenko N, Feldman J. Greek language validation of the Patient Health Questionnaire (PHQ). Ann Behav Med. 2011;41:S20-S20. | Major depression not assessed |
| Kissane DW, Wein S, Love A, Lee XQ. The Demoralization Scale: a report of its development and preliminary validation. J Palliat Med. 2004;20(4):269-276. | Major depression not assessed |
| Krause S, Rydall A, Hales S, Rodin G, Lo C. Initial validation of the Death and Dying Distress Scale for the assessment of death anxiety in patients with advanced cancer. J Pain Symptom Manage. 2015;49(1):127-135. | Sample selected for known distress, mental health diagnosis, or psychiatric setting |
| Kroenke K, Spitzer RL, Williams JB. The Patient Health Questionnaire-2: validity of a two-item depression screener. Med Care. 2003;41:1284-1292. | No validated interview to assess major depression |
| Kroenke K, Spitzer RL, Williams JB. The PHQ-9: validity of a brief depression severity measure. J Gen Intern Med. 2001;16(9):606-613. | No validated interview to assess major depression |
| Lewis BA, Gjerdingen DK, Avery MD, Guo H, Sirard JR, Bonikowske AR, et al. Examination of a telephone-based exercise intervention for the prevention of postpartum depression: design, methodology, and baseline data from The Healthy Mom study. Contemp Clin Trials. 2012;33(6):1150-1158. | Sample selected for known distress, mental health diagnosis, or psychiatric setting |
| Lewis BA, Gjerdingen DK, Avery MD, Sirard JR, Guo H, Schuver K, et al. A randomized trial examining a physical activity intervention for the prevention of postpartum depression: The healthy mom trial. Ment Health Phys Act. 2014;7(1):42-49. | Sample selected for known distress, mental health diagnosis, or psychiatric setting |
| Li C, Friedman B, Conwell Y, Fiscella K. Validity of the Patient Health Questionnaire 2 (PHQ-2) in identifying major depression in older people. J Am Geriatr Soc. 2007;55(4):596-602. | Major depression not assessed |
| Lino VT, Portela MC, Camacho LA, Atie S, Lima MJ, Rodrigues NC, et al. Screening for depression in low-income elderly patients at the primary care level: use of the Patient Health Questionnaire-2. PLoS One. 2014;9(12):e113778-e113778. | Study only administered the PHQ-2 |
| Liu LT, Chen SL, Jin T, Li L, Fan HN, Yu XE, et al. Natural outcome and risk-prediction model of late-life depression. Zhejiang Da Xue Xue Bao Yi Xue Ban. 2012;41(6):653-658. | > 2 weeks between PHQ and diagnostic interview |
| Londono A, Romero P, Casas G. The association between armed conflict, violence and mental health: a cross sectional study comparing two populations in Cundinamarca department, Colombia. Confl Health. 2012;6(1):12. | Major depression not assessed |
| Lossnitzer N, Muller-Tasch T, Lowe B, Zugck C, Nelles M, Remppis A, et al. Exploring potential associations of suicidal ideation and ideas of self-harm in patients with congestive heart failure. Depress Anxiety. 2009;26(8):764-768. | Sample selected for known distress, mental health diagnosis, or psychiatric setting |
| Lowe B, Grafe K, Kroenke K, Zipfel S, Quenter A, Wild B, et al. Predictors of psychiatric comorbidity in medical outpatients. Psychosom Med. 2003;65(5):764-770. | PHQ not administered |
| Lowe B, Grafe K, Quenter A, Buchholz C, Wild B, Zipfel S, et al. The Patient Health Questionnaire D as a self-rating instrument for screening mental disorders in internal medicine and in general medicine - Preliminary validation results with 1000 outpatients. Psychother Psychosom Med Psychol. 2001;51:109-109. | No original data |
| Lowe B, Grafe K, Zipfel S, Spitzer RL, Herrmann-Lingen C, Witte S, et al. Detecting panic disorder in medical and psychosomatic outpatients: comparative validation of the Hospital Anxiety and Depression Scale, the Patient Health Questionnaire, a screening question, and physicians' diagnosis. J Psychosom Res. 2003;55(6):515-519. | PHQ not administered |
| Lowe B, Kroenke K, Spitzer RL, Williams JB, Mussell M, Wingenfeld K, et al. Trauma exposure and posttraumatic stress disorder in primary care patients: cross-sectional criterion standard study. J Clin Psychiatry. 2011;72:304-312. | Major depression not assessed |
| Mahajan S, Avasthi A, Grover S, Chawla YK. Role of baseline depressive symptoms in the development of depressive episode in patients receiving antiviral therapy for hepatitis C infection. J Psychosom Res. 2014;77(2):109-115. | Sample selected for known distress, mental health diagnosis, or psychiatric setting |
| Maneeton B, Maneeton N, Mahathep P. Prevalence of depression and its correlations: a cross-sectional study in Thai cancer patients. Asian Pac J Cancer Prev. 2012;13(5):2039-2043. | Major depression not assessed |
| Mao HJ, Li HJ, Chiu H, Chan WC, Chen SL. Effectiveness of antenatal emotional self-management training program in prevention of postnatal depression in Chinese women. Perspect Psychiatr Care. 2012;48(4):218-224. | Sample selected for known distress, mental health diagnosis, or psychiatric setting |
| Margrove K, Mensah S, Thapar A, Kerr M. Depression screening for patients with epilepsy in a primary care setting using the Patient Health Questionnaire-2 and the Neurological Disorders Depression Inventory for Epilepsy. Epilepsy Behav. 2011;21(4):387-390. | Study only administered the PHQ-2 |
| Mautner E, Ashida C, Greimel E, Lang U, Kolman C, Alton D, et al. Are there differences in the health outcomes of mothers in Europe and East-Asia? A cross-cultural health Survey. Biomed Research International. 2014;856543-856543. | Major depression not assessed |
| Mitchell AJ, McGlinchey JB, Young D, Chelminski I, Zimmerman M. Accuracy of specific symptoms in the diagnosis of major depressive disorder in psychiatric out-patients: data from the MIDAS project. Psychol Med. 2009;39(7):1107-1116. | PHQ not administered |
| Mittal D, Fortney JC, Pyne JM, Wetherell JL. Predictors of persistence of comorbid generalized anxiety disorder among veterans with major depressive disorder. J Clin Psychiatry. 2011;72(11):1445-1451. | Sample selected for known distress, mental health diagnosis, or psychiatric setting |
| Morina N, von Lersner U, Prigerson HG. War and bereavement: consequences for mental and physical distress. PLoS ONE. 2011;6(7):e22140. | PHQ not administered |
| Muller KW, Beutel ME, Wolfling K. A contribution to the clinical characterization of Internet addiction in a sample of treatment seekers: validity of assessment, severity of psychopathology and type of co-morbidity. Compr Psychiatry. 2014;55(4):770-777. | Major depression not assessed |
| Mulligan L, Fear NT, Jones N, Alvarez H, Hull L, Naumann U, et al. Postdeployment Battlemind training for the U.K. armed forces: A cluster randomized controlled trial. J Consult Clin Psychol. 2012;80(3):331-341. | Major depression not assessed |
| Mussell M, Kroenke K, Spitzer RL, Williams JB, Herzog W, Löwe B. Gastrointestinal symptoms in primary care: prevalence and association with depression and anxiety. J Psychosom Res. 2008;64(6):605-612. | Major depression not assessed |
| Olariu E, Castro-Rodriguez JI, Alvarez P, Garnier C, Reinoso M, Martín-López LM, et al. Validation of clinical symptom irt scores for diagnosis and severity assessment of common mental disorders. Qual Life Res. 2014. | Sample selected for known distress, mental health diagnosis, or psychiatric setting |
| Orive M, Padierna JA, Quintana JM, Las-Hayas C, Vrotsou K, Aguirre U. Detecting depression in medically ill patients: Comparative accuracy of four screening questionnaires and physicians' diagnoses in Spanish population. J Psychosom Res. 2010;69(4):399-406. | No validated interview to assess major depression |
| Osorio FL, de Carvalho AC, Crippa JA, Loureiro SR. Screening for smoking in a general hospital: scale validation, indicators of prevalence, and comorbidity. Perspect Psychiatr Care. 2013;49(1):5-12. | Major depression not assessed |
| Park H, Kim J, Hahm B. The Distress Thermometer and the PHQ-2 for ultra-brief screening depression of cancer patients In Korea. Psychooncology. 2013;22:303-304. | Study only administered the PHQ-2 |
| Pibernik-Okanovic M, Grgurevic M, Ajdukovic D, Novak B, Begic D, Metelko Z. Screening performance of a short versus long version of the Patient Health Questionnaire-depression in outpatients with diabetes. Diabetologia. 2009;52:S392-S393. | Sample selected for known distress, mental health diagnosis, or psychiatric setting |
| Pilipenko N, Karekla M, Feldman J. Validation of Patient Health Questionnaire in Greek-language sample. Eur. Psychiatry. 2011;26:473. | Major depression not assessed |
| Poutanen O, Koivisto AM, Salokangas RK. Applicability of the DEPS Depression Scale: assessing format and individual items in subgroups of patients. Nord J Psychiatry. 2010;64(6):384-390. | Major depression not assessed |
| Prescott MR, Tamburrino M, Calabrese JR, Liberzon I, Slembarski R, Shirley E, et al. Validation of lay-administered mental health assessments in a large Army National Guard cohort. Int J Methods Psychiatr Res. 2014;23(1):109-119. | > 2 weeks between PHQ and diagnostic interview |
| Priyanka P, Boyle LL, Tu XM, Conwell Y. Inter-rater reliability and validity of the PHQ-9 and GAD-7 to identify depression and anxiety in older adults receiving aging services care management. Am J Geriatr Psychiatry. 2010;18(3):S113-S114. | No original data |
| Reck C, Stehle E, Reinig K, Mundt C. Maternity blues as a predictor of DSM-IV depression and anxiety disorders in the first three months postpartum. J Affect Disord. 2009;113(1-2):77-87. | Sample selected for known distress, mental health diagnosis, or psychiatric setting |
| Rentsch D, Dumont P, Borgacci S, Carballeira Y, Archinard M, Andreoli A. Prevalence and treatment of depression in a hospital department of internal medicine. Gen Hosp Psychiatry. 2007;29(1):25-31. | No validated interview to assess major depression |
| Rief W, Mewes R, Martin A, Glaesmer H, Braehler E. Are psychological features useful in classifying patients with somatic symptoms? Psychosom Med. 2010;72(7):648-655. | > 2 weeks between PHQ and diagnostic interview |
| Ringoir L, Pedersen SS, Widdershoven JW, Pop VJ. Prevalence of psychological distress in elderly hypertension patients in primary care. Neth Heart J. 2014;22(2):71-76. | Major depression not assessed |
| Rizzo R, Piccinelli M, Mazzi MA, Bellantuono C, Tansella M. The Personal Health Questionnaire: a new screening instrument for detection of ICD-10 depressive disorders in primary care. Psychol Med. 2000;30(4):831-840. | PHQ not administered |
| Ryan DA, Gallagher P, Wright S, Cassidy EM. Sensitivity and specificity of the Distress Thermometer and a two-item depression screen (Patient Health Questionnaire-2) with a 'help' question for psychological distress and psychiatric morbidity in patients with advanced cancer. Psychooncology. 2012;21(12):1275-1284. | PHQ not administered |
| Saliba D, DiFilippo S, Edelen MO, Kroenke K, Buchanan J, Streim J. Testing the PHQ-9 interview and observational versions (PHQ-9 OV) for MDS 3.0. J Am Med Dir Assoc. 2012;13(7):618-625. | PHQ not administered |
| Salve H, Goswami K, Nongkynrih B, Sagar R, Sreenivas V. Prevalence of psychiatric morbidity at Mobile Health Clinic in an urban community in North India. Gen Hosp Psychiatry. 2012;34(2):121-126. | PHQ not administered |
| Sayers SL, Farrow VA, Ross J, Oslin DW. Family problems among recently returned military veterans referred for a mental health evaluation. J Clin Psychiatry. 2009;70(2):163-170. | Sample selected for known distress, mental health diagnosis, or psychiatric setting |
| Schmitz-Hubsch T, Coudert M, Tezenas du Montcel S, Giunti P, Labrum R, Dürr A, et al. Depression comorbidity in spinocerebellar ataxia. Mov Disord. 2011;26(5):870-876. | Major depression not assessed |
| Shen Q, Bergquist-Beringer S. Relationship between major depression and insulin resistance: Does it vary by gender or race/ethnicity among young adults aged 20-39 years? J Diabetes. 2013;5(4):471-481. | Major depression not assessed |
| Shoukri MM, Donner A. Bivariate modeling of interobserver agreement coefficients. Stat Med. 2009;28(3):430-440. | No original data |
| Smith AB, Rush R, Wright P, Stark D, Velikova G, Sharpe M. Validation of an item bank for detecting and assessing psychological distress in cancer patients. Psychooncology. 2009;18(2):195-199. | Sample selected for known distress, mental health diagnosis, or psychiatric setting |
| Smith GC, McAsey P, Trauer T. Screening and monitoring in renal dialysis and transplant patients using the SF36 and Patient Health Questionnaire. Aust N Z J Psychiatry. 2000;34(suppl 1):A62-A62. | Major depression not assessed |
| Smith GC, McAsey P, Trauer T. Screening and monitoring in renal analysis and transplant patients using the SF36 and Patient Health Questionnaire. Psychosomatics. 2001;42(2):182-183. | Major depression not assessed |
| Smith GC, Trauer T, Kerr PG, Chadban SJ. Prospective psychosocial monitoring of living kidney donors using the Short Form-36 Health Survey: Results at 12 months. Transplantation. 2004;78(9):1384-1389. | No validated interview to assess major depression |
| Smith MV, Gotman N, Lin H, Yonkers KA. Do the PHQ-8 and the PHQ-2 accurately screen for depressive disorders in a sample of pregnant women? Gen Hosp Psychiatry. 2010;32(5):544-548. | Study only administered the PHQ-8 |
| Sockalingam S, Blank D, Al Jarad A, Alosaimi F, Hirschfield G, Abbey SE. A comparison of depression screening instruments in hepatitis C and the impact of depression on somatic symptoms. Psychosomatics. 2011;52(5):433-440. | Sample selected for known distress, mental health diagnosis, or psychiatric setting |
| Stegenga BT, Kamphuis MH, King M, Nazareth I, Geerlings MI. The natural course and outcome of major depressive disorder in primary care: the PREDICT-NL study. Soc Psychiatry Psychiatr Epidemiol. 2012;47(1):87-95. | Major depression not assessed |
| Subramanian U, Perkins SM, Kim J, Ding Y, Pressler SJ. Depressive symptoms in heart failure: Validity and reliability of the PHQ-8. J Gen Intern Med. 2008;23:276-276. | Major depression not assessed |
| Suzuki T, Shiga T, Nishimura K, Ishigooka J, Hagiwara N. PHQ-9 screening for depression in hospitalized patients with heart failure. Eur J Heart Fail. 2013;S242-S242. | Major depression not assessed |
| Tabb KM, Gavin AR, Guo Y, Huang H, Debiec K, Katon W. Views and experiences of suicidal ideation during pregnancy and the postpartum: findings from interviews with maternal care clinic patients. Women Health. 2013;53(5):519-535. | Major depression not assessed |
| Tavakkoli M, Ferrando SJ, Rabkin J, Marks K, Talal AH. Depression and fatigue in chronic hepatitis C patients with and without HIV co-infection. Psychosomatics. 2013;54(5):466-471. | No validated interview to assess major depression |
| Thapar A, Hammerton G, Collishaw S, Potter R, Rice F, Harold G, et al. Detecting recurrent major depressive disorder within primary care rapidly and reliably using short questionnaire measures. Br J Gen Pract. 2014;64(618):e31-7. | Sample selected for known distress, mental health diagnosis, or psychiatric setting |
| Thekkumpurath P, Walker J, Butcher I, Hodges L, Kleiboer A, O’connor M, et al. Screening for major depression in cancer outpatients: the diagnostic accuracy of the 9-item Patient Health Questionnaire. Cancer. 2011;117(1):218-227. | Sample selected for known distress, mental health diagnosis, or psychiatric setting |
| Tilli V, Suominen K, Karlsson H. The Autonomic Nervous System Questionnaire and the Brief Patient Health Questionnaire as screening instruments for panic disorder in Finnish primary care. Eur. Psychiatry. 2013;28(7):442-447. | PHQ not administered |
| Tschudi-Madsen H, Kjeldsberg M, Natvig B, Ihlebaek C, Dalen I, Straand J, et al. Multiple symptoms and medically unexplained symptoms-Closely related concepts in general practitioners' evaluations. A linked doctor-patient study. J Psychosom Res. 2013;74(3):186-190. | PHQ not administered |
| Uebelacker LA, German NM, Gaudiano BA, Miller IW. Patient Health Questionnaire depression scale as a suicide screening instrument in depressed primary care patients: a cross-sectional study. Prim Care Companion CNS Disord. 2011;13(1). | Sample selected for known distress, mental health diagnosis, or psychiatric setting |
| Ulhaq S, Symeon C, Agius M. Use of the PHQ-9 as a screening tool for post-stroke depression. Eur. Psychiatry. 2010;25:502. | Major depression not assessed |
| Vera M, Reyes-Rabanillo ML, Huertas S, Juarbe D, Pérez-Pedrogo C, Huertas A, et al. Suicide ideation, plans, and attempts among general practice patients with chronic health conditions in Puerto Rico. Int J Gen Med. 2011;4:197-205. | Sample selected for known distress, mental health diagnosis, or psychiatric setting |
| Watson LC, Zimmerman S, Cohen LW, Dominik R. Practical depression screening in residential care/assisted living: five methods compared with gold standard diagnoses. Am J Geriatr Psychiatry. 2009;17(7):556-564. | PHQ not administered |
| Whitlow NR, Ryan GL, Stuart SP. The Patient Health Questionnaire (PHQ) is a poor psychological screening tool in in vitro fertilization (IVF) Patients. Fertil Steril. 2011;96(3):S11-S11. | Major depression not assessed |
| Williams LS, Brizendine EJ, Plue L, Tu W, Hendrie H, Kroenke K. Performance of the PHQ-9 as a screening tool for depression after stroke. Stroke. 2005;36(3):635-638. | Sample selected for known distress, mental health diagnosis, or psychiatric setting |
| Yeung A, Fung F, Yu SC, Vorono S, Ly M, Wu S, et al. Validation of the Patient Health Questionnaire-9 for depression screening among Chinese Americans. Compr Psychiatry. 2008;49(2):211-217. | > 2 weeks between PHQ and diagnostic interview |
| Yeung A, Yu SC, Fung F, Vorono S, Fava M. Recognizing and engaging depressed Chinese Americans in treatment in a primary care setting. Int J Geriatr Psychiatry. 2006;21(9):819-823. | Sample selected for known distress, mental health diagnosis, or psychiatric setting |
| Zuithoff NP, Vergouwe Y, King M, Nazareth I, van Wezep MJ, Moons KG, et al. The Patient Health Questionnaire-9 for detection of major depressive disorder in primary care: consequences of current thresholds in a crosssectional study. BMC Fam Pract. 2010;11(1):98. | Major depression not assessed |

**Supplementary Table 2a.** Characteristics of included primary studies

| **First Author, Year** | **Country** | **Recruited Population** | **Diagnostic Interview** | **Classification System** | **Total N** | **Major Depression**  **N (%)** |
| --- | --- | --- | --- | --- | --- | --- |
| **Semi-structured Interviews** | | | | | | |
| **Amoozegar, 20171** | Canada | Migraine patients | SCID | DSM-IV | 203 | 49 (24) |
| **Ayalon, 2010**2 | Israel | Elderly primary care patients | SCID | DSM-IV | 151 | 6 (4) |
| **Beraldi, 2014**3 | Germany | Cancer inpatients | SCID | DSM-IV | 116 | 7 (6) |
| **Bombardier, 2012**4 | USA | Inpatients with spinal cord injuries | SCID | DSM-IV | 160 | 14 (9) |
| **Chagas, 2013**5 | Brazil | Outpatients with Parkinson's Disease | SCID | DSM-IV | 84 | 19 (23) |
| **Eack, 2006**6 | USA | Women seeking psychiatric services for their children at two mental health centers | SCID | DSM-IV | 48 | 12 (25) |
| **Fiest, 2014**7 | Canada | Epilepsy outpatients | SCID | DSM-IV | 168 | 23 (14) |
| **Fischer, 2014**8 | Germany | Heart failure patients | SCID | DSM-IV | 192 | 10 (5) |
| **Gjerdingen, 2009**9 | USA | Mothers registering their newborns for well-child visits at medical or pediatric clinics | SCID | DSM-IV | 417 | 19 (5) |
| **Gräfe, 2004**10 | Germany | Medical and psychosomatic outpatients | SCID | DSM-IV | 473 | 66 (14) |
| **Khamseh, 2011**11 | Iran | Type 2 diabetes patients | SCID | DSM-IV | 183 | 78 (43) |
| **Kwan, 2012**12 | Singapore | Post-stroke inpatients undergoing rehabilitation | SCID | DSM-IV-TR | 113 | 3 (3) |
| **Lambert, 2015**13 | Australia | Cancer patients | SCID | DSM-IV | 147 | 21 (14) |
| **Liu, 2011**14 | Taiwan | Primary care patients | SCAN | DSM-IV | 1532 | 50 (3) |
| **McGuire, 2013**15 | USA | Acute coronary syndrome inpatients | DISH | DSM-IV | 100 | 9 (9) |
| **Osório, 2009**16 | Brazil | Women in primary care | SCID | DSM-IV | 177 | 60 (34) |
| **Osório, 2012**17 | Brazil | Inpatients from various clinical wards | SCID | DSM-IV | 86 | 28 (33) |
| **Picardi, 2005**18 | Italy | Inpatients with skin diseases | SCID | DSM-IV | 138 | 12 (9) |
| **Richardson, 2010**19 | USA | Older adults undergoing in-home aging services care management assessment | SCID | DSM-IV | 377 | 95 (25) |
| **Rooney, 2013**20 | UK | Adults with cerebral glioma | SCID | DSM-IV | 126 | 14 (11) |
| **Sidebottom, 20122**1 | USA | Pregnant women | SCID | DSM-IV | 242 | 12 (5) |
| **Simning, 2012**22 | USA | Older adults living in public housing | SCID | DSM-IV | 190 | 10 (5) |
| **Turner, Unpublished** | Australia | Cardiac rehabilitation patients | SCID | DSM-IV | 51 | 4 (8) |
| **Turner, 2012**23 | Australia | Stroke patients | SCID | DSM-IV | 72 | 13 (18) |
| **Twist, 2013**24 | UK | Type 2 diabetes outpatients | SCAN | DSM-IV | 360 | 80 (22) |
| **Williams, 2012**25 | USA | Parkinson’s Disease patients | SCID | DSM-IV | 235 | 61 (26) |
| **Wittkampf, 2009**26 | The Netherlands | Primary care patients at risk for depression | SCID | DSM-IV | 260 | 45 (17) |
| **Fully Structured Interviews** | | | | | | |
| **Arroll, 2010**27 | New Zealand | Primary care patients | CIDI | DSM-IV | 2523 | 156 (6) |
| **Azah, 2005**28 | Malaysia | Adults attending family medicine clinics | CIDI | ICD-10 | 180 | 30 (17) |
| **de Man-van Ginkel, 2012**29 | The Netherlands | Stroke patients | CIDI | DSM-IV | 164 | 17 (10) |
| **Gelaye, 2014**30 | Ethiopia | Outpatients at a general hospital | CIDI | DSM-IV | 923 | 162 (18) |
| **Hahn, 2006**31 | Germany | Patients with chronic illnesses from rehabilitation centers | CIDI | DSM-IV | 208 | 17 (8) |
| **Henkel, 2004**32 | Germany | Primary care patients | CIDI | ICD-10 | 430 | 43 (10) |
| **Hobfoll, 2011**33 | Israel | Jewish and Palestinian residents of Jerusalem exposed to war | CIDI | DSM-IV | 141 | 41 (29) |
| **Kiely, 2014**34 | Australia | Community sample of adults | CIDI | ICD-10 | 822 | 33 (4) |
| **Mohd Sidik, 2012**35 | Malaysia | Primary care patients | CIDI | DSM-IV | 146 | 31 (21) |
| **Patel, 2008**36 | India | Primary care patients | CIS-R | ICD-10 | 299 | 13 (4) |
| **Pence, 2012**37 | Cameroon | HIV-infected patients | CIDI | DSM-IV | 392 | 11 (3) |
| **Razykov, 2013**38 | Canada | Patients with systemic sclerosis | CIDI | DSM-IV | 343 | 13 (4) |
| **Thombs, 2008**39 | USA | Outpatients with coronary artery disease | C-DIS | DSM-IV | 1006 | 221 (22) |
| **Mini International Neuropsychiatric Interviews (MINI)** | | | | | | |
| **Akena, 2013**40 | Uganda | HIV/AIDS patients | MINI | DSM-IV | 91 | 11 (12) |
| **Cholera, 2014**41 | South Africa | Patients undergoing routine HIV counseling and testing at a primary health care clinic | MINI | DSM-IV | 395 | 47 (12) |
| **Hides, 2007**42 | Australia | Injection drug users accessing a needle and syringe program | MINI | DSM-IV | 103 | 47 (46) |
| **Hyphantis, 2011**43 | Greece | Patients with various rheumatologic disorders | MINI | DSM-IV | 213 | 69 (32) |
| **Hyphantis, 2014**44 | Greece | Patients with chronic illnesses presenting at the emergency department | MINI | DSM-IV | 349 | 95 (27) |
| **Inagaki, 2013**45 | Japan | Internal medicine outpatients | MINI | DSM-III-R | 104 | 21 (20) |
| **Lamers, 2008**46 | The Netherlands | Elderly primary care patients with diabetes mellitus or chronic obstructive pulmonary disease | MINI | DSM-IV | 104 | 59 (57) |
| **Lotrakul, 2008**47 | Thailand | Outpatients | MINI | DSM-IV | 278 | 19 (7) |
| **Muramatsu, 2007**48 | Japan | Primary care patients | MINI | DSM-IV | 114 | 31 (27) |
| **Persoons, 2001**49 | Belgium | Inpatients and patients at gastroenterological and hepatology wards | MINI | DSM-IV | 173 | 28 (16) |
| **Santos, 2013**50 | Brazil | General population | MINI | DSM-IV | 196 | 25 (13) |
| **Stafford, 2007**51 | Australia | Inpatients with coronary artery disease who had undergone surgery | MINI | DSM-IV | 193 | 35 (18) |
| **Sung, 2013**52 | Singapore | Primary care patients | MINI | DSM-IV | 399 | 12 (3) |
| **Zhang, 2013**53 | China | Type 2 diabetes patients | MINI | DSM-IV | 68 | 17 (25) |

aWas unpublished at the time of electronic database search

**Abbreviations**: C-DIS: Computerized Diagnostic Interview Schedule; CIDI: Composite International Diagnostic Interview; CIS-R: Clinical Interview Schedule Revised; DISH: Depression Interview and Structured Hamilton; DSM: Diagnostic and Statistical Manual of Mental Disorders; ICD: International Classification of Diseases; MINI: Mini Neurospsychiatric Diagnostic Interview; PHQ-9: Patient Health Questionnaire-9; SCAN: Schedules for Clinical Assessment in Neuropsychiatry; SCID: Structured Clinical Interview for DSM Disorders; UK: United Kingdom; USA: United States of America.

**Supplementary Table 2b**. Characteristics of eligible primary studies that did not contribute data for the present study

| **First Author, Year** | **Country** | **Recruited Population** | **Diagnostic Interview** | **Classification System** | **Total N** | **Major Depression**  **N (%)** |
| --- | --- | --- | --- | --- | --- | --- |
| **Semi-structured Interviews** | | | | | | | |
| **Becker, 2002**54 | Saudi Arabia | Primary care patients | SCID | DSM-III-R | 173 | NRa |
| **Chen, 2013**55 | China | Primary care populations | SCID | DSM-IV | 280 | NRa |
| **Chen, 2012**56 | China | Adults over 60 in primary care | SCID | DSM-IV | 262 | 97 (37) |
| **Fann, 2005**57 | USA | Inpatients with traumatic brain injury | SCID | DSM-IV | 134 | 45 (34) |
| **Lai, 2010**58 | Hong Kong | Men with postpartum wives | SCID | DSM-IV | 551 | 8 (1) |
| **Navinés, 2012**59 | Spain | Chronic hepatitis C patients | SCID | DSM-IV | 104 | 21 (20) |
| **Phelan, 2010**60 | USA | Elderly primary care patients | SCID | DSM-IV | 69 | 8 (12) |
| **Thompson, 2011**61 | USA | Parkinson's patients | SCID | DSM-IV | 214 | 30 (14) |
| **Vöhringer, 2013**62 | Chile | Primary care patients | SCID | DSM-IV | 190 | 59 (31) |
| **Watnick, 2005**63 | USA | Long term dialysis patients | SCID | DSM-IV | 62 | 12 (19) |
| **Fully Structured Interviews** | | | | | | | |
| **Al-Ghafri, 2014**64 | Oman | Medical trainees | CIDI | NR | 131 | NRa |
| **Delgadillo, 2011**65  **Haddad, 2013**66 | UK  UK | Outpatients in drug addiction treatment  Coronary heart disease patients | CIS-R  CIS-R | ICD-10  ICD-10 | 103  730 | 51(50)  32 (4) |
| **Mini International Neuropsychiatric Interviews (MINI)** | | | | | | | |
| **Persoons, 2003**67 | Belgium | Otorhinolaryngology outpatients | MINI | DSM-IV | 97 | 16 (16) |
| **Rathore, 2014**68 | USA | Adults with epilepsy | MINI | DSM-IV | 172 | 33 (19) |
| **Scott, 2011**69 | USA | Chronic hepatitis C patients | MINI | DSM-IV and ICD-10 | 30 | NRa |
| **van Steenbergen-Weijenburg, 2010**70 | The Netherlands | Diabetes patients | MINI | DSM-IV | 172 | 33 (19) |
| **Wang, 2014**71 | China | General population | MINI | DSM-IV | 1045 | 28 (3) |

aNot reported

**Abbreviations**: CIDI: Composite International Diagnostic Interview; CIS-R: Clinical Interview Schedule Revised; DSM: Diagnostic and Statistical Manual of Mental Disorders; ICD: International Classification of Diseases; MINI: Mini International Neuropsychiatric Interview; NR: Not Reported; PHQ-9: Patient Health Questionnaire-9; SCID: Structured Clinical Interview for DSM Disorders; UK: United Kingdom; USA: United States of America.

**Supplementary Table 3.** Estimates of heterogeneity for PHQ-9 diagnostic algorithm

| **Participant Subgroup** | **Semi-structured Diagnostic Interviews** | | | | **Fully Structured Diagnostic Interviews** | | | | **Mini International Neuropsychiatric Interviews** | | | |
| --- | --- | --- | --- | --- | --- | --- | --- | --- | --- | --- | --- | --- |
| **Ra** | | **τ2** | | **Ra** | | **τ2** | | **R** | | **τ2** | |
| **Sensitivity** | **Specificity** | **Sensitivity** | **Specificity** | **Sensitivity** | **Specificity** | **Sensitivity** | **Specificity** | **Sensitivity** | **Specificity** | **Sensitivity** | **Specificity** |
| **All participants** | 2.11 | 2.69 | 0.38 | 0.61 | 3.04 | 4.34 | 0.52 | 0.69 | 0.04 | 0.03 | 0.29 | 0.48 |
| **Participants not currently diagnosed or receiving treatment for a mental health problem** | 2.17 | 2.43 | 0.62 | 0.73 | 1.68 | 3.60 | 0.11 | 0.52 | 1.56 | 1.23 | 0.15 | 0.15 |
| **Age <60** | 2.14 | 2.54 | 0.52 | 0.60 | 2.83 | 4.20 | 0.56 | 0.81 | 1.77 | 1.77 | 0.31 | 0.30 |
| **Age ≥60** | 1.58 | 1.65 | 0.52 | 0.60 | 1.23 | 2.53 | 0.04 | 0.60 | 1.10 | 1.61 | 0.01 | 0.49 |
| **Women** | 2.23 | 2.64 | 0.69 | 0.83 | 3.01 | 3.96 | 0.82 | 0.89 | 1.48 | 2.36 | 0.14 | 1.05 |
| **Men** | 0.04 | 0.04 | 0.22 | 0.28 | 1.17 | 2.48 | 0.05 | 0.41 | 1.72 | 1.83 | 0.4 | 0.65 |
| **Very high human development index** | 2.04 | 2.33 | 0.34 | 0.41 | 2.76 | 3.52 | 0.34 | 0.37 | 2.16 | 2.49 | 0.30 | 1.02 |
| **Low, medium, or high human development index** | 0.03 | 0.03 | 0.01 | 2.52 | 1.42 | 4.93 | 0.01 | 1.20 | 1.58 | 1.14 | 0.19 | 0.02 |
| **Non-medical care** | 1.00 | 1.00 | 0.00 | 0.00 | 1.90 | 1.98 | 0.30 | 0.17 | 2.06 | 2.09 | 0.37 | 0.50 |
| **Primary care** | 1.26 | 3.7 | 0.05 | 1.10 | 2.23 | 4.13 | 0.12 | 0.48 | 1.73 | 1.71 | 0.18 | 0.12 |
| **Inpatient specialty care**b | 2.63 | 1.33 | 1.65 | 0.12 | 1.71 | 1.48 | 0.44 | 0.06 | -- | -- | -- | -- |
| **Outpatient specialty care**b | 1.81 | 2.63 | 0.32 | 0.59 | 3.40 | 6.11 | 0.43 | 1.18 | 1.95 | 1.73 | 0.20 | 0.50 |

a R is the ratio of the estimated standard deviation of the pooled sensitivity (or specificity) from the random-effects model to the estimated standard deviation of the pooled sensitivity (or specificity) from the corresponding fixed-effects model

bAmong studies that used the MINI as the reference standard, only 1 study included participants from an inpatient specialty care setting. These participants were combined with participants from outpatient specialty care settings for all subgroup analyses

**Supplementary Table 4a.** Comparison of sensitivity and specificity estimates for the original PHQ-9 diagnostic algorithm among all participants, among participants not currently diagnosed or receiving treatment for a mental health problem, and among participant subgroups based on age, sex, human development index, and care setting

| **Participant Subgroup** | **Semi-structured Diagnostic Interviews** | | | | **Fully Structured Diagnostic Interviews** | | | | **Mini International Neuropsychiatric Interviews** | | | |
| --- | --- | --- | --- | --- | --- | --- | --- | --- | --- | --- | --- | --- |
| **Sensitivity** | | **Specificity** | | **Sensitivity** | | **Specificity** | | **Sensitivity** | | **Specificity** | |
| **Estimate** | **95% CI** | **Estimate** | **95% CI** | **Estimate** | **95% CI** | **Estimate** | **95% CI** | **Estimate** | **95% CI** | **Estimate** | **95% CI** |
| **All participants** | 0.57 | (0.49, 0.64) | 0.95 | (0.94, 0.97) | 0.35 | (0.26, 0.46) | 0.95 | (0.93, 0.97) | 0.51 | (0.49, 0.53) | 0.97 | (0.96, 0.98) |
| **Participants not currently diagnosed or receiving treatment for a mental health problem** | 0.50 | (0.38, 0.62) | 0.97 | (0.95, 0.98) | 0.36 | (0.27, 0.46) | 0.97 | (0.95, 0.99) | 0.44 | (0.33, 0.56) | 0.97 | (0.96, 0.99) |
| **Age <60** | 0.56 | (0.47, 0.65) | 0.95 | (0.92, 0.96) | 0.37 | (0.27, 0.48) | 0.95 | (0.92, 0.97) | 0.53 | (0.43, 0.63) | 0.96 | (0.94, 0.97) |
| **Age ≥60** | 0.56 | (0.47, 0.65) | 0.95 | (0.92, 0.96) | 0.23 | (0.17, 0.31) | 0.95 | (0.92, 0.97) | 0.45 | (0.38, 0.53) | 0.98 | (0.96, 0.99) |
| **Women** | 0.63 | (0.53, 0.72) | 0.95 | (0.93, 0.97) | 0.35 | (0.23, 0.49) | 0.95 | (0.92, 0.97) | 0.49 | (0.41, 0.57) | 0.96 | (0.92, 0.98) |
| **Men** | 0.51 | (0.49, 0.53) | 0.97 | (0.96, 0.98) | 0.30 | (0.25, 0.36) | 0.96 | (0.94, 0.97) | 0.50 | (0.38, 0.62) | 0.97 | (0.95, 0.99) |
| **Very high human development index** | 0.54 | (0.46, 0.62) | 0.96 | (0.94, 0.97) | 0.44 | (0.33, 0.56) | 0.94 | (0.90, 0.96) | 0.52 | (0.41, 0.62) | 0.97 | (0.94, 0.99) |
| **Low, medium, or high human development index** | 0.71 | (0.71, 0.72) | 0.96 | (0.95, 0.96) | 0.26 | (0.19, 0.32) | 0.98 | (0.94, 0.99) | 0.48 | (0.34, 0.62) | 0.96 | (0.94, 0.97) |
| **Non-medical care** | 0.52 | (0.43, 0.62) | 0.97 | (0.95, 0.98) | 0.37 | (0.19, 0.59) | 0.96 | (0.92, 0.98) | 0.61 | (0.37, 0.81) | 0.93 | (0.81, 0.98) |
| **Primary care** | 0.68 | (0.61, 0.74) | 0.96 | (0.92, 0.98) | 0.41 | (0.29, 0.54) | 0.96 | (0.93, 0.98) | 0.48 | (0.35, 0.61) | 0.96 | (0.93, 0.97) |
| **Inpatient specialty care**a | 0.46 | (0.20, 0.74) | 0.93 | (0.90, 0.95) | 0.60 | (0.32, 0.83) | 0.88 | (0.81, 0.91) | -- | -- | -- | -- |
| **Outpatient specialty care**a | 0.51 | (0.41, 0.61) | 0.95 | (0.92, 0.97) | 0.22 | (0.12, 0.38) | 0.96 | (0.89, 0.99) | 0.49 | (0.38, 0.61) | 0.98 | (0.96, 0.99) |

aAmong studies that used the MINI as the reference standard, only 1 study included participants from an inpatient specialty care setting. These participants were combined with participants from outpatient specialty care settings for all subgroup analyses

**Abbreviations**: CI: confidence interval

**Supplementary Table 4b.** Comparison of sensitivity and specificity estimates for the modified PHQ-9 diagnostic algorithm among all participants, among participants not currently diagnosed or receiving treatment for a mental health problem, and among participant subgroups based on age, sex, human development index, and care setting

| **Participant Subgroup** | **Semi-structured Diagnostic Interviews** | | | | **Fully Structured Diagnostic Interviews** | | | | **Mini International Neuropsychiatric Interviews** | | | |
| --- | --- | --- | --- | --- | --- | --- | --- | --- | --- | --- | --- | --- |
| **Sensitivity** | | **Specificity** | | **Sensitivity** | | **Specificity** | | **Sensitivity** | | **Specificity** | |
| **Estimate** | **95% CI** | **Estimate** | **95% CI** | **Estimate** | **95% CI** | **Estimate** | **95% CI** | **Estimate** | **95% CI** | **Estimate** | **95% CI** |
| **All participants** | 0.54 | (0.45, 0.64) | 0.96 | (0.94, 0.97) | 0.37 | (0.27, 0.48) | 0.95 | (0.92, 0.97) | 0.54 | (0.45, 0.64) | 0.96 | (0.94, 0.97) |
| **Participants not currently diagnosed or receiving treatment for a mental health problem** | 0.55 | (0.42, 0.66) | 0.97 | (0.95, 0.98) | 0.37 | (0.28, 0.47) | 0.97 | (0.95, 0.99) | 0.46 | (0.35, 0.58) | 0.97 | (0.96, 0.98) |
| **Age <60** | 0.59 | (0.50, 0.68) | 0.94 | (0.92, 0.96) | 0.39 | (0.28, 0.52) | 0.95 | (0.91, 0.97) | 0.57 | (0.46, 0.67) | 0.95 | (0.93, 0.97) |
| **Age ≥60** | 0.59 | (0.50, 0.68) | 0.94 | (0.92, 0.96) | 0.23 | (0.16, 0.31) | 0.95 | (0.90, 0.97) | 0.50 | (0.42, 0.58) | 0.98 | (0.95, 0.99) |
| **Women** | 0.65 | (0.55, 0.74) | 0.95 | (0.92, 0.96) | 0.37 | (0.25, 0.51) | 0.95 | (0.91, 0.97) | 0.53 | (0.44, 0.61) | 0.95 | (0.91, 0.97) |
| **Men** | 0.58 | (0.49, 0.66) | 0.96 | (0.94, 0.97) | 0.34 | (0.26, 0.43) | 0.95 | (0.93, 0.97) | 0.55 | (0.41, 0.67) | 0.97 | (0.94, 0.98) |
| **Very high human development index** | 0.58 | (0.50, 0.65) | 0.95 | (0.94, 0.96) | 0.46 | (0.34, 0.58) | 0.93 | (0.90, 0.96) | 0.56 | (0.44, 0.68) | 0.97 | (0.94, 0.98) |
| **Low, medium, or high human development index** | 0.76 | (0.67, 0.84) | 0.96 | (0.77, 0.99) | 0.27 | (0.26, 0.27) | 0.98 | (0.97, 0.99) | 0.49 | (0.37, 0.61) | 0.95 | (0.93, 0.96) |
| **Non-medical care** | 0.58 | (0.48, 0.67) | 0.97 | (0.95, 0.98) | 0.37 | (0.19, 0.59) | 0.95 | (0.91, 0.98) | 0.63 | (0.36, 0.85) | 0.92 | (0.78, 0.98) |
| **Primary care** | 0.72 | (0.66, 0.77) | 0.96 | (0.91, 0.98) | 0.45 | (0.33, 0.57) | 0.96 | (0.93, 0.98) | 0.51 | (0.37, 0.66) | 0.95 | (0.92, 0.97) |
| **Inpatient specialty care**a | 0.56 | (0.37, 0.73) | 0.92 | (0.90, 0.94) | 0.60 | (0.31, 0.83) | 0.87 | (0.79, 0.92) | -- | -- | -- | -- |
| **Outpatient specialty care**a | 0.54 | (0.43, 0.65) | 0.95 | (0.91, 0.97) | 0.24 | (0.14, 0.37) | 0.96 | (0.88, 0.99) | 0.53 | (0.41, 0.65) | 0.97 | (0.96, 0.98) |

aAmong studies that used the MINI as the reference standard, only 1 study included participants from an inpatient specialty care setting. These participants were combined with participants from outpatient specialty care settings for all subgroup analyses

**Abbreviations**: CI: confidence interval

**Supplementary Table 4c.** Differences in sensitivity and specificity estimates for the original PHQ-9 diagnostic algorithm among fully structured reference standards and MINI reference standards compared to semi-structured reference standards among all participants, among participants not currently diagnosed or receiving treatment for a mental health problem, and among participant subgroups based on age, sex, human development index, and care setting

|  |  | **Semi-structured - Fully structureda,b** | | | |  | **Semi-structured – MINIc,d** | | | |
| --- | --- | --- | --- | --- | --- | --- | --- | --- | --- | --- |
| **Participant Subgroup** |  | **Sensitivity** | **95% CI** | **Specificity** | **95% CI** |  | **Sensitivity** | **95% CI** | **Specificity** | **95% CI** |
| **All participants** |  | 0.24 | (0.11, 0.36) | 0.00 | (-0.04, 0.04) |  | 0.07 | (-0.03, 0.16) | -0.03 | (-0.02 0.02) |
| **Participants not currently diagnosed or receiving treatment for a mental health problem** |  | 0.18 | (-0.16, 0.35) | 0.00 | (-0.05, 0.11) |  | 0.09 | (-0.07, 0.28) | 0.00 | (-0.08, 0.16) |
| **Age <60** |  | 0.2 | (-0.03, 0.41) | -0.01 | (-0.05, 0.02) |  | 0.02 | (-0.02, 0.06) | -0.01 | (-0.09, 0.06) |
| **Age ≥60** |  | 0.36 | (0.05, 0.46) | -0.01 | (-0.05, 0.01) |  | 0.09 | (-0.08, 0.31) | -0.04 | (-0.13, 0.06) |
| **Women** |  | 0.28 | (0.19, 0.37) | 0.00 | (-0.08, 0.16) |  | 0.12 | (0.05, 0.17) | 0.00 | (-0.07, 0.07) |
| **Men** |  | 0.24 | (0.17, 0.31) | 0.01 | (-0.21, 0.19) |  | 0.03 | (-0.15, 0.27) | -0.01 | (-0.09, 0.06) |
| **Very high human development index** |  | 0.12 | (0.05, 0.17) | 0.02 | (-0.27, 0.40) |  | 0.02 | (-0.27, 0.40) | -0.02 | (-0.08, 0.04) |
| **Low, medium, or high human development index** |  | 0.49 | (0.22, 0.55) | -0.02 | (-0.18, 0.13) |  | 0.27 | (-0.11, 0.41) | 0.01 | (-0.21, 0.19) |
| **Non-medical care** |  | 0.21 | (0.07, 0.39) | 0.02 | (-0.09, 0.14) |  | -0.05 | (-0.16, 0.10) | 0.05 | (-0.10, 0.19) |
| **Primary care** |  | 0.27 | (0.19, 0.37) | 0.00 | (-0.06, 0.06) |  | 0.21 | (-0.02, 0.46) | 0.01 | (-0.05, 0.06) |
| **Inpatient specialty carea** |  | -0.04 | (-0.42, 0.17) | 0.05 | (-0.18, 0.22) |  | -- |  | -- |  |
| **Outpatient specialty carea** |  | 0.30 | (0.23, 0.39) | -0.01 | (-0.24, 0.17) |  | 0.01 | (-0.21, 0.19) | -0.02 | (-0.18, 0.10) |

a 1 bootstrap iteration (0.01%) did not produce a difference estimate for the PHQ-9 diagnostic algorithm. This iteration was removed prior to determining the bootstrapped CI.

b 1 bootstrap iteration (0.01%) did not produce a difference estimate for the modified PHQ-9 diagnostic algorithm. This iteration was removed prior to determining the bootstrapped CI.

c 1 bootstrap iteration (0.01%) did not produce a difference estimate for the PHQ-9 diagnostic algorithm. This iteration was removed prior to determining the bootstrapped CI.

d 1 bootstrap iteration (0.01%) did not produce a difference estimate for the modified PHQ-9 diagnostic algorithm. This iteration was removed prior to determining the bootstrapped CI.

**Abbreviations**: CI: confidence interval; MINI: Mini International Neuropsychiatric Interview

**Supplementary Table 4d.** Differences in sensitivity and specificity estimates for the modified PHQ-9 diagnostic algorithm among fully structured reference standards and MINI reference standards compared to semi-structured reference standards among all participants, among participants not currently diagnosed or receiving treatment for a mental health problem, and among participant subgroups based on age, sex, human development index, and care setting

|  |  | **Semi-structured - Fully structureda,b** | | | |  | **Semi-structured – MINIc,d** | | | |
| --- | --- | --- | --- | --- | --- | --- | --- | --- | --- | --- |
| **Participant Subgroup** |  | **Sensitivity** | **95% CI** | **Specificity** | **95% CI** |  | **Sensitivity** | **95% CI** | **Specificity** | **95% CI** |
| **All participants** |  | 0.22 | (-0.04,0.36) | 0.00 | (-0.02, 0.02) |  | 0.06 | (-0.04, 0.16) | -0.02 | (-0.03, 0.02) |
| **Participants not currently diagnosed or receiving treatment for a mental health problem** |  | 0.14 | (-0.06, 0.48) | 0.00 | (-0.08, 0.07) |  | 0.06 | (-0.08, 0.36) | 0.00 | (-0.10, 0.08) |
| **Age <60** |  | 0.19 | (0.14, 0.26) | 0.00 | (-0.07, 0.07) |  | 0.03 | (-0.12, 0.19) | -0.01 | (-0.09, 0.04) |
| **Age ≥60** |  | 0.33 | (0.00, 0.36) | 0.00 | (-0.06, 0.06) |  | 0.11 | (-0.01, 0.22) | -0.03 | (-0.08, 0.00) |
| **Women** |  | 0.28 | (0.05, 0.39) | 0.00 | (-0.04, 0.05) |  | 0.14 | (-0.03, 0.26) | -0.01 | (-0.10, 0.06) |
| **Men** |  | 0.21 | (0.07, 0.39) | 0.01 | (-0.03, 0.03) |  | 0.01 | (-0.03, 0.04) | 0.00 | (-0.06, 0.03) |
| **Very high human development index** |  | 0.10 | (0.04, 0.20) | 0.02 | (-0.22, 0.20) |  | 0.02 | (-0.07, 0.15) | -0.01 | (-0.10, 0.06) |
| **Low, medium, or high human development index** |  | 0.45 | (0.23, 0.54) | -0.02 | (-0.10, 0.08) |  | 0.23 | (0.04, 0.37) | 0.00 | (-0.11, 0.11) |
| **Non-medical care** |  | 0.15 | (0.14, 0.26) | 0.01 | (-0.21, 0.19) |  | -0.09 | (-0.21, 0.02) | 0.04 | (-0.16, 0.24) |
| **Primary care** |  | 0.27 | (-0.11, 0.41) | 0.00 | (-0.05, 0.04) |  | 0.20 | (-0.03, 0.41) | 0.00 | (-0.06, 0.12) |
| **Inpatient specialty carea** |  | -0.14 | (-0.31, -0.04) | 0.05 | (-0.02, 0.15) |  | -- |  | -- |  |
| **Outpatient specialty carea** |  | 0.29 | (-0.08, 0.38) | -0.01 | (-0.05, 0.01) |  | 0.02 | (-0.03, 0.12) | -0.03 | (-0.07, 0.00) |

a 1 bootstrap iteration (0.01%) did not produce a difference estimate for the PHQ-9 diagnostic algorithm. This iteration was removed prior to determining the bootstrapped CI.

b 1 bootstrap iteration (0.01%) did not produce a difference estimate for the modified PHQ-9 diagnostic algorithm. This iteration was removed prior to determining the bootstrapped CI.

c 1 bootstrap iteration (0.01%) did not produce a difference estimate for the PHQ-9 diagnostic algorithm. This iteration was removed prior to determining the bootstrapped CI.

d 1 bootstrap iteration (0.01%) did not produce a difference estimate for the modified PHQ-9 diagnostic algorithm. This iteration was removed prior to determining the bootstrapped CI.

**Abbreviations**: CI: confidence interval; MINI: Mini International Neuropsychiatric Interview

**Supplementary Table 5.** QUADAS-2 ratings for each primary study included in the present study

|  | **Domain 1: Participant Selection** | | | | | | **Domain 2: Index Test** | | | | **Domain 3: Reference Standard** | | | | | **Domain 4: Flow and Timing** | | | | |
| --- | --- | --- | --- | --- | --- | --- | --- | --- | --- | --- | --- | --- | --- | --- | --- | --- | --- | --- | --- | --- |
| **First Author, Year** | **SQ1** | | **SQ2** | **SQ3** | **RoB** | **AC** | **SQ 1** | **SQ2** | **RoB** | **AC** | **SQ1** | **SQ2** | **SQ3** | **RoB** | **AC** | **SQ1** | **SQ2** | **SQ3** | **SQ4** | **RoB** |
| **Semi-structured Interviews** | | | | | | | | | | | | | | | | | | | | |
| **Amoozegar, 20171** | U/C | | Yes | Yes | Low | Low | N/A | N/A | Low | Low | Yes | Yes | U/C | U/C | Low | U/C | Yes | Yes | No | U/C |
| **Ayalon, 2010**2 | U/C | | Yes | Yes | U/C | Low | N/A | N/A | Low | Low | Yes | U/C | U/C | U/C | Low | Yes | Yes | Yes | Yes | Low |
| **Beraldi, 2014**3 | U/C | | Yes | Yes | U/C | Low | N/A | N/A | Low | Low | Yes | U/C | U/C | U/C | Low | Yes | Yes | Yes | Yes | Low |
| **Bombardier, 2012**4 | U/C | | Yes | Yes | U/C | Low | N/A | N/A | Low | Low | Yes | Yes | Yes | Low | Low | IPDa | Yes | Yes | U/C | IPDa |
| **Chagas, 2013**5 | Yes | | Yes | Yes | Low | Low | N/A | N/A | Low | Low | Yes | Yes | Yes | Low | Low | Yes | Yes | Yes | No | U/C |
| **Eack, 2006**6 | U/C | | Yes | Yes | U/C | U/C | N/A | N/A | Low | Low | Yes | Yes | Yes | Low | Low | Yes | Yes | Yes | Yes | Low |
| **Fiest, 2014**7 | U/C | | Yes | Yes | Low | Low | N/A | N/A | Low | Low | Yes | Yes | U/C | U/C | Low | U/C | Yes | Yes | No | U/C |
| **Fischer, 2014**8 | U/C | | Yes | Yes | U/C | U/C | N/A | N/A | Low | Low | Yes | U/C | Yes | U/C | Low | Yes | Yes | Yes | Yes | Low |
| **Gjerdingen, 2009**9 | No | | Yes | Yes | U/C | Low | N/A | N/A | Low | Low | Yes | U/C | U/C | U/C | Low | U/C | Yes | Yes | U/C | U/C |
| **Gräfe, 2004**10 | Yes | | Yes | Yes | Low | Low | N/A | N/A | Low | Low | Yes | Yes | U/C | U/C | Low | Yes | Yes | Yes | U/C | U/C |
| **Khamseh, 2011**11 | U/C | | Yes | Yes | U/C | Low | N/A | N/A | Low | Low | Yes | Yes | Yes | Low | Low | Yes | Yes | Yes | Yes | Low |
| **Kwan, 2012**12 | U/C | | Yes | Yes | U/C | Low | N/A | N/A | Low | Low | Yes | U/C | U/C | U/C | U/C | Yes | Yes | Yes | U/C | U/C |
| **Lambert, 2015**13 | No | | Yes | Yes | U/C | U/C | N/A | N/A | Low | Low | Yes | Yes | Yes | Low | Low | Yes | Yes | Yes | Yes | Low |
| **Liu, 2011**14 | U/C | | Yes | Yes | U/C | U/C | N/A | N/A | Low | Low | Yes | Yes | Yes | Low | Low | Yes | Yes | Yes | No | U/C |
| **McGuire, 2013**15 | U/C | | Yes | Yes | Low | Low | N/A | N/A | Low | Low | Yes | Yes | U/C | U/C | Low | Yes | Yes | Yes | Yes | Low |
| **Osório, 2009**16 | No | | Yes | Yes | U/C | Low | N/A | N/A | Low | Low | Yes | U/C | U/C | U/C | Low | Yes | Yes | Yes | Yes | Low |
| **Osório, 2012**17 | U/C | | Yes | Yes | U/C | U/C | N/A | N/A | Low | Low | Yes | Yes | U/C | U/C | Low | Yes | Yes | Yes | Yes | Low |
| **Picardi, 2005**18 | Yes | | Yes | Yes | Low | U/C | N/A | N/A | Low | Low | Yes | Yes | Yes | Low | Low | Yes | Yes | Yes | Yes | Low |
| **Richardson, 2010**19 | U/C | | Yes | Yes | U/C | Low | N/A | N/A | Low | Low | Yes | U/C | U/C | U/C | Low | Yes | Yes | Yes | Yes | Low |
| **Rooney, 2013**20 | U/C | | Yes | Yes | U/C | Low | N/A | N/A | Low | Low | Yes | U/C | Yes | U/C | Low | Yes | Yes | Yes | Yes | Low |
| **Sidebottom, 20122**1 | No | | Yes | Yes | U/C | U/C | N/A | N/A | Low | Low | Yes | Yes | No | High | Low | IPDa | Yes | Yes | No | U/C |
| **Simning, 2012**22 | No | | Yes | Yes | U/C | Low | N/A | N/A | Low | Low | Yes | U/C | No | High | Low | Yes | Yes | Yes | Yes | Low |
| **Turner, Unpublished** | U/C | | Yes | Yes | U/C | U/C | N/A | N/A | Low | Low | Yes | U/C | Yes | U/C | Low | Yes | Yes | Yes | Yes | Low |
| **Turner, 2012**23 | U/C | | Yes | Yes | Low | Low | N/A | N/A | Low | Low | Yes | U/C | Yes | U/C | Low | Yes | Yes | Yes | Yes | Low |
| **Twist, 2013**24 | U/C | | Yes | Yes | U/C | U/C | N/A | N/A | Low | Low | Yes | No | Yes | High | Low | Yes | Yes | Yes | U/C | U/C |
| **Williams, 2012**25 | No | | Yes | Yes | U/C | Low | N/A | N/A | Low | Low | Yes | Yes | Yes | Low | Low | IPDa | Yes | Yes | Yes | IPDa |
| **Wittkampf, 2009**26 | No | | Yes | Yes | U/C | Low | N/A | N/A | Low | Low | Yes | Yes | U/C | U/C | Low | Yes | Yes | Yes | No | U/C |
| **Fully Structured Interviews** | | | | | | | | | | | | | | | | | | | | |
| **Arroll, 2010**27 | Yes | | Yes | Yes | Low | Low | N/A | N/A | Low | Low | Yes | Yes | Yes | Low | Low | Yes | Yes | Yes | Yes | Low |
| **Azah, 2005**28 | U/C | | Yes | Yes | U/C | U/C | N/A | N/A | Low | Low | Yes | Yes | Yes | Low | U/C | Yes | U/C | Yes | U/C | U/C |
| **de Man-van Ginkel, 2012**29 | No | | Yes | Yes | U/C | Low | N/A | N/A | Low | Low | Yes | Yes | Yes | Low | Low | Yes | Yes | Yes | Yes | Low |
| **Gelaye, 2014**30 | U/C | | Yes | Yes | U/C | U/C | N/A | N/A | Low | Low | Yes | U/C | Yes | U/C | Low | Yes | Yes | Yes | Yes | Low |
| **Hahn, 2006**31 | U/C | | Yes | Yes | U/C | U/C | N/A | N/A | Low | Low | Yes | U/C | Yes | U/C | Low | U/C | Yes | Yes | Yes | U/C |
| **Henkel, 2004**32 | U/C | | Yes | Yes | U/C | U/C | N/A | N/A | Low | Low | Yes | Yes | Yes | Low | Low | Yes | Yes | Yes | Yes | Low |
| **Hobfoll, 2011**33 | U/C | | Yes | Yes | U/C | U/C | N/A | N/A | Low | Low | Yes | U/C | Yes | U/C | Low | U/C | Yes | Yes | Yes | U/C |
| **Kiely, 2014**34 | U/C | | Yes | Yes | U/C | Low | N/A | N/A | Low | Low | Yes | U/C | Yes | U/C | Low | U/C | U/C | Yes | U/C | U/C |
| **Mohd Sidik, 2012**35 | Yes | | Yes | Yes | Low | Low | N/A | N/A | Low | Low | Yes | Yes | Yes | Low | U/C | Yes | Yes | Yes | Yes | Low |
| **Patel, 2008**36 | Yes | | Yes | Yes | Low | U/C | N/A | N/A | Low | Low | Yes | Yes | Yes | Low | Low | Yes | Yes | Yes | Yes | Low |
| **Pence, 2012**37 | Yes | | Yes | Yes | Low | U/C | N/A | N/A | Low | Low | Yes | Yes | Yes | Low | Low | Yes | Yes | Yes | Yes | Low |
| **Razykov, 2013**38 | No | | Yes | Yes | U/C | U/C | N/A | N/A | Low | Low | Yes | U/C | Yes | U/C | Low | Yes | Yes | Yes | Yes | Low |
| **Thombs, 2008**39 | No | | Yes | Yes | U/C | Low | N/A | N/A | Low | Low | Yes | Yes | Yes | Low | Low | Yes | Yes | Yes | Yes | Low |
| **Mini International Neuropsychiatric Interviews (MINI)** | | | | | | | | | | | | | | | | | | | | |
| **Akena, 2013**40 | | U/C | Yes | Yes | U/C | Low | N/A | N/A | Low | Low | Yes | Yes | Yes | Low | Low | Yes | Yes | Yes | Yes | Low |
| **Cholera, 2014**41 | | U/C | Yes | Yes | U/C | U/C | N/A | N/A | Low | U/C | Yes | Yes | Yes | Low | U/C | Yes | No | Yes | Yes | Low |
| **Hides, 2007**42 | | No | Yes | Yes | U/C | U/C | N/A | N/A | Low | Low | Yes | U/C | Yes | U/C | Low | Yes | Yes | Yes | Yes | Low |
| **Hyphantis, 2011**43 | | Yes | Yes | Yes | Low | Low | N/A | N/A | Low | Low | Yes | Yes | Yes | Low | Low | U/C | U/C | Yes | U/C | U/C |
| **Hyphantis, 2014**44 | | U/C | Yes | Yes | U/C | Low | N/A | N/A | Low | Low | Yes | Yes | Yes | Low | Low | Yes | Yes | Yes | Yes | Low |
| **Inagaki, 2013**45 | | Yes | Yes | Yes | Low | U/C | N/A | N/A | Low | Low | Yes | Yes | Yes | Low | Low | Yes | No | Yes | Yes | High |
| **Lamers, 2008**46 | | U/C | Yes | Yes | Low | Low | N/A | N/A | Low | Low | Yes | Yes | Yes | Low | Low | IPDa | Yes | Yes | No | U/C |
| **Lotrakul, 2008**47 | | No | Yes | Yes | U/C | U/C | N/A | N/A | Low | Low | Yes | Yes | Yes | Low | Low | Yes | No | Yes | Yes | High |
| **Muramatsu, 2007**48 | | U/C | Yes | Yes | U/C | U/C | N/A | N/A | Low | Low | Yes | Yes | Yes | Low | Low | Yes | Yes | Yes | Yes | Low |
| **Persoons, 2001**49 | | Yes | Yes | Yes | Low | U/C | N/A | N/A | Low | Low | Yes | Yes | Yes | Low | Low | Yes | Yes | Yes | Yes | Low |
| **Santos, 2013**50 | | Yes | Yes | Yes | Low | Low | N/A | N/A | Low | Low | Yes | U/C | Yes | U/C | Low | U/C | Yes | Yes | Yes | U/C |
| **Stafford, 2007**51 | | No | Yes | Yes | U/C | Low | N/A | N/A | Low | Low | Yes | Yes | Yes | Low | Low | Yes | Yes | Yes | U/C | Low |
| **Sung, 2013**52 | | Yes | Yes | Yes | Low | U/C | N/A | N/A | Low | Low | Yes | Yes | Yes | Low | Low | Yes | Yes | Yes | Yes | Low |
| **Zhang, 2013**53 | | U/C | Yes | Yes | U/C | Low | N/A | N/A | Low | Low | Yes | U/C | Yes | U/C | Low | IPDa | Yes | Yes | Yes | IPD1 |

**Abbreviations**: AC: acceptability concern, RoB: risk of bias, SQ: signalling question, N/A: not applicable; U/C: Unclear

aRating varies at the individual participant level

bWas unpublished at the time of electronic database search
